# Supplementary material for: Phylodynamic Dispersal of SARS-CoV-2 Lineages Circulating across Polish–German Border Provinces
Source: Viruses. 2022 Apr 24;14(5):884. doi: 10.3390/v14050884 (PMC9143188; doi:10.3390/v14050884)
Supplement: Supplementary file 1 [file viruses-14-00884-s001.zip › Supplemental_Table_3.xlsx]

## Sheet: Epi numbers for Alpha variant
SAX_EPI_ISL_1140810_2021-01-18
SAX_EPI_ISL_1141364_2021-01-21
SAX_EPI_ISL_1141539_2021-01-19
SAX_EPI_ISL_1142235_2021-01-25
SAX_EPI_ISL_1143042_2021-01-30
SAX_EPI_ISL_1143156_2021-01-26
SAX_EPI_ISL_1143216_2021-01-25
SAX_EPI_ISL_1144997_2021-02-01
SAX_EPI_ISL_1145040_2021-01-30
SAX_EPI_ISL_1145109_2021-02-02
SAX_EPI_ISL_1145142_2021-02-01
SAX_EPI_ISL_1145186_2021-02-02
SAX_EPI_ISL_1145929_2021-02-05
SAX_EPI_ISL_1146078_2021-02-06
SAX_EPI_ISL_1146616_2021-01-28
SAX_EPI_ISL_1146685_2021-01-29
SAX_EPI_ISL_1146697_2021-01-29
SAX_EPI_ISL_1146704_2021-01-29
SAX_EPI_ISL_1148300_2021-02-13
SAX_EPI_ISL_1148375_2021-02-08
SAX_EPI_ISL_1149090_2021-02-02
SAX_EPI_ISL_1149109_2021-02-02
SAX_EPI_ISL_1149128_2021-02-02
SAX_EPI_ISL_1149159_2021-02-02
SAX_EPI_ISL_1149191_2021-02-02
SAX_EPI_ISL_1149220_2021-02-02
SAX_EPI_ISL_1149235_2021-02-02
SAX_EPI_ISL_1150028_2021-02-11
SAX_EPI_ISL_1150048_2021-02-09
SAX_EPI_ISL_1150093_2021-02-10
SAX_EPI_ISL_1150122_2021-02-10
SAX_EPI_ISL_1150145_2021-02-09
SAX_EPI_ISL_1150190_2021-02-11
SAX_EPI_ISL_1150239_2021-02-04
SAX_EPI_ISL_1150269_2021-02-09
SAX_EPI_ISL_1150306_2021-02-12
SAX_EPI_ISL_1150336_2021-02-04
SAX_EPI_ISL_1150375_2021-02-03
SAX_EPI_ISL_1150540_2021-02-02
SAX_EPI_ISL_1150585_2021-02-02
SAX_EPI_ISL_1150625_2021-02-02
SAX_EPI_ISL_1150649_2021-02-02
SAX_EPI_ISL_1150683_2021-02-02
SAX_EPI_ISL_1151794_2021-02-15
SAX_EPI_ISL_1152575_2021-02-03
SAX_EPI_ISL_1154040_2021-02-08
SAX_EPI_ISL_1154524_2021-02-03
SAX_EPI_ISL_1154598_2021-02-04
SAX_EPI_ISL_1154663_2021-02-15
SAX_EPI_ISL_1154784_2021-02-14
SAX_EPI_ISL_1154810_2021-02-12
SAX_EPI_ISL_1154860_2021-02-12
SAX_EPI_ISL_1154899_2021-02-12
SAX_EPI_ISL_1154966_2021-02-15
SAX_EPI_ISL_1154993_2021-02-15
SAX_EPI_ISL_1155038_2021-02-03
SAX_EPI_ISL_1155085_2021-02-11
SAX_EPI_ISL_1155135_2021-02-08
SAX_EPI_ISL_1156177_2021-02-12
SAX_EPI_ISL_1156185_2021-02-10
SAX_EPI_ISL_1156196_2021-02-10
SAX_EPI_ISL_1156211_2021-02-12
SAX_EPI_ISL_1156225_2021-02-10
SAX_EPI_ISL_1156239_2021-02-10
SAX_EPI_ISL_1156257_2021-02-10
SAX_EPI_ISL_1156266_2021-02-18
SAX_EPI_ISL_1156280_2021-02-16
SAX_EPI_ISL_1156298_2021-02-17
SAX_EPI_ISL_1156315_2021-02-11
SAX_EPI_ISL_1156328_2021-02-11
SAX_EPI_ISL_1156344_2021-02-18
SAX_EPI_ISL_1156460_2021-02-15
SAX_EPI_ISL_1156555_2021-02-17
SAX_EPI_ISL_1156602_2021-02-16
SAX_EPI_ISL_1156653_2021-02-16
SAX_EPI_ISL_1156695_2021-02-16
SAX_EPI_ISL_1156730_2021-02-16
SAX_EPI_ISL_1156744_2021-02-16
SAX_EPI_ISL_1157204_2021-02-22
SAX_EPI_ISL_1157262_2021-02-22
SAX_EPI_ISL_1211091_2021-02-23
SAX_EPI_ISL_1211128_2021-02-17
SAX_EPI_ISL_1211170_2021-02-18
SAX_EPI_ISL_1211190_2021-02-17
SAX_EPI_ISL_1211207_2021-02-18
SAX_EPI_ISL_1211230_2021-02-19
SAX_EPI_ISL_1211273_2021-02-18
SAX_EPI_ISL_1211300_2021-02-19
SAX_EPI_ISL_1211339_2021-02-18
SAX_EPI_ISL_1211377_2021-02-17
SAX_EPI_ISL_1211406_2021-02-19
SAX_EPI_ISL_1211425_2021-02-19
SAX_EPI_ISL_1212553_2021-02-20
SAX_EPI_ISL_1212625_2021-02-22
SAX_EPI_ISL_1212716_2021-02-20
SAX_EPI_ISL_1212737_2021-02-22
SAX_EPI_ISL_1212764_2021-02-22
SAX_EPI_ISL_1212792_2021-02-22
SAX_EPI_ISL_1212807_2021-02-19
SAX_EPI_ISL_1212847_2021-02-22
SAX_EPI_ISL_1213839_2021-02-23
SAX_EPI_ISL_1214038_2021-02-25
SAX_EPI_ISL_1215598_2021-02-25
SAX_EPI_ISL_1215623_2021-02-25
SAX_EPI_ISL_1215751_2021-02-25
SAX_EPI_ISL_1216043_2021-02-13
SAX_EPI_ISL_1216153_2021-02-19
SAX_EPI_ISL_1216219_2021-02-23
SAX_EPI_ISL_1216311_2021-02-23
SAX_EPI_ISL_1216377_2021-02-12
SAX_EPI_ISL_1216400_2021-02-18
SAX_EPI_ISL_1216450_2021-02-12
SAX_EPI_ISL_1216465_2021-02-26
SAX_EPI_ISL_1216486_2021-02-23
SAX_EPI_ISL_1216496_2021-02-27
SAX_EPI_ISL_1216522_2021-02-24
SAX_EPI_ISL_1216542_2021-02-24
SAX_EPI_ISL_1216558_2021-02-26
SAX_EPI_ISL_1216576_2021-02-26
SAX_EPI_ISL_1216604_2021-02-24
SAX_EPI_ISL_1216627_2021-02-24
SAX_EPI_ISL_1216648_2021-02-27
SAX_EPI_ISL_1216674_2021-02-24
SAX_EPI_ISL_1216693_2021-02-23
SAX_EPI_ISL_1216719_2021-02-24
SAX_EPI_ISL_1216747_2021-02-24
SAX_EPI_ISL_1216778_2021-02-25
SAX_EPI_ISL_1217226_2021-02-24
SAX_EPI_ISL_1217236_2021-02-22
SAX_EPI_ISL_1217242_2021-02-25
SAX_EPI_ISL_1217253_2021-02-25
SAX_EPI_ISL_1217266_2021-02-23
SAX_EPI_ISL_1217275_2021-02-26
SAX_EPI_ISL_1217285_2021-02-22
SAX_EPI_ISL_1217292_2021-02-22
SAX_EPI_ISL_1217303_2021-02-25
SAX_EPI_ISL_1217312_2021-02-22
SAX_EPI_ISL_1217321_2021-02-24
SAX_EPI_ISL_1217330_2021-02-22
SAX_EPI_ISL_1217337_2021-02-22
SAX_EPI_ISL_1217343_2021-02-24
SAX_EPI_ISL_1217622_2021-03-01
SAX_EPI_ISL_1217652_2021-03-01
SAX_EPI_ISL_1217687_2021-03-01
SAX_EPI_ISL_1218307_2021-03-02
SAX_EPI_ISL_1280183_2021-02-27
SAX_EPI_ISL_1280879_2021-03-07
SAX_EPI_ISL_1282004_2021-02-10
SAX_EPI_ISL_1282023_2021-03-01
SAX_EPI_ISL_1282050_2021-03-02
SAX_EPI_ISL_1282088_2021-02-19
SAX_EPI_ISL_1282113_2021-03-01
SAX_EPI_ISL_1282132_2021-02-26
SAX_EPI_ISL_1282166_2021-02-27
SAX_EPI_ISL_1282171_2021-02-26
SAX_EPI_ISL_1282203_2021-03-03
SAX_EPI_ISL_1282238_2021-02-26
SAX_EPI_ISL_1282257_2021-02-27
SAX_EPI_ISL_1282292_2021-03-01
SAX_EPI_ISL_1283176_2021-03-04
SAX_EPI_ISL_1283197_2021-03-04
SAX_EPI_ISL_1283792_2021-03-08
SAX_EPI_ISL_1284566_2021-03-02
SAX_EPI_ISL_1284589_2021-03-02
SAX_EPI_ISL_1284607_2021-03-04
SAX_EPI_ISL_1284656_2021-02-26
SAX_EPI_ISL_1284710_2021-03-01
SAX_EPI_ISL_1284730_2021-03-02
SAX_EPI_ISL_1284749_2021-02-15
SAX_EPI_ISL_1284767_2021-03-02
SAX_EPI_ISL_1284785_2021-03-01
SAX_EPI_ISL_1284810_2021-03-02
SAX_EPI_ISL_1284857_2021-03-02
SAX_EPI_ISL_1284949_2021-03-02
SAX_EPI_ISL_1284955_2021-03-03
SAX_EPI_ISL_1284964_2021-03-03
SAX_EPI_ISL_1284966_2021-03-02
SAX_EPI_ISL_1284976_2021-03-03
SAX_EPI_ISL_1284989_2021-03-03
SAX_EPI_ISL_1285003_2021-03-03
SAX_EPI_ISL_1285010_2021-03-02
SAX_EPI_ISL_1285019_2021-03-03
SAX_EPI_ISL_1285033_2021-03-01
SAX_EPI_ISL_1285048_2021-03-08
SAX_EPI_ISL_1285061_2021-03-08
SAX_EPI_ISL_1285073_2021-03-08
SAX_EPI_ISL_1285084_2021-03-08
SAX_EPI_ISL_1285094_2021-03-08
SAX_EPI_ISL_1285108_2021-03-08
SAX_EPI_ISL_1285126_2021-03-08
SAX_EPI_ISL_1285144_2021-03-08
SAX_EPI_ISL_1285163_2021-03-08
SAX_EPI_ISL_1285623_2021-03-04
SAX_EPI_ISL_1349740_2021-03-08
SAX_EPI_ISL_1349756_2021-03-09
SAX_EPI_ISL_1349775_2021-03-02
SAX_EPI_ISL_1349790_2021-03-05
SAX_EPI_ISL_1349808_2021-03-08
SAX_EPI_ISL_1349823_2021-03-05
SAX_EPI_ISL_1349845_2021-03-05
SAX_EPI_ISL_1349866_2021-03-05
SAX_EPI_ISL_1349882_2021-03-05
SAX_EPI_ISL_1349907_2021-03-08
SAX_EPI_ISL_1349921_2021-03-04
SAX_EPI_ISL_1349932_2021-03-08
SAX_EPI_ISL_1349947_2021-03-05
SAX_EPI_ISL_1349970_2021-03-05
SAX_EPI_ISL_1349995_2021-03-08
SAX_EPI_ISL_1350010_2021-03-09
SAX_EPI_ISL_1350025_2021-03-08
SAX_EPI_ISL_1350045_2021-03-07
SAX_EPI_ISL_1350053_2021-03-04
SAX_EPI_ISL_1350063_2021-03-05
SAX_EPI_ISL_1352215_2021-03-08
SAX_EPI_ISL_1353143_2021-03-11
SAX_EPI_ISL_1353157_2021-03-11
SAX_EPI_ISL_1353173_2021-03-05
SAX_EPI_ISL_1353188_2021-03-11
SAX_EPI_ISL_1353208_2021-03-11
SAX_EPI_ISL_1353642_2021-03-10
SAX_EPI_ISL_1353659_2021-03-11
SAX_EPI_ISL_1353692_2021-03-11
SAX_EPI_ISL_1353722_2021-03-10
SAX_EPI_ISL_1353737_2021-03-10
SAX_EPI_ISL_1353743_2021-03-05
SAX_EPI_ISL_1353751_2021-03-09
SAX_EPI_ISL_1353773_2021-03-10
SAX_EPI_ISL_1353812_2021-03-09
SAX_EPI_ISL_1353821_2021-03-12
SAX_EPI_ISL_1353848_2021-03-10
SAX_EPI_ISL_1353872_2021-03-09
SAX_EPI_ISL_1353895_2021-03-10
SAX_EPI_ISL_1353912_2021-03-11
SAX_EPI_ISL_1353926_2021-03-12
SAX_EPI_ISL_1353944_2021-03-12
SAX_EPI_ISL_1353958_2021-03-12
SAX_EPI_ISL_1353974_2021-03-10
SAX_EPI_ISL_1354028_2021-03-02
SAX_EPI_ISL_1354191_2021-03-10
SAX_EPI_ISL_1354370_2021-03-15
SAX_EPI_ISL_1354387_2021-03-15
SAX_EPI_ISL_1354408_2021-03-15
SAX_EPI_ISL_1354433_2021-03-15
SAX_EPI_ISL_1354449_2021-03-15
SAX_EPI_ISL_1354459_2021-03-15
SAX_EPI_ISL_1356975_2021-03-08
SAX_EPI_ISL_1356986_2021-03-09
SAX_EPI_ISL_1356994_2021-03-11
SAX_EPI_ISL_1357007_2021-03-10
SAX_EPI_ISL_1357018_2021-03-11
SAX_EPI_ISL_1357028_2021-03-11
SAX_EPI_ISL_1357039_2021-03-03
SAX_EPI_ISL_1357047_2021-03-10
SAX_EPI_ISL_1357059_2021-03-10
SAX_EPI_ISL_1432952_2021-03-12
SAX_EPI_ISL_1433000_2021-03-17
SAX_EPI_ISL_1433023_2021-03-15
SAX_EPI_ISL_1433063_2021-03-12
SAX_EPI_ISL_1433073_2021-03-11
SAX_EPI_ISL_1433115_2021-03-15
SAX_EPI_ISL_1433150_2021-03-12
SAX_EPI_ISL_1433172_2021-03-11
SAX_EPI_ISL_1433185_2021-03-12
SAX_EPI_ISL_1433217_2021-03-17
SAX_EPI_ISL_1433236_2021-03-15
SAX_EPI_ISL_1433253_2021-03-12
SAX_EPI_ISL_1433278_2021-03-17
SAX_EPI_ISL_1433321_2021-03-14
SAX_EPI_ISL_1433340_2021-03-11
SAX_EPI_ISL_1433607_2021-03-20
SAX_EPI_ISL_1434461_2021-03-18
SAX_EPI_ISL_1434502_2021-03-18
SAX_EPI_ISL_1435967_2021-03-17
SAX_EPI_ISL_1436093_2021-03-13
SAX_EPI_ISL_1436164_2021-03-13
SAX_EPI_ISL_1438400_2021-03-16
SAX_EPI_ISL_1438593_2021-03-18
SAX_EPI_ISL_1438628_2021-03-18
SAX_EPI_ISL_1438661_2021-03-18
SAX_EPI_ISL_1438704_2021-03-15
SAX_EPI_ISL_1438724_2021-03-15
SAX_EPI_ISL_1438743_2021-03-15
SAX_EPI_ISL_1438753_2021-03-15
SAX_EPI_ISL_1438767_2021-03-16
SAX_EPI_ISL_1438776_2021-03-15
SAX_EPI_ISL_1438794_2021-03-19
SAX_EPI_ISL_1438807_2021-03-17
SAX_EPI_ISL_1438840_2021-03-15
SAX_EPI_ISL_1438860_2021-03-19
SAX_EPI_ISL_1438876_2021-03-15
SAX_EPI_ISL_1438895_2021-03-15
SAX_EPI_ISL_1438922_2021-03-17
SAX_EPI_ISL_1438948_2021-03-16
SAX_EPI_ISL_1438960_2021-03-15
SAX_EPI_ISL_1438978_2021-03-15
SAX_EPI_ISL_1438993_2021-03-16
SAX_EPI_ISL_1439023_2021-03-17
SAX_EPI_ISL_1439048_2021-03-18
SAX_EPI_ISL_1439082_2021-03-17
SAX_EPI_ISL_1439124_2021-03-20
SAX_EPI_ISL_1439150_2021-03-17
SAX_EPI_ISL_1439169_2021-03-15
SAX_EPI_ISL_1439188_2021-03-17
SAX_EPI_ISL_1439213_2021-03-18
SAX_EPI_ISL_1439245_2021-03-23
SAX_EPI_ISL_1439274_2021-03-16
SAX_EPI_ISL_1439295_2021-03-15
SAX_EPI_ISL_1439319_2021-03-15
SAX_EPI_ISL_1439347_2021-03-19
SAX_EPI_ISL_1439546_2021-03-09
SAX_EPI_ISL_1439554_2021-03-08
SAX_EPI_ISL_1439570_2021-03-08
SAX_EPI_ISL_1439603_2021-03-08
SAX_EPI_ISL_1439614_2021-03-11
SAX_EPI_ISL_1440967_2021-03-16
SAX_EPI_ISL_1440996_2021-03-16
SAX_EPI_ISL_1441006_2021-03-15
SAX_EPI_ISL_1441016_2021-03-18
SAX_EPI_ISL_1441030_2021-03-16
SAX_EPI_ISL_1441049_2021-03-16
SAX_EPI_ISL_1441060_2021-03-16
SAX_EPI_ISL_1441089_2021-03-16
SAX_EPI_ISL_1441104_2021-03-16
SAX_EPI_ISL_1441113_2021-03-17
SAX_EPI_ISL_1441124_2021-03-18
SAX_EPI_ISL_1441138_2021-03-17
SAX_EPI_ISL_1441155_2021-03-17
SAX_EPI_ISL_1441239_2021-03-22
SAX_EPI_ISL_1441266_2021-03-22
SAX_EPI_ISL_1441285_2021-03-22
SAX_EPI_ISL_1441309_2021-03-22
SAX_EPI_ISL_1442582_2021-03-22
SAX_EPI_ISL_1563758_2021-03-11
SAX_EPI_ISL_1563766_2021-03-12
SAX_EPI_ISL_1563776_2021-03-12
SAX_EPI_ISL_1563784_2021-03-16
SAX_EPI_ISL_1563791_2021-03-12
SAX_EPI_ISL_1563797_2021-03-17
SAX_EPI_ISL_1563803_2021-03-17
SAX_EPI_ISL_1563810_2021-03-02
SAX_EPI_ISL_1563855_2021-03-25
SAX_EPI_ISL_1565385_2021-03-25
SAX_EPI_ISL_1565401_2021-03-25
SAX_EPI_ISL_1567291_2021-03-27
SAX_EPI_ISL_1567483_2021-03-24
SAX_EPI_ISL_1567590_2021-03-25
SAX_EPI_ISL_1567667_2021-03-25
SAX_EPI_ISL_1568155_2021-03-24
SAX_EPI_ISL_1568163_2021-03-22
SAX_EPI_ISL_1568174_2021-03-26
SAX_EPI_ISL_1568187_2021-03-25
SAX_EPI_ISL_1568195_2021-03-23
SAX_EPI_ISL_1568202_2021-03-26
SAX_EPI_ISL_1568213_2021-03-26
SAX_EPI_ISL_1568224_2021-03-25
SAX_EPI_ISL_1568231_2021-03-24
SAX_EPI_ISL_1568241_2021-03-25
SAX_EPI_ISL_1568955_2021-03-20
SAX_EPI_ISL_1568970_2021-03-15
SAX_EPI_ISL_1568977_2021-03-16
SAX_EPI_ISL_1568993_2021-03-19
SAX_EPI_ISL_1569009_2021-03-19
SAX_EPI_ISL_1569026_2021-03-19
SAX_EPI_ISL_1569051_2021-03-15
SAX_EPI_ISL_1569068_2021-03-18
SAX_EPI_ISL_1569074_2021-03-18
SAX_EPI_ISL_1569085_2021-03-17
SAX_EPI_ISL_1569093_2021-03-19
SAX_EPI_ISL_1569107_2021-03-18
SAX_EPI_ISL_1569132_2021-03-19
SAX_EPI_ISL_1569141_2021-03-19
SAX_EPI_ISL_1569150_2021-03-19
SAX_EPI_ISL_1569165_2021-03-17
SAX_EPI_ISL_1569184_2021-03-20
SAX_EPI_ISL_1569198_2021-03-19
SAX_EPI_ISL_1569206_2021-03-17
SAX_EPI_ISL_1569230_2021-03-17
SAX_EPI_ISL_1569240_2021-03-17
SAX_EPI_ISL_1569259_2021-03-18
SAX_EPI_ISL_1569274_2021-03-19
SAX_EPI_ISL_1569379_2021-03-24
SAX_EPI_ISL_1569616_2021-03-22
SAX_EPI_ISL_1569770_2021-03-29
SAX_EPI_ISL_1569888_2021-03-29
SAX_EPI_ISL_1569899_2021-03-29
SAX_EPI_ISL_1569910_2021-03-29
SAX_EPI_ISL_1569917_2021-03-29
SAX_EPI_ISL_1569930_2021-03-29
SAX_EPI_ISL_1569939_2021-03-29
SAX_EPI_ISL_1569951_2021-03-22
SAX_EPI_ISL_1569962_2021-03-29
SAX_EPI_ISL_1569971_2021-03-22
SAX_EPI_ISL_1569985_2021-03-29
SAX_EPI_ISL_1570787_2021-03-25
SAX_EPI_ISL_1570854_2021-03-28
SAX_EPI_ISL_1570864_2021-03-25
SAX_EPI_ISL_1570871_2021-03-24
SAX_EPI_ISL_1570878_2021-03-27
SAX_EPI_ISL_1571063_2021-03-29
SAX_EPI_ISL_1571167_2021-04-01
SAX_EPI_ISL_1572531_2021-03-22
SAX_EPI_ISL_1572539_2021-03-16
SAX_EPI_ISL_1572550_2021-03-18
SAX_EPI_ISL_1573296_2021-04-06
SAX_EPI_ISL_1574936_2021-04-03
SAX_EPI_ISL_1638311_2021-04-01
SAX_EPI_ISL_1638339_2021-04-01
SAX_EPI_ISL_1638385_2021-04-01
SAX_EPI_ISL_1638410_2021-04-08
SAX_EPI_ISL_1638435_2021-04-06
SAX_EPI_ISL_1638458_2021-04-01
SAX_EPI_ISL_1638486_2021-04-01
SAX_EPI_ISL_1638683_2021-03-22
SAX_EPI_ISL_1638689_2021-03-22
SAX_EPI_ISL_1638704_2021-03-24
SAX_EPI_ISL_1638712_2021-03-25
SAX_EPI_ISL_1638721_2021-03-19
SAX_EPI_ISL_1638739_2021-03-22
SAX_EPI_ISL_1638754_2021-03-18
SAX_EPI_ISL_1638764_2021-03-27
SAX_EPI_ISL_1638772_2021-03-24
SAX_EPI_ISL_1638780_2021-03-22
SAX_EPI_ISL_1638788_2021-03-22
SAX_EPI_ISL_1638802_2021-03-16
SAX_EPI_ISL_1638814_2021-03-22
SAX_EPI_ISL_1638826_2021-03-26
SAX_EPI_ISL_1638837_2021-03-24
SAX_EPI_ISL_1638848_2021-03-25
SAX_EPI_ISL_1638855_2021-03-21
SAX_EPI_ISL_1638864_2021-03-22
SAX_EPI_ISL_1638882_2021-03-23
SAX_EPI_ISL_1638890_2021-03-27
SAX_EPI_ISL_1638903_2021-03-25
SAX_EPI_ISL_1638907_2021-03-18
SAX_EPI_ISL_1638914_2021-03-20
SAX_EPI_ISL_1638925_2021-03-22
SAX_EPI_ISL_1638935_2021-03-22
SAX_EPI_ISL_1638944_2021-03-25
SAX_EPI_ISL_1638951_2021-03-23
SAX_EPI_ISL_1638958_2021-03-22
SAX_EPI_ISL_1638961_2021-03-22
SAX_EPI_ISL_1638972_2021-03-23
SAX_EPI_ISL_1638983_2021-03-24
SAX_EPI_ISL_1639005_2021-03-24
SAX_EPI_ISL_1639038_2021-03-25
SAX_EPI_ISL_1639058_2021-03-22
SAX_EPI_ISL_1639073_2021-03-26
SAX_EPI_ISL_1639091_2021-03-27
SAX_EPI_ISL_1639105_2021-03-26
SAX_EPI_ISL_1639114_2021-03-22
SAX_EPI_ISL_1639139_2021-03-26
SAX_EPI_ISL_1639152_2021-03-24
SAX_EPI_ISL_1639168_2021-03-26
SAX_EPI_ISL_1639177_2021-03-25
SAX_EPI_ISL_1639192_2021-03-23
SAX_EPI_ISL_1639207_2021-03-24
SAX_EPI_ISL_1639223_2021-03-24
SAX_EPI_ISL_1639237_2021-03-25
SAX_EPI_ISL_1640122_2021-04-06
SAX_EPI_ISL_1640134_2021-04-06
SAX_EPI_ISL_1640173_2021-03-30
SAX_EPI_ISL_1640183_2021-04-01
SAX_EPI_ISL_1640205_2021-03-30
SAX_EPI_ISL_1640218_2021-03-31
SAX_EPI_ISL_1640237_2021-03-30
SAX_EPI_ISL_1640266_2021-04-01
SAX_EPI_ISL_1640273_2021-03-27
SAX_EPI_ISL_1642277_2021-04-03
SAX_EPI_ISL_1642284_2021-03-30
SAX_EPI_ISL_1642290_2021-03-30
SAX_EPI_ISL_1642297_2021-03-29
SAX_EPI_ISL_1642304_2021-04-02
SAX_EPI_ISL_1642370_2021-04-08
SAX_EPI_ISL_1642439_2021-04-01
SAX_EPI_ISL_1642470_2021-03-26
SAX_EPI_ISL_1642486_2021-03-26
SAX_EPI_ISL_1642517_2021-03-26
SAX_EPI_ISL_1642547_2021-03-27
SAX_EPI_ISL_1642620_2021-03-28
SAX_EPI_ISL_1642672_2021-03-30
SAX_EPI_ISL_1642728_2021-04-03
SAX_EPI_ISL_1643119_2021-03-29
SAX_EPI_ISL_1643152_2021-03-23
SAX_EPI_ISL_1643210_2021-03-22
SAX_EPI_ISL_1643274_2021-03-22
SAX_EPI_ISL_1643333_2021-03-31
SAX_EPI_ISL_1643387_2021-03-22
SAX_EPI_ISL_1643414_2021-04-09
SAX_EPI_ISL_1643781_2021-04-08
SAX_EPI_ISL_1644017_2021-04-12
SAX_EPI_ISL_1721110_2021-03-29
SAX_EPI_ISL_1721139_2021-03-29
SAX_EPI_ISL_1721175_2021-03-29
SAX_EPI_ISL_1721201_2021-03-29
SAX_EPI_ISL_1721235_2021-03-29
SAX_EPI_ISL_1721287_2021-03-29
SAX_EPI_ISL_1721324_2021-04-02
SAX_EPI_ISL_1721356_2021-04-02
SAX_EPI_ISL_1721384_2021-03-28
SAX_EPI_ISL_1721396_2021-03-30
SAX_EPI_ISL_1721406_2021-03-31
SAX_EPI_ISL_1721423_2021-04-01
SAX_EPI_ISL_1721438_2021-03-31
SAX_EPI_ISL_1721457_2021-04-01
SAX_EPI_ISL_1721463_2021-04-01
SAX_EPI_ISL_1721476_2021-04-01
SAX_EPI_ISL_1721488_2021-03-30
SAX_EPI_ISL_1721497_2021-04-01
SAX_EPI_ISL_1721507_2021-03-30
SAX_EPI_ISL_1721521_2021-03-31
SAX_EPI_ISL_1721533_2021-03-31
SAX_EPI_ISL_1721548_2021-03-29
SAX_EPI_ISL_1721562_2021-03-29
SAX_EPI_ISL_1721568_2021-03-29
SAX_EPI_ISL_1721581_2021-03-31
SAX_EPI_ISL_1721589_2021-01-31
SAX_EPI_ISL_1721601_2021-03-30
SAX_EPI_ISL_1721619_2021-04-01
SAX_EPI_ISL_1721628_2021-04-01
SAX_EPI_ISL_1721642_2021-03-30
SAX_EPI_ISL_1721650_2021-03-30
SAX_EPI_ISL_1721670_2021-03-31
SAX_EPI_ISL_1721684_2021-03-30
SAX_EPI_ISL_1721707_2021-03-30
SAX_EPI_ISL_1721733_2021-03-31
SAX_EPI_ISL_1721750_2021-04-01
SAX_EPI_ISL_1721774_2021-04-04
SAX_EPI_ISL_1721799_2021-03-31
SAX_EPI_ISL_1721823_2021-03-30
SAX_EPI_ISL_1721849_2021-03-30
SAX_EPI_ISL_1721871_2021-03-30
SAX_EPI_ISL_1721896_2021-03-30
SAX_EPI_ISL_1721947_2021-03-30
SAX_EPI_ISL_1722086_2021-04-06
SAX_EPI_ISL_1722094_2021-04-06
SAX_EPI_ISL_1722101_2021-04-06
SAX_EPI_ISL_1722108_2021-04-06
SAX_EPI_ISL_1722114_2021-04-06
SAX_EPI_ISL_1722120_2021-04-06
SAX_EPI_ISL_1722286_2021-04-04
SAX_EPI_ISL_1722293_2021-04-07
SAX_EPI_ISL_1722303_2021-04-06
SAX_EPI_ISL_1722315_2021-04-06
SAX_EPI_ISL_1722326_2021-04-06
SAX_EPI_ISL_1722335_2021-04-08
SAX_EPI_ISL_1722345_2021-04-07
SAX_EPI_ISL_1722353_2021-04-06
SAX_EPI_ISL_1724248_2021-04-12
SAX_EPI_ISL_1724330_2021-04-12
SAX_EPI_ISL_1724336_2021-04-12
SAX_EPI_ISL_1724342_2021-04-12
SAX_EPI_ISL_1724348_2021-04-12
SAX_EPI_ISL_1724354_2021-04-12
SAX_EPI_ISL_1724360_2021-04-12
SAX_EPI_ISL_1724366_2021-04-12
SAX_EPI_ISL_1724372_2021-04-12
SAX_EPI_ISL_1724379_2021-04-12
SAX_EPI_ISL_1724385_2021-04-12
SAX_EPI_ISL_1724392_2021-04-12
SAX_EPI_ISL_1725161_2021-04-09
SAX_EPI_ISL_1725167_2021-04-06
SAX_EPI_ISL_1725173_2021-04-10
SAX_EPI_ISL_1725239_2021-04-07
SAX_EPI_ISL_1725271_2021-04-15
SAX_EPI_ISL_1726980_2021-04-19
SAX_EPI_ISL_1727566_2021-04-15
SAX_EPI_ISL_1727575_2021-04-15
SAX_EPI_ISL_1842814_2021-04-09
SAX_EPI_ISL_1842966_2021-04-10
SAX_EPI_ISL_1842976_2021-04-06
SAX_EPI_ISL_1842989_2021-04-07
SAX_EPI_ISL_1842996_2021-04-06
SAX_EPI_ISL_1843007_2021-04-06
SAX_EPI_ISL_1843019_2021-04-07
SAX_EPI_ISL_1843031_2021-04-10
SAX_EPI_ISL_1843046_2021-04-07
SAX_EPI_ISL_1843060_2021-04-10
SAX_EPI_ISL_1843078_2021-04-10
SAX_EPI_ISL_1843094_2021-04-06
SAX_EPI_ISL_1843111_2021-04-08
SAX_EPI_ISL_1843128_2021-04-06
SAX_EPI_ISL_1843139_2021-04-07
SAX_EPI_ISL_1843148_2021-04-06
SAX_EPI_ISL_1843166_2021-04-08
SAX_EPI_ISL_1843425_2021-04-15
SAX_EPI_ISL_1843472_2021-04-15
SAX_EPI_ISL_1843494_2021-04-09
SAX_EPI_ISL_1843510_2021-04-07
SAX_EPI_ISL_1843530_2021-04-09
SAX_EPI_ISL_1843542_2021-04-08
SAX_EPI_ISL_1843560_2021-04-15
SAX_EPI_ISL_1843571_2021-04-07
SAX_EPI_ISL_1843578_2021-04-10
SAX_EPI_ISL_1843586_2021-04-09
SAX_EPI_ISL_1843597_2021-04-10
SAX_EPI_ISL_1843606_2021-04-09
SAX_EPI_ISL_1843620_2021-04-09
SAX_EPI_ISL_1843642_2021-04-09
SAX_EPI_ISL_1843655_2021-04-12
SAX_EPI_ISL_1843667_2021-04-09
SAX_EPI_ISL_1843690_2021-04-10
SAX_EPI_ISL_1843703_2021-04-11
SAX_EPI_ISL_1843710_2021-04-10
SAX_EPI_ISL_1844046_2021-04-05
SAX_EPI_ISL_1844089_2021-04-03
SAX_EPI_ISL_1844119_2021-04-08
SAX_EPI_ISL_1844142_2021-04-06
SAX_EPI_ISL_1844163_2021-04-05
SAX_EPI_ISL_1844189_2021-04-06
SAX_EPI_ISL_1844207_2021-04-13
SAX_EPI_ISL_1844229_2021-04-07
SAX_EPI_ISL_1844251_2021-04-10
SAX_EPI_ISL_1846236_2021-04-15
SAX_EPI_ISL_1846250_2021-04-08
SAX_EPI_ISL_1846259_2021-04-08
SAX_EPI_ISL_1846269_2021-04-08
SAX_EPI_ISL_1846279_2021-04-08
SAX_EPI_ISL_1846289_2021-04-08
SAX_EPI_ISL_1846299_2021-04-13
SAX_EPI_ISL_1846313_2021-04-08
SAX_EPI_ISL_1846368_2021-04-19
SAX_EPI_ISL_1846374_2021-04-19
SAX_EPI_ISL_1846376_2021-04-19
SAX_EPI_ISL_1846380_2021-04-19
SAX_EPI_ISL_1846386_2021-04-19
SAX_EPI_ISL_1846392_2021-04-19
SAX_EPI_ISL_1846399_2021-04-19
SAX_EPI_ISL_1846405_2021-04-19
SAX_EPI_ISL_1846411_2021-04-19
SAX_EPI_ISL_1846418_2021-04-19
SAX_EPI_ISL_1846425_2021-04-19
SAX_EPI_ISL_1846432_2021-04-19
SAX_EPI_ISL_1846438_2021-04-19
SAX_EPI_ISL_1846446_2021-04-19
SAX_EPI_ISL_1847122_2021-04-06
SAX_EPI_ISL_1847173_2021-04-19
SAX_EPI_ISL_1847235_2021-04-06
SAX_EPI_ISL_1847244_2021-04-06
SAX_EPI_ISL_1847251_2021-04-07
SAX_EPI_ISL_1847259_2021-04-09
SAX_EPI_ISL_1847267_2021-04-06
SAX_EPI_ISL_1847274_2021-04-06
SAX_EPI_ISL_1847285_2021-04-06
SAX_EPI_ISL_1847295_2021-04-06
SAX_EPI_ISL_1847301_2021-04-07
SAX_EPI_ISL_1847338_2021-04-15
SAX_EPI_ISL_1847344_2021-04-14
SAX_EPI_ISL_1847350_2021-04-16
SAX_EPI_ISL_1847357_2021-04-14
SAX_EPI_ISL_1847366_2021-04-14
SAX_EPI_ISL_1847373_2021-04-14
SAX_EPI_ISL_1847381_2021-04-15
SAX_EPI_ISL_1847514_2021-04-11
SAX_EPI_ISL_1848361_2021-04-19
SAX_EPI_ISL_1848413_2021-04-12
SAX_EPI_ISL_1848423_2021-04-15
SAX_EPI_ISL_1848441_2021-04-13
SAX_EPI_ISL_1848456_2021-04-11
SAX_EPI_ISL_1848470_2021-04-15
SAX_EPI_ISL_1848481_2021-04-15
SAX_EPI_ISL_1848500_2021-04-17
SAX_EPI_ISL_1848507_2021-04-15
SAX_EPI_ISL_1848522_2021-04-12
SAX_EPI_ISL_1848537_2021-04-16
SAX_EPI_ISL_1848546_2021-04-09
SAX_EPI_ISL_1848555_2021-04-13
SAX_EPI_ISL_1848563_2021-04-16
SAX_EPI_ISL_1848579_2021-04-16
SAX_EPI_ISL_1848588_2021-04-16
SAX_EPI_ISL_1848595_2021-04-12
SAX_EPI_ISL_1848602_2021-04-13
SAX_EPI_ISL_1848613_2021-04-14
SAX_EPI_ISL_1848624_2021-04-16
SAX_EPI_ISL_1848635_2021-04-16
SAX_EPI_ISL_1848648_2021-04-12
SAX_EPI_ISL_1848657_2021-04-11
SAX_EPI_ISL_1848667_2021-04-16
SAX_EPI_ISL_1848680_2021-04-13
SAX_EPI_ISL_1848688_2021-04-13
SAX_EPI_ISL_1848695_2021-04-16
SAX_EPI_ISL_1848703_2021-04-16
SAX_EPI_ISL_1848711_2021-04-12
SAX_EPI_ISL_1848721_2021-04-12
SAX_EPI_ISL_1848728_2021-04-13
SAX_EPI_ISL_1848740_2021-04-12
SAX_EPI_ISL_1848793_2021-04-22
SAX_EPI_ISL_1848829_2021-04-15
SAX_EPI_ISL_1848841_2021-04-15
SAX_EPI_ISL_1848849_2021-04-15
SAX_EPI_ISL_1848860_2021-04-15
SAX_EPI_ISL_1848869_2021-04-15
SAX_EPI_ISL_1848887_2021-04-14
SAX_EPI_ISL_1848898_2021-04-15
SAX_EPI_ISL_1848905_2021-04-15
SAX_EPI_ISL_1848934_2021-04-15
SAX_EPI_ISL_1848940_2021-04-15
SAX_EPI_ISL_1848949_2021-04-15
SAX_EPI_ISL_1848955_2021-04-15
SAX_EPI_ISL_1848965_2021-04-15
SAX_EPI_ISL_1851423_2021-04-22
SAX_EPI_ISL_1852057_2021-04-22
SAX_EPI_ISL_1852141_2021-04-21
SAX_EPI_ISL_1852456_2021-04-22
SAX_EPI_ISL_1852484_2021-04-22
SAX_EPI_ISL_2108726_2021-04-14
SAX_EPI_ISL_2108736_2021-04-12
SAX_EPI_ISL_2108757_2021-04-15
SAX_EPI_ISL_2108772_2021-04-20
SAX_EPI_ISL_2108781_2021-04-16
SAX_EPI_ISL_2108797_2021-04-16
SAX_EPI_ISL_2108827_2021-04-20
SAX_EPI_ISL_2108844_2021-04-15
SAX_EPI_ISL_2108855_2021-04-15
SAX_EPI_ISL_2108875_2021-04-16
SAX_EPI_ISL_2108896_2021-04-20
SAX_EPI_ISL_2108909_2021-04-13
SAX_EPI_ISL_2108944_2021-04-08
SAX_EPI_ISL_2108963_2021-04-14
SAX_EPI_ISL_2109042_2021-04-19
SAX_EPI_ISL_2109054_2021-04-17
SAX_EPI_ISL_2109086_2021-04-19
SAX_EPI_ISL_2109109_2021-04-19
SAX_EPI_ISL_2109138_2021-04-22
SAX_EPI_ISL_2109157_2021-04-17
SAX_EPI_ISL_2109172_2021-04-19
SAX_EPI_ISL_2109197_2021-04-22
SAX_EPI_ISL_2109212_2021-04-22
SAX_EPI_ISL_2109239_2021-04-19
SAX_EPI_ISL_2109253_2021-04-19
SAX_EPI_ISL_2109283_2021-04-09
SAX_EPI_ISL_2109342_2021-04-08
SAX_EPI_ISL_2109356_2021-04-21
SAX_EPI_ISL_2109363_2021-04-26
SAX_EPI_ISL_2109369_2021-04-26
SAX_EPI_ISL_2109376_2021-04-26
SAX_EPI_ISL_2109382_2021-04-26
SAX_EPI_ISL_2109388_2021-04-26
SAX_EPI_ISL_2109394_2021-04-26
SAX_EPI_ISL_2109400_2021-04-26
SAX_EPI_ISL_2109406_2021-04-26
SAX_EPI_ISL_2109412_2021-04-26
SAX_EPI_ISL_2109418_2021-04-12
SAX_EPI_ISL_2109424_2021-04-26
SAX_EPI_ISL_2109509_2021-04-24
SAX_EPI_ISL_2109530_2021-04-19
SAX_EPI_ISL_2109557_2021-04-24
SAX_EPI_ISL_2109588_2021-04-19
SAX_EPI_ISL_2109604_2021-04-23
SAX_EPI_ISL_2109627_2021-04-19
SAX_EPI_ISL_2109638_2021-04-19
SAX_EPI_ISL_2109653_2021-04-19
SAX_EPI_ISL_2109678_2021-04-19
SAX_EPI_ISL_2109719_2021-04-23
SAX_EPI_ISL_2109738_2021-04-20
SAX_EPI_ISL_2109762_2021-04-19
SAX_EPI_ISL_2109783_2021-04-18
SAX_EPI_ISL_2109800_2021-04-24
SAX_EPI_ISL_2109822_2021-04-20
SAX_EPI_ISL_2109840_2021-04-19
SAX_EPI_ISL_2109849_2021-04-20
SAX_EPI_ISL_2112482_2021-04-23
SAX_EPI_ISL_2112488_2021-04-20
SAX_EPI_ISL_2112765_2021-05-03
SAX_EPI_ISL_2113041_2021-04-25
SAX_EPI_ISL_2115155_2021-05-03
SAX_EPI_ISL_2115181_2021-05-03
SAX_EPI_ISL_2115211_2021-05-03
SAX_EPI_ISL_2115544_2021-04-21
SAX_EPI_ISL_2115597_2021-04-21
SAX_EPI_ISL_2115653_2021-04-22
SAX_EPI_ISL_2115738_2021-04-20
SAX_EPI_ISL_2115799_2021-04-11
SAX_EPI_ISL_2116045_2021-04-30
SAX_EPI_ISL_2116163_2021-04-19
SAX_EPI_ISL_2116173_2021-04-19
SAX_EPI_ISL_2116182_2021-04-19
SAX_EPI_ISL_2116190_2021-04-16
SAX_EPI_ISL_2116202_2021-04-19
SAX_EPI_ISL_2116211_2021-04-20
SAX_EPI_ISL_2116223_2021-03-26
SAX_EPI_ISL_2116230_2021-04-16
SAX_EPI_ISL_2116239_2021-04-20
SAX_EPI_ISL_2116247_2021-04-20
SAX_EPI_ISL_2116256_2021-04-19
SAX_EPI_ISL_2116264_2021-04-22
SAX_EPI_ISL_2116287_2021-04-21
SAX_EPI_ISL_2116299_2021-04-19
SAX_EPI_ISL_2116310_2021-04-20
SAX_EPI_ISL_2120408_2021-05-03
SAX_EPI_ISL_2120632_2021-04-26
SAX_EPI_ISL_2120674_2021-04-30
SAX_EPI_ISL_2120729_2021-04-25
SAX_EPI_ISL_2120832_2021-04-26
SAX_EPI_ISL_2120896_2021-04-22
SAX_EPI_ISL_2120982_2021-04-30
SAX_EPI_ISL_2121051_2021-04-26
SAX_EPI_ISL_2121130_2021-04-23
SAX_EPI_ISL_2121200_2021-04-30
SAX_EPI_ISL_2121363_2021-04-23
SAX_EPI_ISL_2121433_2021-04-23
SAX_EPI_ISL_2121452_2021-04-26
SAX_EPI_ISL_2121460_2021-04-21
SAX_EPI_ISL_2121477_2021-04-19
SAX_EPI_ISL_2121518_2021-04-22
SAX_EPI_ISL_2121544_2021-04-23
SAX_EPI_ISL_2121583_2021-04-21
SAX_EPI_ISL_2121610_2021-04-21
SAX_EPI_ISL_2121633_2021-04-23
SAX_EPI_ISL_2121652_2021-04-21
SAX_EPI_ISL_2121669_2021-04-24
SAX_EPI_ISL_2121689_2021-04-21
SAX_EPI_ISL_2121717_2021-04-22
SAX_EPI_ISL_2121736_2021-04-21
SAX_EPI_ISL_2121760_2021-04-21
SAX_EPI_ISL_2121803_2021-04-22
SAX_EPI_ISL_2121836_2021-04-21
SAX_EPI_ISL_2121868_2021-04-23
SAX_EPI_ISL_2121892_2021-04-22
SAX_EPI_ISL_2121913_2021-04-29
SAX_EPI_ISL_2121940_2021-04-23
SAX_EPI_ISL_2121967_2021-04-23
SAX_EPI_ISL_2121996_2021-04-22
SAX_EPI_ISL_2122025_2021-04-21
SAX_EPI_ISL_2122057_2021-04-21
SAX_EPI_ISL_2122099_2021-04-22
SAX_EPI_ISL_2122141_2021-04-23
SAX_EPI_ISL_2122175_2021-04-22
SAX_EPI_ISL_2122207_2021-04-22
SAX_EPI_ISL_2122247_2021-04-23
SAX_EPI_ISL_2122263_2021-04-24
SAX_EPI_ISL_2122270_2021-04-27
SAX_EPI_ISL_2122311_2021-04-23
SAX_EPI_ISL_2122793_2021-05-03
SAX_EPI_ISL_2122812_2021-05-03
SAX_EPI_ISL_2122831_2021-05-03
SAX_EPI_ISL_2122855_2021-05-03
SAX_EPI_ISL_2122873_2021-05-03
SAX_EPI_ISL_2122890_2021-05-03
SAX_EPI_ISL_2122907_2021-05-03
SAX_EPI_ISL_2122927_2021-05-03
SAX_EPI_ISL_2122939_2021-05-03
SAX_EPI_ISL_2122945_2021-05-03
SAX_EPI_ISL_2122951_2021-05-03
SAX_EPI_ISL_2123369_2021-05-03
SAX_EPI_ISL_2123832_2021-05-03
SAX_EPI_ISL_2124363_2021-05-06
SAX_EPI_ISL_2125027_2021-04-27
SAX_EPI_ISL_2125058_2021-05-06
SAX_EPI_ISL_2125144_2021-04-25
SAX_EPI_ISL_2125176_2021-04-28
SAX_EPI_ISL_2125303_2021-04-24
SAX_EPI_ISL_2125375_2021-04-30
SAX_EPI_ISL_2125483_2021-04-26
SAX_EPI_ISL_2125494_2021-04-27
SAX_EPI_ISL_2125539_2021-04-27
SAX_EPI_ISL_2125571_2021-04-27
SAX_EPI_ISL_2125601_2021-04-26
SAX_EPI_ISL_2125621_2021-04-28
SAX_EPI_ISL_2125663_2021-04-30
SAX_EPI_ISL_2125688_2021-04-27
SAX_EPI_ISL_2125735_2021-04-27
SAX_EPI_ISL_2125775_2021-04-30
SAX_EPI_ISL_2125781_2021-04-26
SAX_EPI_ISL_2125800_2021-05-03
SAX_EPI_ISL_2125852_2021-04-27
SAX_EPI_ISL_2125884_2021-04-28
SAX_EPI_ISL_2125935_2021-04-29
SAX_EPI_ISL_2125974_2021-04-29
SAX_EPI_ISL_2125998_2021-04-27
SAX_EPI_ISL_2126041_2021-04-26
SAX_EPI_ISL_2126073_2021-04-26
SAX_EPI_ISL_2126095_2021-04-30
SAX_EPI_ISL_2126131_2021-04-27
SAX_EPI_ISL_2126146_2021-04-28
SAX_EPI_ISL_2126174_2021-04-26
SAX_EPI_ISL_2128416_2021-04-23
SAX_EPI_ISL_2128432_2021-04-23
SAX_EPI_ISL_2128441_2021-04-24
SAX_EPI_ISL_2128449_2021-04-24
SAX_EPI_ISL_2128458_2021-04-26
SAX_EPI_ISL_2128475_2021-04-26
SAX_EPI_ISL_2128506_2021-04-24
SAX_EPI_ISL_2128540_2021-04-24
SAX_EPI_ISL_2128559_2021-04-26
SAX_EPI_ISL_2128577_2021-04-24
SAX_EPI_ISL_2128609_2021-04-24
SAX_EPI_ISL_2128618_2021-04-23
SAX_EPI_ISL_2128627_2021-04-27
SAX_EPI_ISL_2128636_2021-04-24
SAX_EPI_ISL_2260100_2021-04-30
SAX_EPI_ISL_2260114_2021-04-30
SAX_EPI_ISL_2260126_2021-05-06
SAX_EPI_ISL_2260135_2021-05-03
SAX_EPI_ISL_2260150_2021-04-29
SAX_EPI_ISL_2260166_2021-04-29
SAX_EPI_ISL_2260180_2021-05-03
SAX_EPI_ISL_2260193_2021-05-03
SAX_EPI_ISL_2260213_2021-05-03
SAX_EPI_ISL_2260224_2021-04-30
SAX_EPI_ISL_2260241_2021-05-01
SAX_EPI_ISL_2260259_2021-04-29
SAX_EPI_ISL_2260264_2021-05-01
SAX_EPI_ISL_2260284_2021-04-29
SAX_EPI_ISL_2260308_2021-04-30
SAX_EPI_ISL_2260329_2021-04-28
SAX_EPI_ISL_2260341_2021-04-29
SAX_EPI_ISL_2260351_2021-04-30
SAX_EPI_ISL_2260360_2021-05-02
SAX_EPI_ISL_2260378_2021-04-29
SAX_EPI_ISL_2260412_2021-05-04
SAX_EPI_ISL_2260611_2021-05-03
SAX_EPI_ISL_2260636_2021-05-04
SAX_EPI_ISL_2260677_2021-04-30
SAX_EPI_ISL_2260690_2021-05-03
SAX_EPI_ISL_2260704_2021-05-03
SAX_EPI_ISL_2260754_2021-05-03
SAX_EPI_ISL_2260769_2021-05-03
SAX_EPI_ISL_2260792_2021-05-05
SAX_EPI_ISL_2260842_2021-05-05
SAX_EPI_ISL_2260866_2021-04-29
SAX_EPI_ISL_2260884_2021-05-05
SAX_EPI_ISL_2260909_2021-05-03
SAX_EPI_ISL_2262308_2021-05-04
SAX_EPI_ISL_2262316_2021-05-06
SAX_EPI_ISL_2262323_2021-05-05
SAX_EPI_ISL_2262340_2021-05-10
SAX_EPI_ISL_2262346_2021-05-10
SAX_EPI_ISL_2262352_2021-05-10
SAX_EPI_ISL_2262358_2021-05-10
SAX_EPI_ISL_2262365_2021-05-10
SAX_EPI_ISL_2262372_2021-05-10
SAX_EPI_ISL_2262378_2021-05-10
SAX_EPI_ISL_2262385_2021-05-10
SAX_EPI_ISL_2262391_2021-05-10
SAX_EPI_ISL_2263153_2021-05-08
SAX_EPI_ISL_2263159_2021-05-10
SAX_EPI_ISL_2263166_2021-05-08
SAX_EPI_ISL_2263173_2021-05-08
SAX_EPI_ISL_2263180_2021-05-10
SAX_EPI_ISL_2264565_2021-05-05
SAX_EPI_ISL_2264625_2021-05-13
SAX_EPI_ISL_2264732_2021-05-13
SAX_EPI_ISL_2265544_2021-05-06
SAX_EPI_ISL_2265559_2021-05-06
SAX_EPI_ISL_2265571_2021-05-08
SAX_EPI_ISL_2265583_2021-05-08
SAX_EPI_ISL_2265598_2021-05-04
SAX_EPI_ISL_2265607_2021-05-07
SAX_EPI_ISL_2265629_2021-05-05
SAX_EPI_ISL_2265650_2021-05-06
SAX_EPI_ISL_2265665_2021-05-03
SAX_EPI_ISL_2265677_2021-05-06
SAX_EPI_ISL_2265690_2021-05-04
SAX_EPI_ISL_2265700_2021-05-07
SAX_EPI_ISL_2265714_2021-05-05
SAX_EPI_ISL_2265727_2021-05-06
SAX_EPI_ISL_2265739_2021-05-05
SAX_EPI_ISL_2265748_2021-05-07
SAX_EPI_ISL_2265761_2021-05-05
SAX_EPI_ISL_2265773_2021-05-04
SAX_EPI_ISL_2265780_2021-05-07
SAX_EPI_ISL_2265788_2021-05-03
SAX_EPI_ISL_2265802_2021-05-07
SAX_EPI_ISL_2265815_2021-05-07
SAX_EPI_ISL_2265824_2021-05-07
SAX_EPI_ISL_2265835_2021-05-04
SAX_EPI_ISL_2265843_2021-05-05
SAX_EPI_ISL_2265856_2021-05-06
SAX_EPI_ISL_2265868_2021-05-04
SAX_EPI_ISL_2267907_2021-05-14
SAX_EPI_ISL_2267913_2021-05-15
SAX_EPI_ISL_2267920_2021-05-15
SAX_EPI_ISL_2267927_2021-05-15
SAX_EPI_ISL_2313246_2021-05-17
SAX_EPI_ISL_2313386_2021-05-12
SAX_EPI_ISL_2313408_2021-05-12
SAX_EPI_ISL_2313423_2021-05-11
SAX_EPI_ISL_2313443_2021-05-10
SAX_EPI_ISL_2313461_2021-05-09
SAX_EPI_ISL_2313470_2021-05-11
SAX_EPI_ISL_2313500_2021-05-11
SAX_EPI_ISL_2313538_2021-05-12
SAX_EPI_ISL_2313581_2021-05-10
SAX_EPI_ISL_2313598_2021-05-12
SAX_EPI_ISL_2313625_2021-05-08
SAX_EPI_ISL_2313669_2021-05-10
SAX_EPI_ISL_2313694_2021-05-10
SAX_EPI_ISL_2313733_2021-05-09
SAX_EPI_ISL_2313770_2021-05-07
SAX_EPI_ISL_2313807_2021-05-10
SAX_EPI_ISL_2313853_2021-05-11
SAX_EPI_ISL_2313885_2021-05-13
SAX_EPI_ISL_2313905_2021-05-17
SAX_EPI_ISL_2313912_2021-05-17
SAX_EPI_ISL_2313918_2021-05-17
SAX_EPI_ISL_2313924_2021-05-17
SAX_EPI_ISL_2313930_2021-05-17
SAX_EPI_ISL_2313937_2021-05-17
SAX_EPI_ISL_2313943_2021-05-17
SAX_EPI_ISL_2313949_2021-05-17
SAX_EPI_ISL_2313956_2021-05-17
SAX_EPI_ISL_2314136_2021-05-12
SAX_EPI_ISL_2314216_2021-05-11
SAX_EPI_ISL_2314247_2021-05-12
SAX_EPI_ISL_2314499_2021-05-12
SAX_EPI_ISL_2314657_2021-05-19
SAX_EPI_ISL_2314909_2021-05-02
SAX_EPI_ISL_2314916_2021-05-07
SAX_EPI_ISL_2314926_2021-05-04
SAX_EPI_ISL_2314936_2021-05-07
SAX_EPI_ISL_2314944_2021-05-06
SAX_EPI_ISL_2314954_2021-05-02
SAX_EPI_ISL_2314963_2021-05-05
SAX_EPI_ISL_2314973_2021-05-05
SAX_EPI_ISL_2314984_2021-05-04
SAX_EPI_ISL_2314994_2021-05-04
SAX_EPI_ISL_2315023_2021-05-07
SAX_EPI_ISL_2315037_2021-05-05
SAX_EPI_ISL_2315592_2021-05-04
SAX_EPI_ISL_803894_2020-12-28
MVP_EPI_ISL_2123151_2021-04-19
MVP_EPI_ISL_2123206_2021-04-19
MVP_EPI_ISL_2123223_2021-04-19
MVP_EPI_ISL_2123160_2021-04-19
MVP_EPI_ISL_2123147_2021-04-19
MVP_EPI_ISL_2115371_2021-04-19
MVP_EPI_ISL_2123313_2021-04-19
MVP_EPI_ISL_2123130_2021-04-19
MVP_EPI_ISL_2123294_2021-04-19
MVP_EPI_ISL_2123329_2021-04-19
MVP_EPI_ISL_2108476_2021-04-19
MVP_EPI_ISL_2123326_2021-04-19
MVP_EPI_ISL_2108566_2021-04-19
MVP_EPI_ISL_2123185_2021-04-16
MVP_EPI_ISL_2108561_2021-04-16
MVP_EPI_ISL_2108588_2021-04-16
MVP_EPI_ISL_2123352_2021-04-16
MVP_EPI_ISL_2108551_2021-04-16
MVP_EPI_ISL_2123285_2021-04-16
MVP_EPI_ISL_2108497_2021-04-16
MVP_EPI_ISL_2123347_2021-04-16
MVP_EPI_ISL_2123179_2021-04-16
MVP_EPI_ISL_2108487_2021-04-16
MVP_EPI_ISL_2108648_2021-04-16
MVP_EPI_ISL_1843862_2021-04-14
MVP_EPI_ISL_2108659_2021-04-14
MVP_EPI_ISL_1844595_2021-04-14
MVP_EPI_ISL_2108610_2021-04-14
MVP_EPI_ISL_2123222_2021-04-14
MVP_EPI_ISL_1844000_2021-04-14
MVP_EPI_ISL_2108705_2021-04-14
MVP_EPI_ISL_2108623_2021-04-14
MVP_EPI_ISL_1843768_2021-04-14
MVP_EPI_ISL_2123331_2021-04-14
MVP_EPI_ISL_2108666_2021-04-15
MVP_EPI_ISL_2108493_2021-04-15
MVP_EPI_ISL_2108629_2021-04-15
MVP_EPI_ISL_2123175_2021-04-15
MVP_EPI_ISL_2108490_2021-04-15
MVP_EPI_ISL_2108581_2021-04-15
MVP_EPI_ISL_2108700_2021-04-15
MVP_EPI_ISL_2108565_2021-04-15
MVP_EPI_ISL_2108637_2021-04-15
MVP_EPI_ISL_1844020_2021-04-15
MVP_EPI_ISL_2123303_2021-04-17
MVP_EPI_ISL_2123167_2021-04-17
MVP_EPI_ISL_2123291_2021-04-17
MVP_EPI_ISL_2123110_2021-04-17
MVP_EPI_ISL_2123231_2021-04-17
MVP_EPI_ISL_2123307_2021-04-17
MVP_EPI_ISL_1843914_2021-04-17
MVP_EPI_ISL_1844012_2021-04-17
MVP_EPI_ISL_1843895_2021-04-17
MVP_EPI_ISL_1843804_2021-04-17
MVP_EPI_ISL_1843755_2021-04-18
MVP_EPI_ISL_1843773_2021-04-18
MVP_EPI_ISL_1843782_2021-04-18
MVP_EPI_ISL_1843786_2021-04-18
MVP_EPI_ISL_1843787_2021-04-18
MVP_EPI_ISL_1843814_2021-04-18
MVP_EPI_ISL_1843835_2021-04-18
MVP_EPI_ISL_1843851_2021-04-18
MVP_EPI_ISL_1843870_2021-04-18
MVP_EPI_ISL_1844016_2021-04-13
MVP_EPI_ISL_2123314_2021-04-13
MVP_EPI_ISL_1843938_2021-04-13
MVP_EPI_ISL_1843989_2021-04-13
MVP_EPI_ISL_2123090_2021-04-13
MVP_EPI_ISL_1843979_2021-04-13
MVP_EPI_ISL_1843821_2021-04-13
MVP_EPI_ISL_1843885_2021-04-13
MVP_EPI_ISL_1643684_2021-04-06
MVP_EPI_ISL_1722245_2021-04-06
MVP_EPI_ISL_1843968_2021-04-06
MVP_EPI_ISL_1643745_2021-04-06
MVP_EPI_ISL_1843876_2021-04-06
MVP_EPI_ISL_1843967_2021-04-09
MVP_EPI_ISL_1844021_2021-04-09
MVP_EPI_ISL_1843993_2021-04-09
MVP_EPI_ISL_1844502_2021-04-09
MVP_EPI_ISL_1843833_2021-04-09
MVP_EPI_ISL_2108484_2021-03-24
MVP_EPI_ISL_2108488_2021-03-24
MVP_EPI_ISL_2108489_2021-03-24
MVP_EPI_ISL_2108499_2021-03-24
MVP_EPI_ISL_2108537_2021-03-23
MVP_EPI_ISL_2108550_2021-03-23
MVP_EPI_ISL_2108683_2021-03-23
MVP_EPI_ISL_1843964_2021-04-05
MVP_EPI_ISL_1843917_2021-04-05
MVP_EPI_ISL_1843890_2021-04-05
MVP_EPI_ISL_1843884_2021-04-10
MVP_EPI_ISL_1843897_2021-04-10
MVP_EPI_ISL_1843805_2021-04-10
MVP_EPI_ISL_1843848_2021-04-12
MVP_EPI_ISL_1843737_2021-04-12
MVP_EPI_ISL_1843901_2021-04-12
MVP_EPI_ISL_1217375_2021-02-22
MVP_EPI_ISL_1282362_2021-02-22
MVP_EPI_ISL_1843873_2021-04-07
MVP_EPI_ISL_1843855_2021-04-07
MVP_EPI_ISL_1843998_2021-04-08
MVP_EPI_ISL_1843985_2021-04-08
MVP_EPI_ISL_1843963_2021-04-11
MVP_EPI_ISL_1843925_2021-04-11
MVP_EPI_ISL_2266166_2021-05-10
MVP_EPI_ISL_2266156_2021-05-10
MVP_EPI_ISL_1151944_2021-02-08
MVP_EPI_ISL_1151975_2021-02-01
MVP_EPI_ISL_1151990_2021-02-05
MVP_EPI_ISL_1156374_2021-02-17
MVP_EPI_ISL_1156378_2021-02-15
MVP_EPI_ISL_1156387_2021-02-12
MVP_EPI_ISL_1210786_2021-02-18
MVP_EPI_ISL_1210802_2021-02-16
MVP_EPI_ISL_1212025_2021-02-19
MVP_EPI_ISL_1217381_2021-02-24
MVP_EPI_ISL_1217393_2021-02-23
MVP_EPI_ISL_1282323_2021-02-26
MVP_EPI_ISL_1282328_2021-02-21
MVP_EPI_ISL_1282342_2021-02-25
MVP_EPI_ISL_1285749_2021-03-01
MVP_EPI_ISL_1285765_2021-03-04
MVP_EPI_ISL_1285776_2021-03-05
MVP_EPI_ISL_1285777_2021-03-02
MVP_EPI_ISL_1354299_2021-03-08
MVP_EPI_ISL_1354306_2021-03-09
MVP_EPI_ISL_1354326_2021-03-11
MVP_EPI_ISL_1439873_2021-03-17
MVP_EPI_ISL_1439875_2021-03-15
MVP_EPI_ISL_1439893_2021-03-16
MVP_EPI_ISL_1565415_2021-03-19
MVP_EPI_ISL_1565420_2021-03-18
MVP_EPI_ISL_1639280_2021-03-25
MVP_EPI_ISL_1639297_2021-03-26
MVP_EPI_ISL_1639439_2021-03-31
MVP_EPI_ISL_1639472_2021-03-29
MVP_EPI_ISL_1639506_2021-04-01
MVP_EPI_ISL_1643711_2021-04-04
MVP_EPI_ISL_1643730_2021-04-03
MVP_EPI_ISL_1721981_2021-03-30
MVP_EPI_ISL_1843829_2021-03-03
MVP_EPI_ISL_2107849_2021-04-29
MVP_EPI_ISL_2108424_2021-04-20
MVP_EPI_ISL_2108526_2021-03-21
MVP_EPI_ISL_2108562_2021-03-12
MVP_EPI_ISL_2108575_2021-03-20
MVP_EPI_ISL_2108688_2021-03-22
MVP_EPI_ISL_2109432_2021-04-21
MVP_EPI_ISL_2109452_2021-04-22
MVP_EPI_ISL_2109455_2021-04-23
MVP_EPI_ISL_2115373_2021-04-26
MVP_EPI_ISL_2115380_2021-04-27
MVP_EPI_ISL_2123191_2021-04-28
MVP_EPI_ISL_2123398_2021-04-30
MVP_EPI_ISL_2262406_2021-05-06
MVP_EPI_ISL_2262414_2021-05-04
MVP_EPI_ISL_2262421_2021-05-07
MVP_EPI_ISL_2314039_2021-05-17
MVP_EPI_ISL_2314042_2021-05-12
MVP_EPI_ISL_2314047_2021-05-11
LU_zarski_F_31-50_EPI_ISL_1341033_2021-02-08
LU_strzelecko-drezdencki_F_31-50_EPI_ISL_1341032_2021-02-08
LU_gorzowski_F_51-70_EPI_ISL_1341071_2021-02-09
LU_nowosolski_F_51-70_EPI_ISL_1341030_2021-02-10
LU_zaganski_F_31-50_EPI_ISL_1341043_2021-02-12
LU_zaganski_F_51-70_EPI_ISL_1341031_2021-02-13
LU_Gorzow_F_31-50_EPI_ISL_1341034_2021-02-15
LU_swidnicki_F_31-50_EPI_ISL_1341081_2021-02-18
LU_nowosolski_F_51-70_EPI_ISL_1341045_2021-03-01
LU_Gorzow_M_31-50_EPI_ISL_1341036_2021-03-04
LU_Z.Gora_F_31-50_EPI_ISL_1500087_2021-03-07
LU_zielonogorski_M_31-50_EPI_ISL_1410558_2021-03-10
LU_krosnienski_M_51-70_EPI_ISL_1410590_2021-03-10
LU_nowosolski_F_51-70_EPI_ISL_1410621_2021-03-10
LU_zielonogorskim_M_51-70_EPI_ISL_1410561_2021-03-10
LU_Z.Gora_F_18-30_EPI_ISL_1410577_2021-03-10
LU_Z.Gora_M_18-30_EPI_ISL_1410605_2021-03-10
LU_Z.Gora_F_31-50_EPI_ISL_1410587_2021-03-10
LU_Z.Gora_M_31-50_EPI_ISL_1410723_2021-03-10
LU_Z.Gora_M_31-50_EPI_ISL_1410608_2021-03-10
LU_Z.Gora_F_31-50_EPI_ISL_1410753_2021-03-10
LU_Z.Gora_F_31-50_EPI_ISL_1410585_2021-03-10
LU_Z.Gora_F_31-50_EPI_ISL_1410564_2021-03-10
LU_Z.Gora_F_31-50_EPI_ISL_1410545_2021-03-10
LU_Z.Gora_F_31-50_EPI_ISL_1410616_2021-03-10
LU_Z.Gora_M_31-50_EPI_ISL_1410538_2021-03-10
LU_Z.Gora_F_31-50_EPI_ISL_1410569_2021-03-10
LU_Z.Gora_M_31-50_EPI_ISL_1410629_2021-03-10
LU_Z.Gora_M_31-50_EPI_ISL_1410715_2021-03-10
LU_Z.Gora_M_31-50_EPI_ISL_1410618_2021-03-10
LU_Z.Gora_M_31-50_EPI_ISL_1410595_2021-03-10
LU_Z.Gora_F_31-50_EPI_ISL_1410592_2021-03-10
LU_Z.Gora_F_31-50_EPI_ISL_1410626_2021-03-10
LU_Z.Gora_M_31-50_EPI_ISL_1410720_2021-03-10
LU_Z.Gora_F_51-70_EPI_ISL_1410574_2021-03-10
LU_Z.Gora_M_51-70_EPI_ISL_1410640_2021-03-10
LU_Z.Gora_F_51-70_EPI_ISL_1410566_2021-03-10
LU_Z.Gora_F_51-70_EPI_ISL_1410725_2021-03-10
LU_Gorzow_F_u18_EPI_ISL_1538668_2021-03-12
LU_Gorzow_M_31-50_EPI_ISL_1538671_2021-03-12
LU_Gorzow_M_51-70_EPI_ISL_1538674_2021-03-12
LU_Gorzow_M_a70_EPI_ISL_1538670_2021-03-12
LU_Gorzow_F_a70_EPI_ISL_1538673_2021-03-12
LU_Gorzow_M_a70_EPI_ISL_1538675_2021-03-12
LU_Z.Gora_M_31-50_EPI_ISL_1410733_2021-03-12
LU_Z.Gora_M_51-70_EPI_ISL_1410643_2021-03-12
LU_Z.Gora_F_51-70_EPI_ISL_1538667_2021-03-13
LU_Z.Gora_M_a70_EPI_ISL_1538862_2021-03-13
LU_Z.Gora_M_a70_EPI_ISL_1538988_2021-03-13
LU_Z.Gora_M_a70_EPI_ISL_1538989_2021-03-13
LU_Z.Gora_M_u18_EPI_ISL_1538715_2021-03-15
LU_Z.Gora_M_a70_EPI_ISL_1539013_2021-03-15
LU_Z.Gora_M_a70_EPI_ISL_1538480_2021-03-15
LU_Z.Gora_F_a70_EPI_ISL_1538717_2021-03-15
LU_Z.Gora_F_31-50_EPI_ISL_1538713_2021-03-16
LU_Z.Gora_M_31-50_EPI_ISL_1538711_2021-03-16
LU_Z.Gora_F_51-70_EPI_ISL_1538708_2021-03-16
LU_Z.Gora_M_51-70_EPI_ISL_1538444_2021-03-16
LU_Gorzow_F_31-50_EPI_ISL_1538453_2021-03-17
LU_Gorzow_M_18-30_EPI_ISL_1622916_2021-03-18
LU_Gorzow_F_31-50_EPI_ISL_1538722_2021-03-18
LU_Gorzow_F_31-50_EPI_ISL_1538723_2021-03-18
LU_Gorzow_F_51-70_EPI_ISL_1538721_2021-03-18
LU_Gorzow_M_u18_EPI_ISL_1627724_2021-03-19
LU_Gorzow_M_31-50_EPI_ISL_1538470_2021-03-19
LU_Gorzow_F_31-50_EPI_ISL_1627723_2021-03-19
LU_Gorzow_F_51-70_EPI_ISL_1627721_2021-03-19
LU_Z.Gora_M_u18_EPI_ISL_1538712_2021-03-19
LU_Z.Gora_F_u18_EPI_ISL_1538709_2021-03-19
LU_Z.Gora_M_51-70_EPI_ISL_1538718_2021-03-19
LU_Z.Gora_F_a70_EPI_ISL_1538716_2021-03-19
LU_Z.Gora_F_a70_EPI_ISL_1538707_2021-03-19
LU_Z.Gora_M_a70_EPI_ISL_1538714_2021-03-19
LU_NA_F_31-50_EPI_ISL_1589053_2021-03-19
LU_Gorzow_F_u18_EPI_ISL_1627905_2021-03-20
LU_Gorzow_F_a70_EPI_ISL_1627722_2021-03-20
LU_NA_M_31-50_EPI_ISL_1589054_2021-03-20
LU_NA_M_31-50_EPI_ISL_1589055_2021-03-22
LU_Gorzow_M_u18_EPI_ISL_1627726_2021-03-23
LU_Gorzow_F_51-70_EPI_ISL_1627725_2021-03-23
LU_Z.Gora_F_u18_EPI_ISL_1627897_2021-03-23
LU_Z.Gora_F_31-50_EPI_ISL_1627585_2021-03-23
LU_Z.Gora_F_31-50_EPI_ISL_1627712_2021-03-23
LU_Z.Gora_M_51-70_EPI_ISL_1627714_2021-03-23
LU_Z.Gora_M_a70_EPI_ISL_1627711_2021-03-23
LU_Z.Gora_F_a70_EPI_ISL_1627713_2021-03-23
LU_strzelecko-drezdencki_F_31-50_EPI_ISL_1593308_2021-03-24
LU_Gorzow_F_31-50_EPI_ISL_1627728_2021-03-24
LU_Gorzow_M_51-70_EPI_ISL_1593309_2021-03-24
LU_Gorzow_F_51-70_EPI_ISL_1627729_2021-03-24
LU_Gorzow_F_51-70_EPI_ISL_1627727_2021-03-24
LU_Z.Gora_F_u18_EPI_ISL_1627716_2021-03-25
LU_Z.Gora_F_31-50_EPI_ISL_1627717_2021-03-25
LU_Z.Gora_M_a70_EPI_ISL_1627899_2021-03-25
LU_Z.Gora_F_a70_EPI_ISL_1627715_2021-03-25
LU_strzelecko-drezdencki_F_18-30_EPI_ISL_1593311_2021-03-26
LU_Gorzow_F_31-50_EPI_ISL_1593312_2021-03-26
LU_Gorzow_M_51-70_EPI_ISL_1593313_2021-03-26
LU_miedzyrzecki_F_a70_EPI_ISL_1593315_2021-03-26
LU_Z.Gora_M_18-30_EPI_ISL_1627902_2021-03-27
LU_Z.Gora_M_18-30_EPI_ISL_1627901_2021-03-27
LU_Z.Gora_F_51-70_EPI_ISL_1627900_2021-03-27
LU_Z.Gora_F_a70_EPI_ISL_1627718_2021-03-27
LU_Z.Gora_F_u18_EPI_ISL_1627719_2021-03-28
LU_Z.Gora_F_51-70_EPI_ISL_1627720_2021-03-28
LU_Z.Gora_M_51-70_EPI_ISL_1627903_2021-03-28
LU_Z.Gora_M_a70_EPI_ISL_1627904_2021-03-28
LU_Z.Gora_F_18-30_EPI_ISL_1745882_2021-03-29
LU_Z.Gora_F_51-70_EPI_ISL_1746090_2021-03-29
LU_Z.Gora_F_51-70_EPI_ISL_1745880_2021-03-29
LU_Z.Gora_F_51-70_EPI_ISL_1746089_2021-03-29
LU_Z.Gora_F_a70_EPI_ISL_1746113_2021-03-29
LU_Z.Gora_F_a70_EPI_ISL_1746088_2021-03-29
LU_Gorzow_F_31-50_EPI_ISL_1659564_2021-03-30
LU_Gorzow_F_18-30_EPI_ISL_1745893_2021-03-31
LU_Gorzow_M_31-50_EPI_ISL_1745898_2021-03-31
LU_Gorzow_F_31-50_EPI_ISL_1745896_2021-03-31
LU_Gorzow_F_51-70_EPI_ISL_1745894_2021-03-31
LU_Gorzow_M_51-70_EPI_ISL_1659565_2021-03-31
LU_Gorzow_M_a70_EPI_ISL_1745895_2021-03-31
LU_Z.Gora_M_u18_EPI_ISL_1745884_2021-04-01
LU_Z.Gora_F_31-50_EPI_ISL_1761381_2021-04-01
LU_Z.Gora_M_51-70_EPI_ISL_1745885_2021-04-01
LU_Z.Gora_F_51-70_EPI_ISL_1745887_2021-04-01
LU_Z.Gora_F_51-70_EPI_ISL_1745883_2021-04-01
LU_Z.Gora_F_51-70_EPI_ISL_1745891_2021-04-01
LU_Gorzow_F_51-70_EPI_ISL_1746664_2021-04-02
LU_Gorzow_F_51-70_EPI_ISL_1745900_2021-04-02
LU_Gorzow_F_a70_EPI_ISL_1746663_2021-04-02
LU_Gorzow_M_a70_EPI_ISL_1746665_2021-04-02
LU_Gorzow_F_a70_EPI_ISL_1745899_2021-04-02
LU_Gorzow_F_a70_EPI_ISL_1746093_2021-04-02
LU_miedzyrzecki_F_a70_EPI_ISL_1659563_2021-04-02
LU_miedzyrzecki_F_a70_EPI_ISL_1659566_2021-04-02
LU_miedzyrzecki_M_a70_EPI_ISL_1659562_2021-04-02
LU_slubidzki_F_51-70_EPI_ISL_1659560_2021-04-02
LU_slubidzki_F_a70_EPI_ISL_1659561_2021-04-02
LU_sulecinski_F_31-50_EPI_ISL_1659567_2021-04-02
LU_Z.Gora_F_51-70_EPI_ISL_1746091_2021-04-02
LU_Z.Gora_M_51-70_EPI_ISL_1745889_2021-04-02
LU_Z.Gora_F_a70_EPI_ISL_1745888_2021-04-02
LU_Z.Gora_M_a70_EPI_ISL_1746092_2021-04-02
LU_NA_M_31-50_EPI_ISL_1715267_2021-04-02
LU_NA_F_31-50_EPI_ISL_1715264_2021-04-02
LU_NA_M_51-70_EPI_ISL_1715269_2021-04-02
LU_NA_M_51-70_EPI_ISL_1715271_2021-04-02
LU_NA_M_51-70_EPI_ISL_1715265_2021-04-02
LU_NA_F_51-70_EPI_ISL_1715273_2021-04-02
LU_NA_M_a70_EPI_ISL_1715270_2021-04-02
LU_NA_M_a70_EPI_ISL_1715263_2021-04-02
LU_NA_F_a70_EPI_ISL_1715268_2021-04-02
LU_NA_M_u18_EPI_ISL_1715275_2021-04-07
LU_NA_F_18-30_EPI_ISL_1715276_2021-04-07
LU_NA_M_a70_EPI_ISL_1715280_2021-04-07
LU_NA_F_a70_EPI_ISL_1715278_2021-04-07
LU_NA_F_a70_EPI_ISL_1715277_2021-04-07
LU_Gorzow_M_31-50_EPI_ISL_1746660_2021-04-08
LU_Z.Gora_M_18-30_EPI_ISL_1761392_2021-04-08
LU_Z.Gora_F_51-70_EPI_ISL_1746651_2021-04-08
LU_Z.Gora_M_51-70_EPI_ISL_1746652_2021-04-08
LU_Z.Gora_M_51-70_EPI_ISL_1746779_2021-04-08
LU_Z.Gora_M_51-70_EPI_ISL_1746650_2021-04-08
LU_Z.Gora_F_a70_EPI_ISL_1746780_2021-04-08
LU_Z.Gora_F_a70_EPI_ISL_1746778_2021-04-08
LU_Z.Gora_M_18-30_EPI_ISL_1746658_2021-04-09
LU_Z.Gora_F_51-70_EPI_ISL_1746659_2021-04-09
LU_Z.Gora_F_51-70_EPI_ISL_1746657_2021-04-09
LU_Z.Gora_M_51-70_EPI_ISL_1746654_2021-04-09
LU_Z.Gora_F_a70_EPI_ISL_1746656_2021-04-09
LU_Z.Gora_F_a70_EPI_ISL_1746655_2021-04-09
LU_Gorzow_M_u18_EPI_ISL_1746661_2021-04-12
LU_Gorzow_F_31-50_EPI_ISL_1746499_2021-04-12
LU_Z.Gora_M_31-50_EPI_ISL_2161345_2021-04-12
LU_Z.Gora_F_31-50_EPI_ISL_2161342_2021-04-12
LU_Z.Gora_F_51-70_EPI_ISL_2161343_2021-04-12
LU_Z.Gora_F_51-70_EPI_ISL_2161344_2021-04-12
LU_Z.Gora_M_51-70_EPI_ISL_2161347_2021-04-12
LU_Z.Gora_F_a70_EPI_ISL_2161346_2021-04-12
LU_Gorzow_F_18-30_EPI_ISL_2161379_2021-04-13
LU_Gorzow_M_18-30_EPI_ISL_2161387_2021-04-13
LU_Gorzow_F_31-50_EPI_ISL_2161380_2021-04-13
LU_Gorzow_M_31-50_EPI_ISL_2161369_2021-04-13
LU_Gorzow_F_31-50_EPI_ISL_2161377_2021-04-13
LU_Gorzow_F_51-70_EPI_ISL_2161375_2021-04-13
LU_Gorzow_F_51-70_EPI_ISL_2161374_2021-04-13
LU_Gorzow_F_51-70_EPI_ISL_2161372_2021-04-13
LU_Gorzow_F_51-70_EPI_ISL_2161378_2021-04-13
LU_Gorzow_F_51-70_EPI_ISL_2161376_2021-04-13
LU_Gorzow_F_a70_EPI_ISL_2161370_2021-04-13
LU_Gorzow_F_18-30_EPI_ISL_2161388_2021-04-14
LU_Z.Gora_M_31-50_EPI_ISL_2161348_2021-04-14
LU_Z.Gora_M_31-50_EPI_ISL_2161349_2021-04-14
LU_Z.Gora_M_51-70_EPI_ISL_2161350_2021-04-14
LU_Z.Gora_F_51-70_EPI_ISL_2161353_2021-04-14
LU_Z.Gora_F_51-70_EPI_ISL_2161354_2021-04-14
LU_Z.Gora_F_51-70_EPI_ISL_2178746_2021-04-14
LU_Z.Gora_F_51-70_EPI_ISL_2161351_2021-04-14
LU_Gorzow_M_u18_EPI_ISL_2161383_2021-04-15
LU_Gorzow_F_31-50_EPI_ISL_2161381_2021-04-15
LU_Gorzow_M_51-70_EPI_ISL_2161386_2021-04-15
LU_Gorzow_M_a70_EPI_ISL_2161385_2021-04-15
LU_Gorzow_F_a70_EPI_ISL_2161384_2021-04-15
LU_Gorzow_F_a70_EPI_ISL_2161382_2021-04-15
LU_Z.Gora_F_18-30_EPI_ISL_2161357_2021-04-15
LU_Z.Gora_M_31-50_EPI_ISL_2161363_2021-04-15
LU_Z.Gora_F_51-70_EPI_ISL_2161366_2021-04-15
LU_Z.Gora_F_51-70_EPI_ISL_2161362_2021-04-15
LU_Z.Gora_M_51-70_EPI_ISL_2161367_2021-04-15
LU_Z.Gora_F_51-70_EPI_ISL_2161356_2021-04-15
LU_Z.Gora_F_51-70_EPI_ISL_2161359_2021-04-15
LU_Z.Gora_F_51-70_EPI_ISL_2161360_2021-04-15
LU_Z.Gora_F_a70_EPI_ISL_2161364_2021-04-15
LU_Z.Gora_F_a70_EPI_ISL_2161368_2021-04-15
LU_Z.Gora_F_a70_EPI_ISL_2161358_2021-04-15
LU_Z.Gora_M_a70_EPI_ISL_2161361_2021-04-15
LU_Z.Gora_F_a70_EPI_ISL_2161365_2021-04-15
LU_zielonogorski_F_51-70_EPI_ISL_1915258_2021-04-15
LU_nowosolski_F_18-30_EPI_ISL_1915241_2021-04-15
LU_nowosolski_F_31-50_EPI_ISL_1915248_2021-04-15
LU_Z.Gora_M_u18_EPI_ISL_1915229_2021-04-15
LU_Z.Gora_F_31-50_EPI_ISL_1915267_2021-04-15
LU_Z.Gora_F_31-50_EPI_ISL_1915226_2021-04-15
LU_Z.Gora_M_51-70_EPI_ISL_1915212_2021-04-15
LU_Z.Gora_M_51-70_EPI_ISL_1915211_2021-04-15
LU_Z.Gora_F_51-70_EPI_ISL_1915223_2021-04-15
LU_Z.Gora_M_51-70_EPI_ISL_1915234_2021-04-15
LU_Z.Gora_F_51-70_EPI_ISL_1915278_2021-04-15
LU_Z.Gora_F_a70_EPI_ISL_1915208_2021-04-15
LU_krosnienski_M_51-70_EPI_ISL_1915218_2021-04-18
LU_Z.Gora_F_18-30_EPI_ISL_1915264_2021-04-18
LU_Z.Gora_M_31-50_EPI_ISL_1915249_2021-04-18
LU_Z.Gora_M_51-70_EPI_ISL_1915266_2021-04-18
LU_Gorzow_F_51-70_EPI_ISL_2142216_2021-04-20
LU_Gorzow_F_51-70_EPI_ISL_2142213_2021-04-20
LU_Gorzow_F_a70_EPI_ISL_2142225_2021-04-20
LU_Gorzow_M_31-50_EPI_ISL_2142245_2021-04-21
LU_Gorzow_F_31-50_EPI_ISL_2142238_2021-04-21
LU_Gorzow_M_51-70_EPI_ISL_2142228_2021-04-21
LU_Gorzow_M_51-70_EPI_ISL_2142237_2021-04-21
LU_Gorzow_F_a70_EPI_ISL_2142236_2021-04-21
LU_Z.Gora_M_31-50_EPI_ISL_2142212_2021-04-21
LU_Z.Gora_F_31-50_EPI_ISL_2142210_2021-04-21
LU_Z.Gora_M_51-70_EPI_ISL_2142209_2021-04-21
LU_Z.Gora_M_a70_EPI_ISL_2142211_2021-04-21
LU_Gorzow_F_18-30_EPI_ISL_2142244_2021-04-22
LU_Gorzow_F_51-70_EPI_ISL_2142240_2021-04-22
LU_Gorzow_F_51-70_EPI_ISL_2142241_2021-04-22
LU_Gorzow_M_51-70_EPI_ISL_2142242_2021-04-22
LU_Gorzow_M_a70_EPI_ISL_2142243_2021-04-22
LU_Gorzow_M_a70_EPI_ISL_2142239_2021-04-22
LU_Z.Gora_F_u18_EPI_ISL_2158331_2021-04-22
LU_Z.Gora_M_18-30_EPI_ISL_2142220_2021-04-22
LU_Z.Gora_M_31-50_EPI_ISL_2158336_2021-04-22
LU_Z.Gora_M_51-70_EPI_ISL_2142219_2021-04-22
LU_Z.Gora_F_51-70_EPI_ISL_2142224_2021-04-22
LU_Z.Gora_F_51-70_EPI_ISL_2142221_2021-04-22
LU_Z.Gora_F_a70_EPI_ISL_2142223_2021-04-22
LU_Z.Gora_F_a70_EPI_ISL_2142222_2021-04-22
LU_Z.Gora_M_u18_EPI_ISL_2142234_2021-04-23
LU_Z.Gora_F_31-50_EPI_ISL_2142230_2021-04-23
LU_Z.Gora_M_51-70_EPI_ISL_2158332_2021-04-23
LU_Z.Gora_F_51-70_EPI_ISL_2142232_2021-04-23
LU_Z.Gora_F_a70_EPI_ISL_2142229_2021-04-23
LU_Gorzow_M_NA_EPI_ISL_2142246_2021-04-25
BRA_EPI_ISL_1844543_2021-04-12
BRA_EPI_ISL_1844587_2021-04-12
BRA_EPI_ISL_1844586_2021-04-12
BRA_EPI_ISL_1722274_2021-04-12
BRA_EPI_ISL_1722276_2021-04-12
BRA_EPI_ISL_1722265_2021-04-12
BRA_EPI_ISL_1844548_2021-04-12
BRA_EPI_ISL_1722268_2021-04-12
BRA_EPI_ISL_1844589_2021-04-12
BRA_EPI_ISL_1844576_2021-04-12
BRA_EPI_ISL_1844551_2021-04-12
BRA_EPI_ISL_1844574_2021-04-12
BRA_EPI_ISL_1844566_2021-04-12
BRA_EPI_ISL_1844570_2021-04-12
BRA_EPI_ISL_1844603_2021-04-12
BRA_EPI_ISL_2109481_2021-04-19
BRA_EPI_ISL_2109446_2021-04-19
BRA_EPI_ISL_1844276_2021-04-19
BRA_EPI_ISL_2109449_2021-04-19
BRA_EPI_ISL_2109479_2021-04-19
BRA_EPI_ISL_1726935_2021-04-19
BRA_EPI_ISL_1726936_2021-04-19
BRA_EPI_ISL_1844278_2021-04-19
BRA_EPI_ISL_2109434_2021-04-19
BRA_EPI_ISL_1726930_2021-04-19
BRA_EPI_ISL_1726923_2021-04-19
BRA_EPI_ISL_2109428_2021-04-19
BRA_EPI_ISL_1726933_2021-04-19
BRA_EPI_ISL_2109498_2021-04-19
BRA_EPI_ISL_2109439_2021-04-19
BRA_EPI_ISL_1722256_2021-04-06
BRA_EPI_ISL_1722174_2021-04-06
BRA_EPI_ISL_1722224_2021-04-06
BRA_EPI_ISL_1722235_2021-04-06
BRA_EPI_ISL_1722207_2021-04-06
BRA_EPI_ISL_1722183_2021-04-06
BRA_EPI_ISL_1722936_2021-04-06
BRA_EPI_ISL_1724470_2021-04-06
BRA_EPI_ISL_1722226_2021-04-06
BRA_EPI_ISL_1722258_2021-04-06
BRA_EPI_ISL_1722254_2021-04-06
BRA_EPI_ISL_1722251_2021-04-06
BRA_EPI_ISL_1722187_2021-04-06
BRA_EPI_ISL_1724468_2021-04-06
BRA_EPI_ISL_1357264_2021-03-15
BRA_EPI_ISL_1435867_2021-03-15
BRA_EPI_ISL_1435852_2021-03-15
BRA_EPI_ISL_1435889_2021-03-15
BRA_EPI_ISL_1435875_2021-03-15
BRA_EPI_ISL_1357243_2021-03-15
BRA_EPI_ISL_1982522_2021-03-15
BRA_EPI_ISL_1435866_2021-03-15
BRA_EPI_ISL_1435857_2021-03-15
BRA_EPI_ISL_1357247_2021-03-15
BRA_EPI_ISL_1435880_2021-03-15
BRA_EPI_ISL_1357239_2021-03-15
BRA_EPI_ISL_1357257_2021-03-15
BRA_EPI_ISL_1285740_2021-03-05
BRA_EPI_ISL_1282759_2021-03-05
BRA_EPI_ISL_1285772_2021-03-05
BRA_EPI_ISL_1285755_2021-03-05
BRA_EPI_ISL_1282764_2021-03-05
BRA_EPI_ISL_1285762_2021-03-05
BRA_EPI_ISL_1282756_2021-03-05
BRA_EPI_ISL_1354291_2021-03-05
BRA_EPI_ISL_1282758_2021-03-05
BRA_EPI_ISL_1285788_2021-03-05
BRA_EPI_ISL_1285744_2021-03-05
BRA_EPI_ISL_1722252_2021-04-07
BRA_EPI_ISL_1722192_2021-04-07
BRA_EPI_ISL_1722206_2021-04-07
BRA_EPI_ISL_1722205_2021-04-07
BRA_EPI_ISL_1722218_2021-04-07
BRA_EPI_ISL_1722194_2021-04-07
BRA_EPI_ISL_1722253_2021-04-07
BRA_EPI_ISL_1722188_2021-04-07
BRA_EPI_ISL_1722255_2021-04-07
BRA_EPI_ISL_1724472_2021-04-07
BRA_EPI_ISL_1349234_2021-03-10
BRA_EPI_ISL_1349239_2021-03-10
BRA_EPI_ISL_1349235_2021-03-10
BRA_EPI_ISL_1354363_2021-03-10
BRA_EPI_ISL_1349227_2021-03-10
BRA_EPI_ISL_1354330_2021-03-10
BRA_EPI_ISL_1349241_2021-03-10
BRA_EPI_ISL_1349230_2021-03-10
BRA_EPI_ISL_1354351_2021-03-10
BRA_EPI_ISL_1982548_2021-03-22
BRA_EPI_ISL_1565447_2021-03-22
BRA_EPI_ISL_1565434_2021-03-22
BRA_EPI_ISL_1565461_2021-03-22
BRA_EPI_ISL_1565414_2021-03-22
BRA_EPI_ISL_1442542_2021-03-22
BRA_EPI_ISL_1565454_2021-03-22
BRA_EPI_ISL_1442541_2021-03-22
BRA_EPI_ISL_1565427_2021-03-22
BRA_EPI_ISL_1282321_2021-03-01
BRA_EPI_ISL_1218197_2021-03-01
BRA_EPI_ISL_1218193_2021-03-01
BRA_EPI_ISL_1285795_2021-03-01
BRA_EPI_ISL_1282335_2021-03-01
BRA_EPI_ISL_1218190_2021-03-01
BRA_EPI_ISL_1218198_2021-03-01
BRA_EPI_ISL_1285770_2021-03-01
BRA_EPI_ISL_1285166_2021-03-08
BRA_EPI_ISL_1354302_2021-03-08
BRA_EPI_ISL_1354346_2021-03-08
BRA_EPI_ISL_1354310_2021-03-08
BRA_EPI_ISL_1354338_2021-03-08
BRA_EPI_ISL_1354297_2021-03-08
BRA_EPI_ISL_1285174_2021-03-08
BRA_EPI_ISL_1354318_2021-03-08
BRA_EPI_ISL_1570771_2021-03-25
BRA_EPI_ISL_1570809_2021-03-25
BRA_EPI_ISL_1639315_2021-03-25
BRA_EPI_ISL_1639312_2021-03-25
BRA_EPI_ISL_1570765_2021-03-25
BRA_EPI_ISL_1570767_2021-03-25
BRA_EPI_ISL_1570757_2021-03-25
BRA_EPI_ISL_1643689_2021-03-25
BRA_EPI_ISL_1643747_2021-03-29
BRA_EPI_ISL_1570803_2021-03-29
BRA_EPI_ISL_1643754_2021-03-29
BRA_EPI_ISL_1570785_2021-03-29
BRA_EPI_ISL_1643739_2021-03-29
BRA_EPI_ISL_1643738_2021-03-29
BRA_EPI_ISL_1972164_2021-03-29
BRA_EPI_ISL_1643744_2021-03-29
BRA_EPI_ISL_2314051_2021-05-10
BRA_EPI_ISL_2314058_2021-05-10
BRA_EPI_ISL_2314059_2021-05-10
BRA_EPI_ISL_2314073_2021-05-10
BRA_EPI_ISL_2314062_2021-05-10
BRA_EPI_ISL_2264753_2021-05-10
BRA_EPI_ISL_2264758_2021-05-10
BRA_EPI_ISL_2314057_2021-05-10
BRA_EPI_ISL_1217398_2021-02-24
BRA_EPI_ISL_1218196_2021-02-24
BRA_EPI_ISL_1212038_2021-02-24
BRA_EPI_ISL_1212043_2021-02-24
BRA_EPI_ISL_1217394_2021-02-24
BRA_EPI_ISL_1212059_2021-02-24
BRA_EPI_ISL_1217390_2021-02-24
BRA_EPI_ISL_1354313_2021-03-09
BRA_EPI_ISL_1354317_2021-03-09
BRA_EPI_ISL_1354350_2021-03-09
BRA_EPI_ISL_1354307_2021-03-09
BRA_EPI_ISL_1354284_2021-03-09
BRA_EPI_ISL_1285170_2021-03-09
BRA_EPI_ISL_1285172_2021-03-09
BRA_EPI_ISL_1722266_2021-03-26
BRA_EPI_ISL_1570788_2021-03-26
BRA_EPI_ISL_1722275_2021-03-26
BRA_EPI_ISL_1570798_2021-03-26
BRA_EPI_ISL_1972161_2021-03-26
BRA_EPI_ISL_1643686_2021-03-26
BRA_EPI_ISL_1570769_2021-03-30
BRA_EPI_ISL_1844605_2021-04-13
BRA_EPI_ISL_1844600_2021-04-13
BRA_EPI_ISL_1844572_2021-04-13
BRA_EPI_ISL_1844528_2021-04-13
BRA_EPI_ISL_1844541_2021-04-13
BRA_EPI_ISL_1722260_2021-04-13
BRA_EPI_ISL_1724483_2021-04-13
BRA_EPI_ISL_1210799_2021-02-19
BRA_EPI_ISL_1217408_2021-02-19
BRA_EPI_ISL_1218058_2021-02-19
BRA_EPI_ISL_1218022_2021-02-19
BRA_EPI_ISL_1218104_2021-02-19
BRA_EPI_ISL_1218065_2021-02-19
BRA_EPI_ISL_1212050_2021-02-25
BRA_EPI_ISL_1218192_2021-02-25
BRA_EPI_ISL_1212031_2021-02-25
BRA_EPI_ISL_1285778_2021-02-25
BRA_EPI_ISL_1217362_2021-02-25
BRA_EPI_ISL_1212026_2021-02-25
BRA_EPI_ISL_1573068_2021-04-01
BRA_EPI_ISL_1573066_2021-04-01
BRA_EPI_ISL_1643740_2021-04-01
BRA_EPI_ISL_1573059_2021-04-01
BRA_EPI_ISL_1643704_2021-04-01
BRA_EPI_ISL_1573058_2021-04-01
BRA_EPI_ISL_1849338_2021-04-22
BRA_EPI_ISL_1849344_2021-04-22
BRA_EPI_ISL_2109462_2021-04-22
BRA_EPI_ISL_1849341_2021-04-22
BRA_EPI_ISL_1849334_2021-04-22
BRA_EPI_ISL_2109484_2021-04-22
BRA_EPI_ISL_2110827_2021-04-27
BRA_EPI_ISL_2110831_2021-04-27
BRA_EPI_ISL_2110861_2021-04-27
BRA_EPI_ISL_2123396_2021-04-27
BRA_EPI_ISL_2110829_2021-04-27
BRA_EPI_ISL_2116057_2021-04-27
BRA_EPI_ISL_2264760_2021-05-11
BRA_EPI_ISL_2314068_2021-05-11
BRA_EPI_ISL_2264743_2021-05-11
BRA_EPI_ISL_2314056_2021-05-11
BRA_EPI_ISL_2264807_2021-05-11
BRA_EPI_ISL_2314063_2021-05-11
BRA_EPI_ISL_2314055_2021-05-12
BRA_EPI_ISL_2264774_2021-05-12
BRA_EPI_ISL_2314040_2021-05-12
BRA_EPI_ISL_2264768_2021-05-12
BRA_EPI_ISL_2314050_2021-05-12
BRA_EPI_ISL_2264783_2021-05-12
BRA_EPI_ISL_1156436_2021-02-15
BRA_EPI_ISL_1156401_2021-02-15
BRA_EPI_ISL_1156389_2021-02-15
BRA_EPI_ISL_1989389_2021-02-15
BRA_EPI_ISL_1989430_2021-02-15
BRA_EPI_ISL_1989448_2021-02-23
BRA_EPI_ISL_1218100_2021-02-23
BRA_EPI_ISL_1218056_2021-02-23
BRA_EPI_ISL_1218034_2021-02-23
BRA_EPI_ISL_1217396_2021-02-23
BRA_EPI_ISL_1570751_2021-03-24
BRA_EPI_ISL_1570792_2021-03-24
BRA_EPI_ISL_1570753_2021-03-24
BRA_EPI_ISL_1570755_2021-03-24
BRA_EPI_ISL_1639296_2021-03-24
BRA_EPI_ISL_1643743_2021-03-31
BRA_EPI_ISL_1643702_2021-03-31
BRA_EPI_ISL_1573061_2021-03-31
BRA_EPI_ISL_1573057_2021-03-31
BRA_EPI_ISL_1643701_2021-03-31
BRA_EPI_ISL_1844546_2021-04-14
BRA_EPI_ISL_1724482_2021-04-14
BRA_EPI_ISL_1844575_2021-04-14
BRA_EPI_ISL_1844579_2021-04-14
BRA_EPI_ISL_1844549_2021-04-14
BRA_EPI_ISL_2109447_2021-04-16
BRA_EPI_ISL_2109427_2021-04-16
BRA_EPI_ISL_2109437_2021-04-16
BRA_EPI_ISL_1726934_2021-04-16
BRA_EPI_ISL_1726926_2021-04-16
BRA_EPI_ISL_1849346_2021-04-23
BRA_EPI_ISL_1849347_2021-04-23
BRA_EPI_ISL_2123415_2021-04-23
BRA_EPI_ISL_1849328_2021-04-23
BRA_EPI_ISL_2123402_2021-04-23
BRA_EPI_ISL_2110855_2021-04-28
BRA_EPI_ISL_2116068_2021-04-28
BRA_EPI_ISL_2110828_2021-04-28
BRA_EPI_ISL_2116070_2021-04-28
BRA_EPI_ISL_2116069_2021-04-28
BRA_EPI_ISL_2116062_2021-04-29
BRA_EPI_ISL_2107843_2021-04-29
BRA_EPI_ISL_2123409_2021-04-29
BRA_EPI_ISL_2123400_2021-04-29
BRA_EPI_ISL_2116063_2021-04-29
BRA_EPI_ISL_1156376_2021-02-16
BRA_EPI_ISL_1210811_2021-02-16
BRA_EPI_ISL_1156424_2021-02-16
BRA_EPI_ISL_1218064_2021-02-16
BRA_EPI_ISL_1156395_2021-02-17
BRA_EPI_ISL_1218052_2021-02-17
BRA_EPI_ISL_1156753_2021-02-17
BRA_EPI_ISL_1156409_2021-02-17
BRA_EPI_ISL_1218020_2021-02-22
BRA_EPI_ISL_1218033_2021-02-22
BRA_EPI_ISL_1218024_2021-02-22
BRA_EPI_ISL_1218047_2021-02-22
BRA_EPI_ISL_1285754_2021-02-28
BRA_EPI_ISL_1285784_2021-02-28
BRA_EPI_ISL_1285792_2021-02-28
BRA_EPI_ISL_1282324_2021-02-28
BRA_EPI_ISL_1354290_2021-03-03
BRA_EPI_ISL_1282762_2021-03-03
BRA_EPI_ISL_1282340_2021-03-03
BRA_EPI_ISL_1282755_2021-03-03
BRA_EPI_ISL_1357261_2021-03-16
BRA_EPI_ISL_1357259_2021-03-16
BRA_EPI_ISL_1357248_2021-03-16
BRA_EPI_ISL_1439881_2021-03-16
BRA_EPI_ISL_1357258_2021-03-19
BRA_EPI_ISL_1565491_2021-03-19
BRA_EPI_ISL_1357246_2021-03-19
BRA_EPI_ISL_1442531_2021-03-19
BRA_EPI_ISL_1722236_2021-04-05
BRA_EPI_ISL_1573069_2021-04-05
BRA_EPI_ISL_1573060_2021-04-05
BRA_EPI_ISL_1722181_2021-04-05
BRA_EPI_ISL_1724463_2021-04-15
BRA_EPI_ISL_2109482_2021-04-15
BRA_EPI_ISL_1724480_2021-04-15
BRA_EPI_ISL_1724473_2021-04-15
BRA_EPI_ISL_1844275_2021-04-20
BRA_EPI_ISL_2109445_2021-04-20
BRA_EPI_ISL_2109486_2021-04-20
BRA_EPI_ISL_1844282_2021-04-20
BRA_EPI_ISL_1844280_2021-04-21
BRA_EPI_ISL_1844274_2021-04-21
BRA_EPI_ISL_2109458_2021-04-21
BRA_EPI_ISL_2109443_2021-04-21
BRA_EPI_ISL_2262403_2021-05-03
BRA_EPI_ISL_2262416_2021-05-03
BRA_EPI_ISL_2116075_2021-05-03
BRA_EPI_ISL_2116081_2021-05-03
BRA_EPI_ISL_2316622_2021-05-17
BRA_EPI_ISL_2264776_2021-05-17
BRA_EPI_ISL_2264803_2021-05-17
BRA_EPI_ISL_2264790_2021-05-17
BRA_EPI_ISL_1156394_2021-02-18
BRA_EPI_ISL_1210779_2021-02-18
BRA_EPI_ISL_1156413_2021-02-18
BRA_EPI_ISL_1211130_2021-02-20
BRA_EPI_ISL_1217989_2021-02-20
BRA_EPI_ISL_1218025_2021-02-20
BRA_EPI_ISL_1285734_2021-03-04
BRA_EPI_ISL_1285785_2021-03-04
BRA_EPI_ISL_1285781_2021-03-04
BRA_EPI_ISL_1435855_2021-03-12
BRA_EPI_ISL_1349237_2021-03-12
BRA_EPI_ISL_1349233_2021-03-12
BRA_EPI_ISL_1357250_2021-03-18
BRA_EPI_ISL_1357244_2021-03-18
BRA_EPI_ISL_1442538_2021-03-18
BRA_EPI_ISL_1570777_2021-03-23
BRA_EPI_ISL_1573063_2021-03-23
BRA_EPI_ISL_1442535_2021-03-23
BRA_EPI_ISL_1844558_2021-04-08
BRA_EPI_ISL_1724461_2021-04-08
BRA_EPI_ISL_1722203_2021-04-08
BRA_EPI_ISL_2123397_2021-04-26
BRA_EPI_ISL_2110833_2021-04-26
BRA_EPI_ISL_2110844_2021-04-26
BRA_EPI_ISL_2123388_2021-04-30
BRA_EPI_ISL_2123395_2021-04-30
BRA_EPI_ISL_2116073_2021-04-30
BRA_EPI_ISL_2262426_2021-05-04
BRA_EPI_ISL_2262434_2021-05-04
BRA_EPI_ISL_2262431_2021-05-04
BRA_EPI_ISL_2116085_2021-05-05
BRA_EPI_ISL_2262413_2021-05-05
BRA_EPI_ISL_2262409_2021-05-05
BRA_EPI_ISL_2264742_2021-05-06
BRA_EPI_ISL_2264748_2021-05-06
BRA_EPI_ISL_2264759_2021-05-06
BRA_EPI_ISL_2314070_2021-05-07
BRA_EPI_ISL_2264741_2021-05-07
BRA_EPI_ISL_2264761_2021-05-07
BRA_EPI_ISL_1151947_2021-02-05
BRA_EPI_ISL_1151958_2021-02-05
BRA_EPI_ISL_1989533_2021-02-09
BRA_EPI_ISL_1218059_2021-02-09
BRA_EPI_ISL_1151936_2021-02-10
BRA_EPI_ISL_1217975_2021-02-10
BRA_EPI_ISL_1989514_2021-02-11
BRA_EPI_ISL_1989411_2021-02-11
BRA_EPI_ISL_1989537_2021-02-12
BRA_EPI_ISL_1211250_2021-02-12
BRA_EPI_ISL_1439900_2021-03-17
BRA_EPI_ISL_1357252_2021-03-17
BRA_EPI_ISL_1643733_2021-04-03
BRA_EPI_ISL_1573075_2021-04-03
BRA_EPI_ISL_1573074_2021-04-04
BRA_EPI_ISL_1573065_2021-04-04
BRA_EPI_ISL_1844571_2021-04-09
BRA_EPI_ISL_1722934_2021-04-09
BRA_EPI_ISL_1724460_2021-04-10
BRA_EPI_ISL_1722935_2021-04-10
BRA_EPI_ISL_1726927_2021-04-17
BRA_EPI_ISL_1726925_2021-04-17
BRA_EPI_ISL_2264805_2021-05-14
BRA_EPI_ISL_2264765_2021-05-14
BRA_EPI_ISL_1147414_2021-02-02
BRA_EPI_ISL_1147416_2021-02-04
BRA_EPI_ISL_1147566_2021-01-21
BRA_EPI_ISL_1151904_2021-02-01
BRA_EPI_ISL_1217364_2021-02-14
BRA_EPI_ISL_1218014_2021-02-21
BRA_EPI_ISL_1218037_2021-01-31
BRA_EPI_ISL_1218044_2021-02-06
BRA_EPI_ISL_1218067_2021-02-07
BRA_EPI_ISL_1218082_2021-02-08
BRA_EPI_ISL_1282351_2021-03-02
BRA_EPI_ISL_1282367_2021-02-27
BRA_EPI_ISL_1282761_2021-03-06
BRA_EPI_ISL_1285175_2021-03-07
BRA_EPI_ISL_1349231_2021-03-11
BRA_EPI_ISL_1357254_2021-03-20
BRA_EPI_ISL_1570780_2021-03-27
BRA_EPI_ISL_1722261_2021-04-11
BRA_EPI_ISL_1849332_2021-04-24
BRA_EPI_ISL_1982491_2021-03-21
BRA_EPI_ISL_1989516_2021-02-03
BRA_EPI_ISL_2116078_2021-05-01
BRA_EPI_ISL_2316620_2021-05-18
BRA_EPI_ISL_2316644_2021-05-16
BRA_EPI_ISL_2316625_2021-05-18
BRA_EPI_ISL_1151940_2021-02-01
BRA_EPI_ISL_1285748_2021-03-02
BRA_EPI_ISL_1151933_2021-02-05
WP_slawienski_M_51-70_ZGS_1.19.21_2021-01-20
WP_Koszalin_F_51-70_ZGS_1.88.22_2021-01-21
WP_stargardzki_F_31-50_EPI_ISL_1007958_2021-02-03
WP_stargardzki_M_31-50_EPI_ISL_1341025_2021-02-09
WP_lobezki_F_51-70_EPI_ISL_1341026_2021-02-14
WP_NA_M_51-70_KCZ_2.3.4.b_324_2021-02-15
WP_NA_F_a70_KCZ_2.3.4.b_230_2021-02-17
WP_Szczecin_F_18-30_EPI_ISL_1239621_2021-02-18
WP_Szczecin_F_18-30_EPI_ISL_1239623_2021-02-18
WP_Szczecin_M_a70_EPI_ISL_1239622_2021-02-18
WP_Szczecin_M_31-50_EPI_ISL_1239619_2021-02-19
WP_policki_F_31-50_EPI_ISL_1341027_2021-02-19
WP_Szczecin_F_31-50_EPI_ISL_1239620_2021-02-19
WP_NA_M_51-70_KCZ_2.3.4.b_237_2021-02-20
WP_NA_M_u18_EPI_ISL_1378864_2021-02-22
WP_NA_F_a70_KCZ_2.3.4.b_293_2021-02-22
WP_NA_F_u18_EPI_ISL_1378866_2021-02-23
WP_Szczecin_F_18-30_EPI_ISL_1393766_2021-02-23
WP_Szczecin_M_31-50_EPI_ISL_1393771_2021-02-23
WP_Szczecin_M_u18_EPI_ISL_1393776_2021-02-24
WP_Szczecin_F_u18_EPI_ISL_1393774_2021-02-24
WP_gryfinski_M_31-50_EPI_ISL_1181175_2021-02-24
WP_Szczecin_F_51-70_EPI_ISL_1393775_2021-02-24
WP_Szczecin_F_51-70_EPI_ISL_1393773_2021-02-24
WP_NA_F_u18_EPI_ISL_1378867_2021-02-25
WP_NA_M_51-70_KCZ_2.3.4.b_187_2021-02-25
WP_NA_M_51-70_KCZ_2.3.4.b_211_2021-02-25
WP_NA_M_51-70_KCZ_2.3.4.b_250_2021-02-26
WP_NA_F_51-70_KCZ_2.3.4.b_251_2021-02-27
WP_NA_F_51-70_KCZ_2.3.4.b_257_2021-02-28
WP_NA_F_a70_KCZ_2.3.4.b_225_2021-02-28
WP_Szczecin_F_18-30_EPI_ISL_1394178_2021-03-01
WP_Szczecin_F_31-50_EPI_ISL_1394179_2021-03-01
WP_Szczecin_F_31-50_EPI_ISL_1394180_2021-03-01
WP_Szczecin_M_51-70_EPI_ISL_1394177_2021-03-01
WP_NA_M_51-70_KCZ_2.3.4.b_299_2021-03-01
WP_goleniowski_F_u18_EPI_ISL_1500113_2021-03-02
WP_Szczecin_F_18-30_EPI_ISL_1394181_2021-03-02
WP_gryfinski_F_18-30_EPI_ISL_1250943_2021-03-02
WP_Szczecin_F_31-50_EPI_ISL_1394202_2021-03-02
WP_Szczecin_M_51-70_EPI_ISL_1394184_2021-03-02
WP_NA_M_51-70_KCZ_2.3.4.b_228_2021-03-02
WP_Szczecin_F_a70_EPI_ISL_1394183_2021-03-02
WP_Szczecin_M_u18_EPI_ISL_1500111_2021-03-03
WP_Szczecin_M_u18_EPI_ISL_1500109_2021-03-03
WP_Szczecin_F_31-50_EPI_ISL_1394186_2021-03-03
WP_Szczecin_M_18-30_EPI_ISL_1394192_2021-03-04
WP_Szczecin_M_51-70_EPI_ISL_1394195_2021-03-04
WP_Szczecin_F_a70_EPI_ISL_1394193_2021-03-04
WP_Szczecin_F_a70_EPI_ISL_1394196_2021-03-04
WP_Szczecin_F_u18_EPI_ISL_1394198_2021-03-05
WP_NA_M_51-70_KCZ_2.3.4.b_280_2021-03-05
WP_NA_M_31-50_KCZ_2.3.4.b_287_2021-03-07
WP_NA_F_a70_KCZ_2.3.4.b_302_2021-03-07
WP_Szczecin_F_u18_EPI_ISL_1502684_2021-03-08
WP_szczeciniecki_F_18-30_EPI_ISL_1502688_2021-03-08
WP_Szczecin_F_51-70_EPI_ISL_1538626_2021-03-08
WP_Szczecin_F_51-70_EPI_ISL_1538855_2021-03-08
WP_Szczecin_F_a70_EPI_ISL_1538966_2021-03-08
WP_NA_M_a70_KCZ_2.3.4.b_231_2021-03-08
WP_Szczecin_M_u18_EPI_ISL_1538629_2021-03-09
WP_Szczecin_F_31-50_EPI_ISL_1538627_2021-03-09
WP_Szczecin_F_31-50_EPI_ISL_1538858_2021-03-09
WP_Szczecin_F_51-70_EPI_ISL_1538628_2021-03-09
WP_NA_F_51-70_KCZ_2.3.4.b_326_2021-03-09
WP_Szczecin_M_a70_EPI_ISL_1538967_2021-03-09
WP_Szczecin_M_a70_EPI_ISL_1538524_2021-03-09
WP_stargardzki_M_u18_EPI_ISL_1502686_2021-03-10
WP_Szczecin_M_u18_EPI_ISL_1538528_2021-03-10
WP_Szczecin_M_u18_EPI_ISL_1502683_2021-03-10
WP_Szczecin_F_31-50_EPI_ISL_1538969_2021-03-10
WP_policki_F_31-50_EPI_ISL_1341020_2021-03-10
WP_stargardzki_F_31-50_EPI_ISL_1341017_2021-03-10
WP_choszczenski_M_31-50_EPI_ISL_1341010_2021-03-10
WP_Szczecin_M_51-70_EPI_ISL_1538970_2021-03-10
WP_Szczecin_F_51-70_EPI_ISL_1538631_2021-03-10
WP_Szczecin_F_51-70_EPI_ISL_1538968_2021-03-10
WP_choszczenski_M_51-70_EPI_ISL_1341023_2021-03-10
WP_NA_F_51-70_KCZ_2.3.4.b_310_2021-03-10
WP_Szczecin_F_a70_EPI_ISL_1538630_2021-03-10
WP_Szczecin_F_u18_EPI_ISL_1538638_2021-03-11
WP_drawski_M_u18_EPI_ISL_1502690_2021-03-11
WP_stargardzki_M_u18_EPI_ISL_1502685_2021-03-11
WP_Szczecin_M_18-30_EPI_ISL_1538637_2021-03-11
WP_Szczecin_F_18-30_EPI_ISL_1538632_2021-03-11
WP_Szczecin_F_a70_EPI_ISL_1538633_2021-03-11
WP_Szczecin_M_18-30_EPI_ISL_1538634_2021-03-12
WP_Szczecin_F_18-30_EPI_ISL_1538506_2021-03-12
WP_Szczecin_F_51-70_EPI_ISL_1538635_2021-03-12
WP_NA_M_31-50_KCZ_2.3.4.b_318_2021-03-14
WP_Szczecin_M_u18_EPI_ISL_1539063_2021-03-15
WP_Szczecin_F_18-30_EPI_ISL_1538821_2021-03-15
WP_Szczecin_F_18-30_EPI_ISL_1539062_2021-03-15
WP_Szczecin_F_18-30_EPI_ISL_1538808_2021-03-15
WP_Szczecin_M_31-50_EPI_ISL_1538822_2021-03-15
WP_NA_F_a70_KCZ_2.3.4.b_313_2021-03-15
WP_Szczecin_M_u18_EPI_ISL_1538823_2021-03-16
WP_szczeciniecki_M_u18_EPI_ISL_1589075_2021-03-16
WP_kolobrzeski_M_u18_EPI_ISL_1589074_2021-03-16
WP_szczeciniecki_F_18-30_EPI_ISL_1589076_2021-03-16
WP_Szczecin_M_18-30_EPI_ISL_1589080_2021-03-16
WP_Szczecin_F_51-70_EPI_ISL_1538874_2021-03-16
WP_Szczecin_F_a70_EPI_ISL_1539060_2021-03-16
WP_Szczecin_F_18-30_EPI_ISL_1589078_2021-03-17
WP_Szczecin_F_31-50_EPI_ISL_1538810_2021-03-17
WP_NA_M_31-50_KCZ_2.3.4.b_304_2021-03-17
WP_Szczecin_F_a70_EPI_ISL_1538811_2021-03-17
WP_NA_M_a70_KCZ_2.3.4.b_296_2021-03-17
WP_Szczecin_M_u18_EPI_ISL_1538812_2021-03-18
WP_Szczecin_F_31-50_EPI_ISL_1538813_2021-03-18
WP_Szczecin_M_31-50_EPI_ISL_1538817_2021-03-18
WP_Szczecin_M_51-70_EPI_ISL_1538815_2021-03-18
WP_Szczecin_F_51-70_EPI_ISL_1539171_2021-03-18
WP_Szczecin_F_a70_EPI_ISL_1538814_2021-03-18
WP_choszczenski_M_31-50_EPI_ISL_1499139_2021-03-19
WP_gryfinski_F_31-50_EPI_ISL_1499317_2021-03-19
WP_gryfinski_M_31-50_EPI_ISL_1499141_2021-03-19
WP_gryfinski_M_51-70_EPI_ISL_1499319_2021-03-19
WP_Szczecin_F_51-70_EPI_ISL_1538818_2021-03-19
WP_choszczenski_F_51-70_EPI_ISL_1499142_2021-03-19
WP_choszczenski_M_51-70_EPI_ISL_1499318_2021-03-19
WP_Szczecin_F_a70_EPI_ISL_1538819_2021-03-19
WP_Szczecin_F_a70_EPI_ISL_1539061_2021-03-19
WP_Swinoujscie_F_u18_EPI_ISL_1499121_2021-03-20
WP_kamienski_M_18-30_EPI_ISL_1499313_2021-03-20
WP_biaogardzki_M_31-50_EPI_ISL_1499314_2021-03-20
WP_gryfinski_F_31-50_EPI_ISL_1499311_2021-03-20
WP_kamienski_F_31-50_EPI_ISL_1499128_2021-03-20
WP_Szczecin_M_31-50_EPI_ISL_1499125_2021-03-20
WP_kamienski_F_31-50_EPI_ISL_1499131_2021-03-20
WP_kamienski_M_31-50_EPI_ISL_1499120_2021-03-20
WP_gryfinski_M_31-50_EPI_ISL_1499124_2021-03-20
WP_NA_M_51-70_EPI_ISL_1499119_2021-03-20
WP_biaogardzki_F_u18_EPI_ISL_1499118_2021-03-21
WP_Koszalin_M_18-30_EPI_ISL_1499310_2021-03-21
WP_pyrzycki_M_18-30_EPI_ISL_1499134_2021-03-21
WP_pyrzycki_M_31-50_EPI_ISL_1499116_2021-03-21
WP_policki_M_31-50_EPI_ISL_1499135_2021-03-21
WP_Koszalin_F_51-70_EPI_ISL_1499117_2021-03-21
WP_koszaliski_F_51-70_EPI_ISL_1499309_2021-03-21
WP_pyrzycki_F_51-70_EPI_ISL_1499132_2021-03-21
WP_pyrzycki_M_a70_EPI_ISL_1499133_2021-03-21
WP_Szczecin_M_u18_EPI_ISL_1627783_2021-03-22
WP_Szczecin_F_u18_EPI_ISL_1627782_2021-03-22
WP_Szczecin_M_u18_EPI_ISL_1627784_2021-03-22
WP_Szczecin_F_18-30_EPI_ISL_1627781_2021-03-22
WP_Szczecin_F_18-30_EPI_ISL_1627786_2021-03-22
WP_gryfinski_F_31-50_EPI_ISL_1499315_2021-03-22
WP_gryfinski_M_31-50_EPI_ISL_1499137_2021-03-22
WP_Szczecin_F_31-50_EPI_ISL_1627615_2021-03-22
WP_gryfinski_F_31-50_EPI_ISL_1499138_2021-03-22
WP_Szczecin_F_51-70_EPI_ISL_1627947_2021-03-22
WP_gryfinski_F_a70_EPI_ISL_1499316_2021-03-22
WP_Szczecin_M_u18_EPI_ISL_1627785_2021-03-23
WP_Szczecin_F_51-70_EPI_ISL_1627790_2021-03-23
WP_Szczecin_F_51-70_EPI_ISL_1627788_2021-03-23
WP_Szczecin_M_51-70_EPI_ISL_1627791_2021-03-23
WP_Szczecin_M_51-70_EPI_ISL_1627787_2021-03-23
WP_Szczecin_F_a70_EPI_ISL_1627603_2021-03-23
WP_Szczecin_M_u18_EPI_ISL_1627600_2021-03-24
WP_Szczecin_F_18-30_EPI_ISL_1627604_2021-03-24
[truncated: 4,867 more rows]

## Sheet: Epi numbers for non-Alpha
Afghanistan_EPI_ISL_1001001_B.1|20A|_2020-05-30
Afghanistan_EPI_ISL_1034755_B.1.36|20A|_2021-01-21
Albania_EPI_ISL_815257_B.1.236|20A|_2020-09-05
Algeria_EPI_ISL_766865_B.1.1|20B|_2020-06-19
Andorra_EPI_ISL_539496_B.1|20A|_2020-03-13
Angola_EPI_ISL_1347928_B.1.351|Beta|_2021-02-08
Angola_EPI_ISL_1347932_B.1.177.52|20E.EU1|_2021-02-08
Argentina_EPI_ISL_856756_L.3|20B|_2020-12-21
Argentina_EPI_ISL_2136065_P.1|Gamma|_2021-03-25
Argentina_EPI_ISL_2136066_P.1|Gamma|_2021-03-25
Argentina_EPI_ISL_2136094_P.1|Gamma|_2021-03-29
Argentina_EPI_ISL_2158752_C.37|20D|_2021-05-05
Argentina_EPI_ISL_2158817_P.1|Gamma|_2021-05-06
Argentina_EPI_ISL_2158839_C.37|20D|_2021-05-04
Argentina_EPI_ISL_430796_B.1|20A|_2020-03-27
Argentina_EPI_ISL_792335_N.5|20B|_2020-04-25
Argentina_EPI_ISL_1395784_P.2|20B|_2021-02-12
Argentina_EPI_ISL_1395787_C.37|20D|_2021-02-19
Argentina_EPI_ISL_1395788_P.2|20B|_2021-02-19
Argentina_EPI_ISL_1395800_P.2|20B|_2021-02-19
Argentina_EPI_ISL_1395801_P.2|20B|_2021-02-20
Argentina_EPI_ISL_1395804_P.2|20B|_2021-02-17
Argentina_EPI_ISL_1395807_P.2|20B|_2021-02-19
Argentina_EPI_ISL_2007481_P.1|Gamma|_2021-03-19
Argentina_EPI_ISL_2007482_P.1|Gamma|_2021-03-19
Argentina_EPI_ISL_2007472_P.1|Gamma|_2021-03-24
Argentina_EPI_ISL_2007477_P.1|Gamma|_2021-03-25
Argentina_EPI_ISL_1395875_N.5|20B|_2020-08-12
Argentina_EPI_ISL_1395858_N.5|20B|_2020-08-13
Armenia_EPI_ISL_1139150_B.1.1.163|20B|_2021-01-19
Armenia_EPI_ISL_1718299_B.1|20B|_2021-03-18
Aruba_EPI_ISL_547449_B.40|19A|_2020-03-22
Aruba_EPI_ISL_1232748_B.1.177.81|20E.EU1|_2021-02-25
Aruba_EPI_ISL_1232757_B.1.177.81|20E.EU1|_2021-02-25
Aruba_EPI_ISL_1371091_B.1.1.1|20D|_2021-03-10
Aruba_EPI_ISL_1704949_B.1.351|Beta|_2021-04-06
Aruba_EPI_ISL_1962943_C.37|20D|_2021-04-24
Aruba_EPI_ISL_2094359_B.1.621|20A|_2021-04-21
Australia_EPI_ISL_1904454_B.1.617.2|Delta|_2021-04-21
Australia_EPI_ISL_1904470_B.1.617.2|Delta|_2021-04-27
Australia_EPI_ISL_2405117_B.1.617.2|Delta|_2021-05-07
Australia_EPI_ISL_407896_A|19B|_2020-01-30
Australia_EPI_ISL_1300531_B.1.177|20E.EU1|_2020-12-03
Australia_EPI_ISL_968213_B.1.351|Beta|_2021-02-10
Australia_EPI_ISL_1061310_B.1.1.317|20B|_2021-02-20
Australia_EPI_ISL_2405356_B.1.617.2|Delta|_2021-06-01
Australia_EPI_ISL_480662_B.1.1.136|20B|_2020-06-03
Australia_EPI_ISL_522200_B.1.1.136|20B|_2020-06-27
Austria_EPI_ISL_437924_B.1|20C|_2020-03-07
Austria_EPI_ISL_475830_B.1|20A|_2020-03-08
Austria_EPI_ISL_583676_B.1.224|20A|_2020-05-14
Austria_EPI_ISL_583710_B.1.1|20B|_2020-05-04
Austria_EPI_ISL_583733_B.1.1.271|20B|_2020-04-28
Austria_EPI_ISL_583739_B.1.1.271|20B|_2020-05-06
Austria_EPI_ISL_583822_B.1.1|20B|_2020-04-01
Austria_EPI_ISL_583883_B.1.146|20A|_2020-06-30
Austria_EPI_ISL_583886_B.1.1.70|20B|_2020-07-19
Austria_EPI_ISL_853889_C.35|20D|_2020-07-17
Austria_EPI_ISL_853893_B.1.1.70|20B|_2020-07-25
Austria_EPI_ISL_853995_B.1.160|20A|_2020-11-02
Austria_EPI_ISL_1008050_B.1.177.43|20E.EU1|_2021-01-01
Austria_EPI_ISL_1117876_B.1.258.17|20A|_2021-02-05
Austria_EPI_ISL_1495174_B.1.1.428|20B|_2021-02-04
Austria_EPI_ISL_1118047_R.1|20B|_2021-02-06
Austria_EPI_ISL_1180834_B.1.160.28|20A|_2021-02-09
Austria_EPI_ISL_1209279_B.1.258|20A|_2021-02-19
Austria_EPI_ISL_1583297_B.1.177.56|20E.EU1|_2021-02-26
Austria_EPI_ISL_2324249_B.1.221|20A|_2021-02-28
Austria_EPI_ISL_1495514_B.1|20E.EU1|_2021-03-04
Austria_EPI_ISL_2137046_B.1.258.17|20A|_2021-03-06
Austria_EPI_ISL_1495701_B.1.160|20A|_2021-03-16
Austria_EPI_ISL_1495817_B.1.1.70|20B|_2020-08-31
Austria_EPI_ISL_1495929_B.1.351|Beta|_2021-02-27
Austria_EPI_ISL_1671133_B.1.177|20E.EU1|_2020-10-20
Austria_EPI_ISL_1965715_B.1.258|20A|_2021-04-13
Austria_EPI_ISL_2427172_P.1|Gamma|_2021-05-13
Austria_EPI_ISL_2427220_C.36.3|20D|_2021-05-14
Austria_EPI_ISL_2427225_C.36.3|20D|_2021-05-16
Austria_EPI_ISL_437200_B.1.465|20A|_2020-03-31
Azerbaijan_EPI_ISL_2161167_B.1.1.10|20B|_2021-03-01
Bahamas_EPI_ISL_1415412_B.1.1.192|20B|_2020-07-28
Bahamas_EPI_ISL_1415392_B.1.1|20B|_2020-08-24
Bahrain_EPI_ISL_632285_B.1.1.306|20B|_2020-05-31
Bahrain_EPI_ISL_510528_B.4.7|19A|_2020-06-23
Bahrain_EPI_ISL_681309_AE.2|20B|_2020-09-10
Bahrain_EPI_ISL_1660438_B.1.351.3|Beta|_2021-04-04
Bahrain_EPI_ISL_1660422_B.1.351.3|Beta|_2021-04-05
Bahrain_EPI_ISL_1660444_B.1.351.3|Beta|_2021-04-06
Bangladesh_EPI_ISL_1673289_B.1.351.3|Beta|_2021-02-19
Bangladesh_EPI_ISL_2037865_B.1.351.3|Beta|_2021-03-11
Bangladesh_EPI_ISL_1714803_B.1|Beta|_2020-11-04
Bangladesh_EPI_ISL_943561_B.1.351.3|Beta|_2021-01-24
Bangladesh_EPI_ISL_1509637_B.1.351.3|Beta|_2021-03-16
Bangladesh_EPI_ISL_1542073_B.1.466.1|20A|_2020-12-31
Bangladesh_EPI_ISL_1805696_B.1.524|Beta|_2021-02-02
Bangladesh_EPI_ISL_1360428_B.1.351.3|Beta|_2021-02-27
Bangladesh_EPI_ISL_1360447_B.1.351.3|Beta|_2021-02-28
Bangladesh_EPI_ISL_1634452_B.1.351.3|Beta|_2021-03-29
Bangladesh_EPI_ISL_1634455_B.1.351.3|Beta|_2021-03-18
Bangladesh_EPI_ISL_1752689_B.1.351.3|Beta|_2021-02-16
Bangladesh_EPI_ISL_2178951_B.1.351.3|Beta|_2021-02-17
Bangladesh_EPI_ISL_2446027_B.1.351.3|Beta|_2021-05-20
Bangladesh_EPI_ISL_2446028_B.1.351.3|Beta|_2021-05-12
Bangladesh_EPI_ISL_2446033_B.1.525|Eta|_2021-03-31
Bangladesh_EPI_ISL_605908_B.1.1.175|20B|_2020-04-29
Bangladesh_EPI_ISL_1669907_B.1.351.3|Beta|_2021-04-15
Bangladesh_EPI_ISL_2304470_B.1.351.3|Beta|_2021-05-10
Bangladesh_EPI_ISL_2304469_B.1.351.3|Beta|_2021-05-10
Bangladesh_EPI_ISL_1626519_B.1.1.25|20B|_2020-09-10
China_EPI_ISL_452336_B.4|19A|_2020-03-20
Belarus_EPI_ISL_860804_B.1.164|20A|_2020-11-30
Belarus_EPI_ISL_860811_B.1.164|20A|_2020-11-04
Belarus_EPI_ISL_860801_B.1.36|20A|_2020-10-26
Belarus_EPI_ISL_1222766_B.1|20A|_2021-02-26
Belarus_EPI_ISL_933533_B.1|20A|_2020-12-08
Belarus_EPI_ISL_754229_B.1.164|20A|_2020-04-24
Belarus_EPI_ISL_754230_B.1.164|20A|_2020-07-06
Belarus_EPI_ISL_754231_B.1|20A|_2020-07-28
Belarus_EPI_ISL_2032231_B.1.525|Eta|_2021-03-22
Belarus_EPI_ISL_1653933_C.36.3|20D|_2021-03-25
Belgium_EPI_ISL_415159_B.1|20C|_2020-02-29
Belgium_EPI_ISL_1620795_B.1.160.26|20A|_2021-03-28
Belgium_EPI_ISL_1752509_B.1|20A|_2020-05-10
Belgium_EPI_ISL_420443_B.1|20A|_2020-03-04
Belgium_EPI_ISL_734712_B.1|20A|_2020-05-08
Belgium_EPI_ISL_477006_B.1|20C|_2020-05-11
Belgium_EPI_ISL_734794_B.1.1.221|20B|_2020-07-07
Belgium_EPI_ISL_735107_B.1.1|20B|_2020-10-18
Belgium_EPI_ISL_735113_B.1.177.77|20E.EU1|_2020-10-18
Belgium_EPI_ISL_890241_B.1.177|20E.EU1|_2020-12-20
Belgium_EPI_ISL_1049200_B.1.221|20A|_2021-01-22
Belgium_EPI_ISL_1312259_B.1.214.2|20A|_2021-02-24
Belgium_EPI_ISL_1380955_B.1.160|20A|_2021-02-11
Belgium_EPI_ISL_2425216_P.1|Gamma|_2021-04-07
Belgium_EPI_ISL_2425341_B.1.177.77|20E.EU1|_2021-02-01
Belgium_EPI_ISL_475073_B.1.1.75|20B|_2020-03-20
Belgium_EPI_ISL_634886_B.1.221|20A|_2020-10-04
Belgium_EPI_ISL_1334487_B.1.214.2|20A|_2021-02-25
Belgium_EPI_ISL_1827148_B.1.351|Beta|_2021-04-06
Belgium_EPI_ISL_2192019_P.1|Gamma|_2021-04-20
Belgium_EPI_ISL_2192067_P.1|Gamma|_2021-04-20
Belgium_EPI_ISL_2192420_B.1.617.2|Delta|_2021-05-01
Belgium_EPI_ISL_498628_B.1.1.232|20B|_2020-06-18
Belgium_EPI_ISL_540444_B.1.1.1|20D|_2020-07-09
Belgium_EPI_ISL_540478_B.1.221|20A|_2020-07-27
Belgium_EPI_ISL_540487_B.1.1.198|20B|_2020-07-27
Belgium_EPI_ISL_636618_B.1.221|20A|_2020-10-27
Belgium_EPI_ISL_1058558_B.1.160|20A|_2021-02-03
Belgium_EPI_ISL_1058636_B.1.160|20A|_2021-02-04
Belgium_EPI_ISL_1165827_B.1.351|Beta|_2021-02-19
Belgium_EPI_ISL_1171553_B.1.177|20E.EU1|_2021-02-24
Belgium_EPI_ISL_2245252_P.1|Gamma|_2021-05-07
Belgium_EPI_ISL_2348590_B.1.617.2|Delta|_2021-05-20
Belgium_EPI_ISL_1524947_P.1|Gamma|_2021-03-24
Belgium_EPI_ISL_1298449_B.1.1.522|20B|_2021-02-27
Belgium_EPI_ISL_2362657_P.1|Gamma|_2021-05-20
Belize_EPI_ISL_1822739_B.1.147|20A|_2020-08-12
Belize_EPI_ISL_1822766_B.1.147|20A|_2020-10-05
Belize_EPI_ISL_509711_B.1.1|20B|_2020-03-20
Bolivia_EPI_ISL_2274031_P.1|Gamma|_2021-03-24
Bolivia_EPI_ISL_2274033_B.1.575|20C|_2021-03-26
Bolivia_EPI_ISL_2274036_B.1.1.348|20B|_2021-03-27
Bolivia_EPI_ISL_2274037_P.1|Gamma|_2021-03-25
Bolivia_EPI_ISL_2274038_P.1|Gamma|_2021-03-19
Bolivia_EPI_ISL_2274040_B.1.1.274|20B|_2021-03-28
Bolivia_EPI_ISL_837554_B.1.1|20B|_2020-08-03
Bolivia_EPI_ISL_837559_B.1.1|20B|_2020-08-11
Bolivia_EPI_ISL_837566_B.1.1|20B|_2020-05-08
Bolivia_EPI_ISL_837567_B.1.1|20B|_2020-05-16
Bolivia_EPI_ISL_1278281_B.1.1.348|20B|_2021-02-05
Bolivia_EPI_ISL_1278282_B.1.1.274|20B|_2021-02-05
Bolivia_EPI_ISL_1278283_B.1.1.274|20B|_2021-02-05
Bolivia_EPI_ISL_1278284_B.1.1|20B|_2021-02-05
Bolivia_EPI_ISL_1278277_B.1.1|20B|_2021-02-18
Bonaire_EPI_ISL_1232632_B.1.575|20C|_2021-02-24
Bonaire_EPI_ISL_1232640_B.1.575|20C|_2021-02-24
Bosnia_and_Herzegovina_EPI_ISL_462753_B.1.1|20B|_2020-05-27
Bosnia_and_Herzegovina_EPI_ISL_722201_B.1.258|20A|_2020-11-20
Bosnia_and_Herzegovina_EPI_ISL_1731081_B.1|20A|_2021-02-08
Bosnia_and_Herzegovina_EPI_ISL_722209_C.35|20D|_2020-11-20
Bosnia_and_Herzegovina_EPI_ISL_910329_B.1.146|20A|_2021-01-11
Bosnia_and_Herzegovina_EPI_ISL_462464_B.1.1.438|20B|_2020-03-25
Bosnia_and_Herzegovina_EPI_ISL_462472_B.1|20A|_2020-04-01
Bosnia_and_Herzegovina_EPI_ISL_462461_B.1|20A|_2020-04-11
Bosnia_and_Herzegovina_EPI_ISL_462470_B.1.22|20A|_2020-04-22
Bosnia_and_Herzegovina_EPI_ISL_1300659_B.1.258|20A|_2021-02-24
Bosnia_and_Herzegovina_EPI_ISL_1300645_B.1.258|20A|_2021-02-24
Bosnia_and_Herzegovina_EPI_ISL_1300658_B.1.160|20A|_2021-02-25
Bosnia_and_Herzegovina_EPI_ISL_1300650_B.1.258.17|20A|_2021-03-03
Bosnia_and_Herzegovina_EPI_ISL_955142_B.1.1.70|20B|_2020-07-15
Bosnia_and_Herzegovina_EPI_ISL_955144_B.1.1|20B|_2020-08-20
Bosnia_and_Herzegovina_EPI_ISL_955146_B.1.1|20B|_2020-09-02
Bosnia_and_Herzegovina_EPI_ISL_955148_B.1.1.39|20B|_2020-09-14
Bosnia_and_Herzegovina_EPI_ISL_955151_B.1.1.70|20B|_2020-10-28
Bosnia_and_Herzegovina_EPI_ISL_955188_B.1.36.1|20A|_2021-01-21
Bosnia_and_Herzegovina_EPI_ISL_1016884_B.1.258.17|20A|_2021-02-04
Bosnia_and_Herzegovina_EPI_ISL_1016885_B.1.160|20A|_2021-02-05
Bosnia_and_Herzegovina_EPI_ISL_1016970_B.1.258|20A|_2021-02-11
Botswana_EPI_ISL_1677737_B.1.351|Beta|_2021-02-04
Botswana_EPI_ISL_1677732_B.1.351|Beta|_2021-02-14
Botswana_EPI_ISL_2153476_B.1.617.2|Delta|_2021-05-10
Botswana_EPI_ISL_1516862_B.1.351|Beta|_2021-03-18
Brazil_EPI_ISL_2274070_P.1|Gamma|_2021-04-19
Brazil_EPI_ISL_415128_B.40|19A|_2020-02-29
Brazil_EPI_ISL_2293011_P.1|Gamma|_2021-02-17
Brazil_EPI_ISL_1181471_B.1.1.33|20B|_2020-08-19
Brazil_EPI_ISL_792599_B.1.1|20B|_2020-10-19
Brazil_EPI_ISL_500481_B.1.1|20B|_2020-04-08
Brazil_EPI_ISL_1469672_B.1.1.33|20B|_2020-06-24
Brazil_EPI_ISL_2443551_P.1|Gamma|_2021-04-05
Brazil_EPI_ISL_1821204_P.1|Gamma|_2021-03-09
Brazil_EPI_ISL_1966774_P.4|Gamma|_2021-04-12
Brazil_EPI_ISL_2445540_P.1|Gamma|_2021-05-13
Brazil_EPI_ISL_476267_B.1.1.28|20B|_2020-03-30
Bulgaria_EPI_ISL_480301_B.1.1|20B|_2020-04-29
Bulgaria_EPI_ISL_1233515_B.1.160|20A|_2020-12-10
Bulgaria_EPI_ISL_1233533_B.1.258|20A|_2020-12-23
Bulgaria_EPI_ISL_1233577_B.1.177.86|20E.EU1|_2021-02-03
Bulgaria_EPI_ISL_1302145_B.1.160|20A|_2020-12-29
Bulgaria_EPI_ISL_2081878_B.1.1.187|20B|_2020-07-08
Bulgaria_EPI_ISL_2081895_B.1|20A|_2020-11-10
Bulgaria_EPI_ISL_2081901_B.1.36.1|20A|_2020-10-20
Bulgaria_EPI_ISL_2081906_B.1.1|20B|_2020-09-21
Bulgaria_EPI_ISL_2081908_B.1|20A|_2020-10-27
Bulgaria_EPI_ISL_2081914_B.1.1.301|20B|_2020-10-02
Bulgaria_EPI_ISL_2081936_B.1|20A|_2020-10-28
Bulgaria_EPI_ISL_480305_B.1.1|20B|_2020-05-17
Bulgaria_EPI_ISL_480307_B.1|20A|_2020-03-30
Bulgaria_EPI_ISL_480308_B.1.1.218|20B|_2020-05-11
Burkina_Faso_EPI_ISL_660478_A.19|19B|_2020-07-23
Burkina_Faso_EPI_ISL_2227198_A.27|19B|_2021-02-03
Burkina_Faso_EPI_ISL_2227199_A.27|19B|_2021-02-01
Burkina_Faso_EPI_ISL_660526_A.21|19B|_2020-08-27
Burkina_Faso_EPI_ISL_660451_A|19B|_2020-05-10
Burkina_Faso_EPI_ISL_660469_B.1|20A|_2020-08-14
Burkina_Faso_EPI_ISL_660473_A.21|19B|_2020-11-03
Burkina_Faso_EPI_ISL_2289123_A.27|19B|_2021-02-03
Burkina_Faso_EPI_ISL_2227203_A.27|19B|_2021-01-11
Burkina_Faso_EPI_ISL_660442_B.1|20A|_2020-10-14
Cambodia_EPI_ISL_682298_A.6|19B|_2020-03-21
Cameroon_EPI_ISL_1972319_B.1.619|20A|_2021-03-03
Cameroon_EPI_ISL_1972323_B.1.619|20A|_2021-03-01
Cameroon_EPI_ISL_1972310_B.1.619|20A|_2021-03-02
Cameroon_EPI_ISL_1972311_B.1.619|20A|_2021-03-02
Cameroon_EPI_ISL_845554_W.1|20E.EU1|_2020-10-26
Cameroon_EPI_ISL_1190756_B.1.619|20A|_2021-01-30
Cameroon_EPI_ISL_1790118_B.1.351|Beta|_2021-02-08
Canada_EPI_ISL_2170474_B.1.351.3|Beta|_2021-04-10
Canada_EPI_ISL_1272248_B.1.1.176|20B|_2021-02-07
Canada_EPI_ISL_2161788_B.1.351.3|Beta|_2021-04-11
Canada_EPI_ISL_413015_B|19A|_2020-01-23
Canada_EPI_ISL_591267_B|19A|_2020-04-14
Canada_EPI_ISL_1696878_B.1.160|20A|_2021-01-12
Canada_EPI_ISL_2007669_B.1.1.176|20B|_2020-05-10
Canada_EPI_ISL_1379063_B.1.1.176|20B|_2020-06-17
Canada_EPI_ISL_1403299_B.1.1.176|20B|_2020-10-25
Canada_EPI_ISL_1241439_A|19B|_2020-04-09
Canada_EPI_ISL_1379153_B.1.1.176|20B|_2020-10-15
Canada_EPI_ISL_535716_B.4|19A|_2020-02-25
Central_African_Republic_EPI_ISL_2365410_B.1.620|20A|_2021-03-31
Central_African_Republic_EPI_ISL_2365411_B.1.620|20A|_2021-03-31
Central_African_Republic_EPI_ISL_2365415_B.1.620|20A|_2021-04-12
China_EPI_ISL_1260835_B|19A|_2020-04-11
Chile_EPI_ISL_2391327_P.1|Gamma|_2021-05-09
Chile_EPI_ISL_1321477_C.37|20D|_2021-02-16
Chile_EPI_ISL_1300476_C.11|20D|_2020-10-06
Chile_EPI_ISL_681700_C.11|20D|_2020-08-15
Chile_EPI_ISL_2009267_C.36.3|20D|_2021-04-11
Chile_EPI_ISL_1167696_N.4|20B|_2020-04-11
Chile_EPI_ISL_2391364_C.37|20D|_2021-01-26
Chile_EPI_ISL_2391368_C.37|20D|_2021-02-17
Chile_EPI_ISL_1321478_C.37|20D|_2021-02-23
Chile_EPI_ISL_1321480_C.37|20D|_2021-02-25
Chile_EPI_ISL_746791_C.26|20D|_2020-05-22
Chile_EPI_ISL_445351_B.40|19A|_2020-04-02
China_EPI_ISL_1970347_B.1.617.2|Delta|_2021-04-22
China_EPI_ISL_1970348_B.1.617.2|Delta|_2021-04-21
China_EPI_ISL_1970349_B.1.617.2|Delta|_2021-04-21
Colombia_EPI_ISL_1303366_P.1|Gamma|_2021-02-18
Colombia_EPI_ISL_2321586_B.1.621|20A|_2021-03-28
Colombia_EPI_ISL_2339862_B.1.1.348|20B|_2020-07-09
Colombia_EPI_ISL_498170_A.1|19B|_2020-03-11
Colombia_EPI_ISL_2157196_P.1|Gamma|_2021-04-08
Colombia_EPI_ISL_941995_B.1.1|20B|_2020-06-23
Colombia_EPI_ISL_1582980_B.1.621|20A|_2021-02-21
Colombia_EPI_ISL_1820926_B.1.621|20A|_2021-02-26
Colombia_EPI_ISL_1220045_B.1.621|20A|_2021-01-11
Colombia_EPI_ISL_956306_B.1.1|20B|_2020-10-05
Colombia_EPI_ISL_1324144_B.1.1|20B|_2020-11-30
Colombia_EPI_ISL_1582987_B.1.621|20A|_2021-03-24
Republic_of_the_Congo_EPI_ISL_1854758_B.1.214.2|20A|_2021-02-12
Republic_of_the_Congo_EPI_ISL_1854762_B.1.214.2|20A|_2021-02-03
Republic_of_the_Congo_EPI_ISL_1854765_B.1.214.2|20A|_2021-02-08
Republic_of_the_Congo_EPI_ISL_1854768_B.1.214.2|20A|_2021-02-09
Republic_of_the_Congo_EPI_ISL_1854775_B.1.214.2|20A|_2021-02-16
Republic_of_the_Congo_EPI_ISL_1854782_B.1.214.2|20A|_2021-02-20
Republic_of_the_Congo_EPI_ISL_1857282_B.1.214.2|20A|_2021-03-03
Republic_of_the_Congo_EPI_ISL_2087051_B.1.214.2|20A|_2021-03-03
Republic_of_the_Congo_EPI_ISL_2090979_B.1.214.2|20A|_2021-03-05
Republic_of_the_Congo_EPI_ISL_581455_B.1|20A|_2020-06-06
Costa_Rica_EPI_ISL_1517420_B.1.1.328|20B|_2020-12-30
Costa_Rica_EPI_ISL_1527014_A.2.5.2|19B|_2021-02-17
Costa_Rica_EPI_ISL_1527024_A.2.5.2|19B|_2021-02-24
Costa_Rica_EPI_ISL_682265_B.1.1.389|20B|_2020-08-07
Costa_Rica_EPI_ISL_682275_B.1.1.389|20B|_2020-08-17
Costa_Rica_EPI_ISL_770002_B.1.1.516|20B|_2020-10-09
Costa_Rica_EPI_ISL_1067599_A.2.5.1|19B|_2021-01-25
Costa_Rica_EPI_ISL_1067595_A.2.5.1|19B|_2021-02-02
Costa_Rica_EPI_ISL_1067604_B.1.351|Beta|_2021-02-10
Costa_Rica_EPI_ISL_1196431_B.1.351|Beta|_2021-02-11
Costa_Rica_EPI_ISL_1827523_P.1|Gamma|_2021-03-17
Costa_Rica_EPI_ISL_1827526_A.2.5|19B|_2021-03-16
Costa_Rica_EPI_ISL_2103398_P.1|Gamma|_2021-04-04
Costa_Rica_EPI_ISL_2272990_A.2.5.1|19B|_2021-04-21
Ukraine_EPI_ISL_733077_B.1.1|20B|_2020-09-21
Ukraine_EPI_ISL_733078_B.1.1|20B|_2020-09-21
Ukraine_EPI_ISL_733452_B.1.1.349|20B|_2020-10-14
Ukraine_EPI_ISL_428901_B.1|20A|_2020-03-23
Croatia_EPI_ISL_1591325_B.1.258.17|20A|_2021-03-06
Croatia_EPI_ISL_2308901_B.1.258|20A|_2021-03-11
Croatia_EPI_ISL_994659_B.1|20A|_2020-04-15
Croatia_EPI_ISL_1287404_B.1.258|20A|_2021-02-20
Croatia_EPI_ISL_1443545_B.1.258|20A|_2021-02-22
Croatia_EPI_ISL_1109556_B.1.526|Iota|_2021-02-09
Croatia_EPI_ISL_1109544_B.1.258|20A|_2021-02-03
Croatia_EPI_ISL_454574_B.1|20A|_2020-04-09
Croatia_EPI_ISL_710555_B.1.1.70|20B|_2020-08-17
Croatia_EPI_ISL_710548_B.1.1.70|20B|_2020-08-31
Croatia_EPI_ISL_710573_B.1.1.70|20B|_2020-10-04
Croatia_EPI_ISL_710553_B.1.1.433|20B|_2020-09-29
Croatia_EPI_ISL_710556_B.1.1.70|20B|_2020-08-30
Croatia_EPI_ISL_710560_B.1.1.70|20B|_2020-09-08
Curacao_EPI_ISL_1678824_B.1.621|20A|_2021-03-26
Curacao_EPI_ISL_547451_B.27|19A|_2020-03-10
Curacao_EPI_ISL_1232268_B.1.1.372|20B|_2021-02-17
Curacao_EPI_ISL_1014577_B.1.22.1|20A|_2020-11-20
Curacao_EPI_ISL_1014564_B.1.221|20A|_2020-10-31
Curacao_EPI_ISL_2094367_B.1.621|20A|_2021-04-26
Curacao_EPI_ISL_2220456_B.1.623|20A|_2021-04-28
Curacao_EPI_ISL_2405527_B.1.621|20A|_2021-05-15
Cyprus_EPI_ISL_463744_B.1.1.277|20B|_2020-03-23
Cyprus_EPI_ISL_463746_B.1.1|20B|_2020-04-11
Cyprus_EPI_ISL_1164626_B.1.1|20B|_2020-05-05
Cyprus_EPI_ISL_1164627_B.1.1|20B|_2020-05-12
Cyprus_EPI_ISL_1164628_B.1.1|20B|_2020-06-10
Cyprus_EPI_ISL_1164632_B.1.236|20A|_2020-07-22
Cyprus_EPI_ISL_1164633_B.1.236|20A|_2020-07-27
Cyprus_EPI_ISL_1164654_B.1.2|20G|_2020-09-17
Cyprus_EPI_ISL_1164659_B.1.2|20G|_2020-09-23
Cyprus_EPI_ISL_1164667_B.1.258|20A|_2020-10-04
Cyprus_EPI_ISL_1164669_B.1.258|20A|_2020-10-06
Cyprus_EPI_ISL_1164687_B.1.258|20A|_2020-11-04
Cyprus_EPI_ISL_1164690_B.1.258|20A|_2020-11-07
Cyprus_EPI_ISL_1164696_B.1.258|20A|_2020-11-14
Cyprus_EPI_ISL_1164701_B.1.258|20A|_2020-12-28
Cyprus_EPI_ISL_1164704_B.1.258|20A|_2020-12-28
Cyprus_EPI_ISL_1164714_B.1.258|20A|_2020-12-28
Cyprus_EPI_ISL_1164740_B.1.258|20A|_2021-01-25
Czech_Republic_EPI_ISL_1745698_B.1.258|20A|_2021-04-21
Czech_Republic_EPI_ISL_416742_B.1|20A|_2020-02-29
Czech_Republic_EPI_ISL_1299996_B.1.258|20A|_2021-02-14
Czech_Republic_EPI_ISL_895793_B.1.1.161|20B|_2020-06-01
Czech_Republic_EPI_ISL_895772_B.1|20A|_2020-04-15
Czech_Republic_EPI_ISL_889355_B.1.1.277|20B|_2020-08-19
Czech_Republic_EPI_ISL_889362_B.1.527|20A|_2020-07-21
Czech_Republic_EPI_ISL_889390_B.1.1|20B|_2020-04-08
Czech_Republic_EPI_ISL_792702_B.1.258|20A|_2020-12-01
Czech_Republic_EPI_ISL_850668_B.1.221|20A|_2020-12-11
Czech_Republic_EPI_ISL_960418_B.1.258|20A|_2020-12-21
Czech_Republic_EPI_ISL_2324657_B.1.258|20A|_2020-12-29
Czech_Republic_EPI_ISL_960439_B.1.416.1|20A|_2021-01-04
Czech_Republic_EPI_ISL_2439062_B.1.2|20G|_2021-01-10
Czech_Republic_EPI_ISL_1321401_B.1.258|20A|_2021-02-25
Czech_Republic_EPI_ISL_1321422_B.1.258|20A|_2021-02-17
Czech_Republic_EPI_ISL_626582_B.1.416.1|20A|_2020-09-15
Czech_Republic_EPI_ISL_626572_B.1.258|20A|_2020-09-20
Czech_Republic_EPI_ISL_1492266_B.1.258|20A|_2021-02-18
Czech_Republic_EPI_ISL_1492306_B.1.258|20A|_2021-03-01
Czech_Republic_EPI_ISL_584073_B.1|20A|_2020-05-10
Czech_Republic_EPI_ISL_660596_B.1.258|20A|_2020-09-22
Czech_Republic_EPI_ISL_906054_B.1.1|20B|_2020-09-29
Denmark_EPI_ISL_429286_B.1.428|20C|_2020-03-11
Denmark_EPI_ISL_669795_B.1.1.298|20B|_2020-11-02
Denmark_EPI_ISL_614512_B.1.118|20C|_2020-05-11
Denmark_EPI_ISL_682407_B.1.177.86|20E.EU1|_2020-11-16
Denmark_EPI_ISL_618141_B.1.179|20A|_2020-06-15
Denmark_EPI_ISL_618146_C.32|20D|_2020-06-15
Denmark_EPI_ISL_618147_B.1.179|20A|_2020-06-22
Denmark_EPI_ISL_618632_B.1|20C|_2020-04-13
Denmark_EPI_ISL_615636_B.1|20A|_2020-03-23
Denmark_EPI_ISL_618192_B.1.1.261|20B|_2020-07-13
Denmark_EPI_ISL_618357_C.35|20D|_2020-07-13
Denmark_EPI_ISL_757970_B.1.160.17|20A|_2020-12-14
Denmark_EPI_ISL_844517_B.1.1.433|20B|_2020-11-30
Denmark_EPI_ISL_927206_B.1.177.12|20E.EU1|_2021-01-18
Denmark_EPI_ISL_615238_B.1.177.21|20E.EU1|_2020-09-14
Denmark_EPI_ISL_1866739_B.1.258|20A|_2021-02-01
Denmark_EPI_ISL_1869997_B.1.1.433|20B|_2021-02-22
Denmark_EPI_ISL_1872258_B.1.177.46|20E.EU1|_2021-04-19
Denmark_EPI_ISL_614789_B.1.263|20C|_2020-05-04
Denmark_EPI_ISL_416143_B.1|20A|_2020-02-28
Dominican_Republic_EPI_ISL_2274007_B.1.575|20C|_2021-03-15
Dominican_Republic_EPI_ISL_2274010_A.2.5|19B|_2021-03-12
Dominican_Republic_EPI_ISL_2274024_A.2.5|19B|_2021-03-17
Dominican_Republic_EPI_ISL_1378834_A.2.5|19B|_2021-03-11
Democratic_Republic_of_the_Congo_EPI_ISL_471413_A|19B|_2020-04-25
Democratic_Republic_of_the_Congo_EPI_ISL_527508_B.1|20A|_2020-05-25
Democratic_Republic_of_the_Congo_EPI_ISL_2135843_B.1.617.2|Delta|_2021-05-03
Democratic_Republic_of_the_Congo_EPI_ISL_2135845_B.1.617.2|Delta|_2021-05-03
Democratic_Republic_of_the_Congo_EPI_ISL_2135840_A.23.1|19B|_2021-03-04
Democratic_Republic_of_the_Congo_EPI_ISL_2135844_B.1.617.2|Delta|_2021-04-20
Democratic_Republic_of_the_Congo_EPI_ISL_447247_A|19B|_2020-04-25
Democratic_Republic_of_the_Congo_EPI_ISL_961010_A|19B|_2020-03-17
Democratic_Republic_of_the_Congo_EPI_ISL_1623756_A.23.1|19B|_2021-02-19
Democratic_Republic_of_the_Congo_EPI_ISL_1623758_A.23.1|19B|_2021-02-27
Democratic_Republic_of_the_Congo_EPI_ISL_1785567_B.1.351|Beta|_2021-03-23
Ecuador_EPI_ISL_826823_B.1.1|20B|_2020-06-25
Ecuador_EPI_ISL_417482_B.55|19A|_2020-03-09
Ecuador_EPI_ISL_2348787_B.1.1.411|20B|_2021-05-23
Ecuador_EPI_ISL_2348792_C.37|20D|_2021-03-23
Ecuador_EPI_ISL_1443667_B.1.1.411|20B|_2021-03-04
Ecuador_EPI_ISL_1443679_B.1.1.411|20B|_2021-03-20
Ecuador_EPI_ISL_1968980_P.1|Gamma|_2021-04-10
Ecuador_EPI_ISL_2423535_P.1|Gamma|_2021-05-25
Ecuador_EPI_ISL_2361456_P.1|Gamma|_2021-03-31
Ecuador_EPI_ISL_2228104_B.1.1.1|20D|_2021-05-01
Ecuador_EPI_ISL_2361461_P.1|Gamma|_2021-05-02
Ecuador_EPI_ISL_2361476_C.37|20D|_2021-05-18
Ecuador_EPI_ISL_516650_A.1|19B|_2020-07-22
Ecuador_EPI_ISL_728204_A.2.5|19B|_2020-12-01
Egypt_EPI_ISL_1936136_C.36|20D|_2021-05-02
Egypt_EPI_ISL_1936134_C.36|20D|_2021-05-02
Egypt_EPI_ISL_1936127_C.36.3|20D|_2021-05-02
Egypt_EPI_ISL_812800_B.1.1|20B|_2020-05-25
Egypt_EPI_ISL_794593_B.1|20A|_2020-03-13
Egypt_EPI_ISL_1109624_C.36|20D|_2020-07-18
Egypt_EPI_ISL_2227350_C.36.3|20D|_2021-04-18
Egypt_EPI_ISL_2232306_C.36|20D|_2020-10-26
Egypt_EPI_ISL_1936341_C.36|20D|_2021-02-12
Egypt_EPI_ISL_1936342_C.36|20D|_2021-02-12
Egypt_EPI_ISL_1936343_C.36|20D|_2021-02-12
Egypt_EPI_ISL_1936308_C.36|20D|_2021-02-12
UK_EPI_ISL_407071_A|19B|_2020-01-29
UK_EPI_ISL_464172_B.61|19A|_2020-02-14
UK_EPI_ISL_1790461_B.1.617.2|Delta|_2021-04-19
UK_EPI_ISL_2118742_B.1.617.2|Delta|_2021-05-09
UK_EPI_ISL_2347583_B.1.617.2|Delta|_2021-05-20
UK_EPI_ISL_558862_B.1.1.365|20B|_2020-06-14
UK_EPI_ISL_492540_B.1.1|20B|_2020-04-12
UK_EPI_ISL_556809_B.1.1.255|20B|_2020-07-15
UK_EPI_ISL_601663_B.1.1.286|20B|_2020-09-19
UK_EPI_ISL_482094_B.1.1|20B|_2020-05-05
UK_EPI_ISL_2446230_B.1.617.2|Delta|_2021-06-01
UK_EPI_ISL_444127_B.1|20A|_2020-04-08
UK_EPI_ISL_2395556_B.1.617.2|Delta|_2021-05-26
UK_EPI_ISL_2446255_B.1.617.2|Delta|_2021-06-01
UK_EPI_ISL_2446354_B.1.617.2|Delta|_2021-06-01
UK_EPI_ISL_2446191_B.1.617.2|Delta|_2021-06-01
UK_EPI_ISL_2447163_B.1.617.2|Delta|_2021-06-01
UK_EPI_ISL_2447156_B.1.617.2|Delta|_2021-06-01
UK_EPI_ISL_2447072_B.1.617.2|Delta|_2021-06-01
UK_EPI_ISL_2447073_B.1.617.2|Delta|_2021-06-01
UK_EPI_ISL_2447171_B.1.617.2|Delta|_2021-06-01
UK_EPI_ISL_2447095_B.1.617.2|Delta|_2021-06-01
UK_EPI_ISL_557768_B.1.36|20A|_2020-07-06
UK_EPI_ISL_553889_B.1.1.37|20B|_2020-06-12
UK_EPI_ISL_541839_B.1.177|20E.EU1|_2020-08-23
UK_EPI_ISL_567333_B.1|20C|_2020-09-10
UK_EPI_ISL_588513_C.30|20D|_2020-09-24
UK_EPI_ISL_638768_B.1.177.84|20E.EU1|_2020-10-12
UK_EPI_ISL_642141_AD.2|20B|_2020-11-02
Austria_EPI_ISL_1180916_B.1.160|20A|_2021-02-16
Liechtenstein_EPI_ISL_1008286_B.1.1.7|20A|_2021-01-20
Liechtenstein_EPI_ISL_1118083_B.1|20A|_2021-02-03
Liechtenstein_EPI_ISL_1180897_B.1.1|20B|_2021-02-10
Morocco_EPI_ISL_933715_B.1|20A|_2020-09-14
Morocco_EPI_ISL_933719_B.1|20A|_2020-09-14
Equatorial_Guinea_EPI_ISL_648314_B.1|20C|_2020-04-12
Equatorial_Guinea_EPI_ISL_953408_B.1.192|20A|_2020-07-06
Equatorial_Guinea_EPI_ISL_648332_B.1.192|20A|_2020-04-26
Equatorial_Guinea_EPI_ISL_953420_B.1.1|20B|_2020-07-27
Equatorial_Guinea_EPI_ISL_648338_B.1.192|20A|_2020-08-12
Equatorial_Guinea_EPI_ISL_2002669_B.1.192|20A|_2020-11-04
Equatorial_Guinea_EPI_ISL_2002670_B.1.177|20E.EU1|_2020-11-24
Equatorial_Guinea_EPI_ISL_1700675_B.1.351|Beta|_2021-04-01
Equatorial_Guinea_EPI_ISL_1673318_B.1.351|Beta|_2021-01-26
Equatorial_Guinea_EPI_ISL_1673319_B.1.351.2|Beta|_2021-01-28
Equatorial_Guinea_EPI_ISL_2002688_B.1.351|Beta|_2021-03-01
Equatorial_Guinea_EPI_ISL_1700687_B.1.351|Beta|_2021-03-01
Estonia_EPI_ISL_1138556_B.1.177.79|20E.EU1|_2021-02-02
Estonia_EPI_ISL_1259169_B.1.1.397|20B|_2021-02-18
Estonia_EPI_ISL_1190903_B.1.527|20A|_2021-02-10
Estonia_EPI_ISL_1319297_B.1.1.89|20B|_2021-02-16
Estonia_EPI_ISL_1259143_B.1.1.317|20B|_2021-02-16
Estonia_EPI_ISL_1190920_B.1|20B|_2021-02-10
Estonia_EPI_ISL_1259135_B.1.1.317|20B|_2021-02-16
Estonia_EPI_ISL_1470125_B.1.1.397|20B|_2021-02-17
Estonia_EPI_ISL_1470130_B.1.177|20E.EU1|_2021-02-17
Estonia_EPI_ISL_2107178_B.1.466.1|20A|_2021-04-03
Estonia_EPI_ISL_1138514_B.1.221|20A|_2020-12-21
Estonia_EPI_ISL_1470044_B.1.1.10|20B|_2021-02-17
Estonia_EPI_ISL_1470045_B.1.258|20A|_2021-02-17
Estonia_EPI_ISL_1685434_B.1.1.317|20B|_2021-03-17
Estonia_EPI_ISL_1685448_B.1.1.317|20B|_2021-03-17
Estonia_EPI_ISL_2107284_B.1.351|Beta|_2021-04-02
Estonia_EPI_ISL_1685378_B.1.177|20E.EU1|_2021-02-28
Eswatini_EPI_ISL_1196010_B.1.351|Beta|_2020-12-14
Eswatini_EPI_ISL_1827699_B.1.351|Beta|_2021-02-23
Eswatini_EPI_ISL_1827700_B.1.351|Beta|_2021-02-23
Eswatini_EPI_ISL_1827701_B.1.351|Beta|_2021-02-23
Eswatini_EPI_ISL_1827703_B.1.351|Beta|_2021-02-23
Eswatini_EPI_ISL_1827704_B.1.351|Beta|_2021-02-23
Eswatini_EPI_ISL_1827706_B.1.351|Beta|_2021-03-23
Eswatini_EPI_ISL_1827707_B.1.351|Beta|_2021-03-23
Eswatini_EPI_ISL_1827708_B.1.351|Beta|_2021-03-04
Ethiopia_EPI_ISL_1897644_B.1.480|20A|_2021-02-03
Ethiopia_EPI_ISL_2241494_B.1|20A|_2021-02-04
Ethiopia_EPI_ISL_2241622_B.1.480|20A|_2021-02-04
Ethiopia_EPI_ISL_2241623_B.1|20A|_2021-05-01
Finland_EPI_ISL_407079_B|19A|_2020-01-29
Finland_EPI_ISL_732570_AH.3|20B|_2020-12-02
Finland_EPI_ISL_1497255_B.1.36|20A|_2021-02-07
Finland_EPI_ISL_732578_AH.3|20B|_2020-12-02
Finland_EPI_ISL_756182_B.1.1|20B|_2020-09-15
Finland_EPI_ISL_1219725_B.1|20C|_2020-04-17
Finland_EPI_ISL_756252_B.1.463|20A|_2020-09-17
Finland_EPI_ISL_1233208_B.1|20C|_2020-04-22
Finland_EPI_ISL_759785_B.1.36.22|20A|_2020-10-23
Finland_EPI_ISL_759816_B.1|20A|_2020-03-24
Finland_EPI_ISL_1842149_B.1.36.22|20A|_2021-02-12
Finland_EPI_ISL_862085_B.1.36.22|20A|_2020-09-29
Finland_EPI_ISL_1240690_B.1|20C|_2020-06-03
Finland_EPI_ISL_2030896_B.1.351|Beta|_2021-03-09
Finland_EPI_ISL_1842661_B.1.351|Beta|_2021-03-09
Finland_EPI_ISL_1842724_B.1.351|Beta|_2021-03-08
Finland_EPI_ISL_1240941_B.1|20A|_2020-04-04
Finland_EPI_ISL_756012_B.1.463|20A|_2020-10-04
Finland_EPI_ISL_481718_B.1.158|20A|_2020-05-07
Finland_EPI_ISL_413604_B.1.1|20B|_2020-03-03
Finland_EPI_ISL_412971_B.1|20A|_2020-02-25
Finland_EPI_ISL_995886_B.1.160|20A|_2021-01-11
Finland_EPI_ISL_2363788_B.1.1.523|20B|_2021-04-27
Finland_EPI_ISL_2363833_B.1.351|Beta|_2021-04-29
Finland_EPI_ISL_2363846_B.1.351|Beta|_2021-05-02
Finland_EPI_ISL_2363951_B.1.351|Beta|_2021-04-29
Finland_EPI_ISL_2364006_B.1.617.2|Delta|_2021-04-30
Finland_EPI_ISL_1842578_B.1.36.31|20A|_2021-02-10
Finland_EPI_ISL_1842371_B.1.36.22|20A|_2021-02-01
France_EPI_ISL_728317_B.1.160|20A|_2020-11-17
France_EPI_ISL_660368_B.1|20A|_2020-05-02
France_EPI_ISL_1696075_B.1.258|20A|_2021-03-02
France_EPI_ISL_416502_B.1|20C|_2020-02-26
France_EPI_ISL_1015368_B.1.160|20A|_2020-11-01
France_EPI_ISL_1111013_B.1.160|20A|_2021-02-02
France_EPI_ISL_1389323_L.3|20B|_2021-03-16
France_EPI_ISL_792002_B.1.160|20A|_2020-12-18
France_EPI_ISL_1655754_B.1.221|20A|_2021-02-13
France_EPI_ISL_2361524_P.1|Gamma|_2021-05-14
France_EPI_ISL_1396714_B.1.160|20A|_2021-03-12
France_EPI_ISL_940542_B|19A|_2020-01-29
France_EPI_ISL_940551_B|19A|_2020-02-03
France_EPI_ISL_940541_B.1|20C|_2020-07-21
France_EPI_ISL_940191_B.1.160|20A|_2020-08-21
France_EPI_ISL_1015023_B.1|20C|_2020-03-11
France_EPI_ISL_406597_B|19A|_2020-01-23
France_EPI_ISL_420059_B.1|20A|_2020-03-21
France_EPI_ISL_2228661_B.1.351|Beta|_2021-05-07
France_EPI_ISL_2228706_B.1.351.2|Beta|_2021-05-03
France_EPI_ISL_2228853_B.1.351|Beta|_2021-05-11
France_EPI_ISL_1623563_B.1.351|Beta|_2021-03-31
France_EPI_ISL_2311215_B.1.351|Beta|_2021-02-23
France_EPI_ISL_1190818_B.1.160|20A|_2020-12-28
France_EPI_ISL_1749312_A.27|19B|_2021-02-26
France_EPI_ISL_2293042_B.1.351.2|Beta|_2021-02-25
France_EPI_ISL_2036241_B.1.177.50|20E.EU1|_2021-03-21
France_EPI_ISL_568899_B.1|20C|_2020-04-13
France_EPI_ISL_982230_B.1.160|20A|_2020-10-08
France_EPI_ISL_804512_B.1.177|20E.EU1|_2020-10-18
France_EPI_ISL_644475_N.2|20B|_2020-08-28
France_EPI_ISL_860912_B.1.177|20E.EU1|_2021-01-07
France_EPI_ISL_2029662_B.1.619|20A|_2021-04-23
France_EPI_ISL_1085571_B.1.160|20A|_2021-02-03
France_EPI_ISL_1085258_B.1.160|20A|_2021-02-16
China_EPI_ISL_1655075_R.1|20B|_2021-01-15
Gabon_EPI_ISL_1760555_B.1.351|Beta|_2021-02-21
Gabon_EPI_ISL_2036080_B.1.1.318|20B|_2021-03-23
Gabon_EPI_ISL_2036090_B.1.1.318|20B|_2021-03-30
Gabon_EPI_ISL_2424157_B.1.214.2|20A|_2021-04-08
Gabon_EPI_ISL_2424158_B.1.214.2|20A|_2021-04-08
Gabon_EPI_ISL_2442203_B.1.1.318|20B|_2021-05-01
Gabon_EPI_ISL_2442277_B.1.1.318|20B|_2021-05-07
Gabon_EPI_ISL_2442279_B.1.1.318|20B|_2021-05-07
Gabon_EPI_ISL_2424161_B.1.1.318|20B|_2021-05-12
Gabon_EPI_ISL_2424162_B.1.1.318|20B|_2021-05-12
Gabon_EPI_ISL_2424163_B.1.1.318|20B|_2021-05-12
Gabon_EPI_ISL_2434971_B.1.1.318|20B|_2021-05-14
Gabon_EPI_ISL_2137843_B.1|20C|_2021-02-14
Gabon_EPI_ISL_2156806_B.1|20C|_2021-02-10
Gabon_EPI_ISL_539573_A|19B|_2020-03-22
Gabon_EPI_ISL_539575_A|19B|_2020-03-27
Gambia_EPI_ISL_1234530_B.1.1|20B|_2021-02-15
Gambia_EPI_ISL_1234533_B.1.416|20A|_2021-02-19
Gambia_EPI_ISL_1620181_B.1.1.420|20B|_2021-03-07
Gambia_EPI_ISL_2142745_B.1.1.420|20B|_2021-03-09
Gambia_EPI_ISL_1234531_B.1.416|20A|_2020-12-22
Gambia_EPI_ISL_561027_B.1.1|20B|_2020-05-20
Gambia_EPI_ISL_561133_B.1.1.466|20B|_2020-07-21
Gambia_EPI_ISL_1216076_B.1.416|20A|_2021-02-06
Gambia_EPI_ISL_1216077_B.1.416|20A|_2021-02-06
Gambia_EPI_ISL_811037_B.1.416|20A|_2020-10-01
Georgia_EPI_ISL_763062_B.1.1.10|20B|_2020-12-21
Georgia_EPI_ISL_1921879_B.1.1|20B|_2020-11-04
Georgia_EPI_ISL_1791050_B.1.258|20A|_2021-02-17
Georgia_EPI_ISL_1791045_B.1.1|20B|_2021-02-23
Georgia_EPI_ISL_1791064_P.2|20B|_2021-01-21
Georgia_EPI_ISL_1791055_B.1.1|20B|_2021-02-28
Georgia_EPI_ISL_2348499_B.1.617.2|Delta|_2021-05-12
Georgia_EPI_ISL_2319000_B.1.1.141|20B|_2021-05-07
Georgia_EPI_ISL_2319005_B.1.1.141|20B|_2021-05-15
Georgia_EPI_ISL_2319007_B.1.617.2|Delta|_2021-05-15
Germany_EPI_ISL_2390374_C.36.3.1|20D|_2021-06-02
Germany_EPI_ISL_406862_B.1|20A|_2020-01-28
Germany_EPI_ISL_1751112_B.1.177|20E.EU1|_2020-11-17
Germany_EPI_ISL_1751605_B.1.1.515|20B|_2020-07-23
Germany_EPI_ISL_1145003_B.1.258|20A|_2021-02-01
Germany_EPI_ISL_815261_C.35|20D|_2020-07-13
Germany_EPI_ISL_775670_B.1|20C|_2020-03-20
Germany_EPI_ISL_776449_B.1|20C|_2020-03-14
Germany_EPI_ISL_959961_B.1.1.405|20B|_2020-09-24
Germany_EPI_ISL_959900_B.1.1.294|20B|_2020-08-15
Germany_EPI_ISL_960090_B.1.1|20B|_2020-07-30
Germany_EPI_ISL_1716030_B.1.258|20E.EU1|_2021-03-10
Germany_EPI_ISL_2388665_B.1.351.3|Beta|_2021-05-15
Germany_EPI_ISL_1154482_B.1.1.317|20B|_2021-02-16
Germany_EPI_ISL_1154724_B.1.258|20A|_2021-02-16
Germany_EPI_ISL_413488_B.3|19A|_2020-02-28
Germany_EPI_ISL_414499_B.3|19A|_2020-02-26
Germany_EPI_ISL_1346812_B.1.177|20E.EU1|_2021-02-09
Germany_EPI_ISL_1347672_B.1.177.77|20E.EU1|_2021-02-20
Germany_EPI_ISL_572333_B.1.1|20B|_2020-06-08
Germany_EPI_ISL_860476_B.1.329|20C|_2020-06-21
Germany_EPI_ISL_860488_B.1.329|20C|_2020-06-16
Germany_EPI_ISL_860507_B.1.329|20C|_2020-06-16
Germany_EPI_ISL_487427_B.1.329|20C|_2020-05-25
Germany_EPI_ISL_1140280_B.1.177|20E.EU1|_2020-10-05
Germany_EPI_ISL_1140365_B.1|20A|_2020-11-13
Germany_EPI_ISL_1155949_B.1.177.75|20E.EU1|_2021-02-16
Germany_EPI_ISL_2113374_B.1.351|Beta|_2021-04-29
Germany_EPI_ISL_776559_B.1.22|20A|_2020-03-18
Germany_EPI_ISL_1152662_B.1.258|20A|_2021-02-04
Ghana_EPI_ISL_515103_A|19B|_2020-04-25
Ghana_EPI_ISL_515106_A|19B|_2020-05-25
Ghana_EPI_ISL_1018090_B.1.1.7|20B|_2020-12-22
Ghana_EPI_ISL_2376389_B.1.525|Eta|_2021-03-10
Ghana_EPI_ISL_2376384_A.27|19B|_2021-02-24
Ghana_EPI_ISL_944732_B.1.525|Eta|_2021-01-06
Ghana_EPI_ISL_1255113_A.11|19B|_2020-08-04
Ghana_EPI_ISL_1255170_B.1.1.239|20B|_2020-12-02
Ghana_EPI_ISL_1255262_B.1.1|20B|_2020-11-23
Ghana_EPI_ISL_2422515_B.1.1|20B|_2020-10-27
Ghana_EPI_ISL_2422540_B.1.351|Beta|_2021-03-03
Ghana_EPI_ISL_2422549_C.36.3|20D|_2021-03-18
Ghana_EPI_ISL_2422562_B.1.351|Beta|_2021-03-24
Ghana_EPI_ISL_2422594_B.1.1.318|20B|_2021-04-03
Ghana_EPI_ISL_2422603_B.1.525|Eta|_2021-02-03
Ghana_EPI_ISL_2422625_B.1.1.318|20B|_2021-04-03
Ghana_EPI_ISL_2285841_B.1.525|Eta|_2021-04-04
Ghana_EPI_ISL_2285866_B.1.351.2|Beta|_2021-04-21
Greece_EPI_ISL_1420767_C.35|20D|_2021-01-26
Greece_EPI_ISL_1716714_B.1.351|Beta|_2021-01-14
Greece_EPI_ISL_2232059_B.1|20C|_2020-04-15
Greece_EPI_ISL_434486_B.1.1|20B|_2020-03-13
Greece_EPI_ISL_501230_B.1.1|20B|_2020-04-24
Greece_EPI_ISL_2370750_B.1.1.318|20B|_2021-04-22
Greece_EPI_ISL_2364968_B.1.1.318|20B|_2021-04-28
Greece_EPI_ISL_2301696_B.1.1.70|20B|_2020-08-26
Greece_EPI_ISL_2301715_B.1|20C|_2020-09-14
Greece_EPI_ISL_2365048_B.1.1.318|20B|_2021-05-10
Greece_EPI_ISL_2365250_B.1.1.318|20B|_2021-05-11
Greece_EPI_ISL_437892_B.40|19A|_2020-03-19
Greece_EPI_ISL_2232063_B.1|20C|_2020-04-27
Greece_EPI_ISL_447651_B.1.1|20B|_2020-03-09
Greece_EPI_ISL_2231952_B.1.258|20A|_2020-11-08
Greece_EPI_ISL_2302081_B.1.177|20E.EU1|_2020-11-14
Greece_EPI_ISL_2302084_AD.2|20B|_2020-11-14
Greece_EPI_ISL_2233695_B.1.398|20A|_2020-11-08
Greece_EPI_ISL_434466_B.40|19A|_2020-04-04
Greece_EPI_ISL_2312609_B.1.1|20B|_2020-07-22
Greece_EPI_ISL_2232122_B.1.1.305|20B|_2020-12-14
Greece_EPI_ISL_2301773_B.1.1|20B|_2020-07-30
Greece_EPI_ISL_2301623_B.1.36|20A|_2020-12-08
Greece_EPI_ISL_2301653_B.1.177|20E.EU1|_2020-12-10
Greece_EPI_ISL_2232201_B.1.1.189|20B|_2020-08-06
Greece_EPI_ISL_2301856_B.1.177|20E.EU1|_2020-12-23
Greece_EPI_ISL_451310_B.1.1|20B|_2020-03-28
Greece_EPI_ISL_1497521_B.1.177|20E.EU1|_2021-02-02
Guadeloupe_EPI_ISL_1013417_B.1.2|20G|_2021-02-01
Guadeloupe_EPI_ISL_1219950_B.1.351|Beta|_2021-02-23
Guadeloupe_EPI_ISL_1416976_B.1.177.72|20E.EU1|_2021-02-19
Guadeloupe_EPI_ISL_1416990_B.1.160|20A|_2021-03-10
Guadeloupe_EPI_ISL_1517463_B.1.351|Beta|_2021-03-02
Guatemala_EPI_ISL_837551_B.1|20A|_2020-06-25
Guatemala_EPI_ISL_837585_B.1.1.71|20B|_2020-07-10
Guatemala_EPI_ISL_1533984_B.1.1.432|20B|_2020-11-01
Guatemala_EPI_ISL_509695_B.1|20A|_2020-03-13
Guatemala_EPI_ISL_509701_A|19B|_2020-03-19
Guinea_Bissau_EPI_ISL_2110859_B.1.1.420|20B|_2021-02-05
Guyana_EPI_ISL_2230692_B.1|20C|_2020-03-27
Guyana_EPI_ISL_2230694_B.1.1.33|20B|_2020-09-11
Guyana_EPI_ISL_2230696_B.1.1.33|20B|_2020-12-29
Haiti_EPI_ISL_2157369_B.1|20A|_2021-01-12
Haiti_EPI_ISL_2157559_B.1.575|20C|_2021-02-01
Haiti_EPI_ISL_2157562_B.1|20A|_2020-04-21
Haiti_EPI_ISL_2157568_B.1.478|20A|_2020-05-15
Haiti_EPI_ISL_2157370_B.1|20A|_2020-12-27
China_EPI_ISL_1678790_B.1.1.243|20B|_2021-03-18
China_EPI_ISL_1678810_B.1.1.243|20B|_2021-03-19
Honduras_EPI_ISL_2157350_B.1|20A|_2021-02-16
Honduras_EPI_ISL_2157356_B.1|20A|_2021-02-19
Honduras_EPI_ISL_2157378_A.2.5|19B|_2021-02-18
Honduras_EPI_ISL_2157360_B.1.1|20B|_2021-02-18
Hong_Kong_EPI_ISL_2296530_B.1.351|Beta|_2021-05-05
Hong_Kong_EPI_ISL_2296538_A|19B|_2020-01-23
Hong_Kong_EPI_ISL_2296639_B.1.1.306|20A|_2021-02-09
Hong_Kong_EPI_ISL_2296640_B.1.1.306|20A|_2021-02-09
Hong_Kong_EPI_ISL_2296641_B.1.1.306|20A|_2021-02-09
Hong_Kong_EPI_ISL_2296642_B.1.1.306|20A|_2021-02-09
Hong_Kong_EPI_ISL_2296643_B.1.1.306|20A|_2021-02-09
Hong_Kong_EPI_ISL_2296644_B.1.1.306|20A|_2021-02-09
Hong_Kong_EPI_ISL_2296688_B.1.351|Beta|_2021-02-15
Hong_Kong_EPI_ISL_2296689_B.1.351|Beta|_2021-02-27
Hong_Kong_EPI_ISL_2296527_P.3|Theta|_2021-03-30
Hong_Kong_EPI_ISL_2296690_B.1.351|Beta|_2021-05-05
Hong_Kong_EPI_ISL_2296528_P.3|Theta|_2021-03-25
Hong_Kong_EPI_ISL_2378705_B.1.351|Beta|_2021-04-17
Hong_Kong_EPI_ISL_2378704_B.1.351|Beta|_2021-04-30
Hong_Kong_EPI_ISL_2378700_B.1.351|Beta|_2021-05-05
Hong_Kong_EPI_ISL_2378701_B.1.351|Beta|_2021-05-05
Hong_Kong_EPI_ISL_2378702_B.1.351|Beta|_2021-05-05
Hong_Kong_EPI_ISL_2378707_B.1.351|Beta|_2021-05-07
Hong_Kong_EPI_ISL_2378708_B.1.351|Beta|_2021-05-12
Hong_Kong_EPI_ISL_498270_B.6|19A|_2020-05-08
Hong_Kong_EPI_ISL_1055454_B.1.177|20E.EU1|_2020-09-30
Hong_Kong_EPI_ISL_1205467_B.1.351|Beta|_2020-12-29
Hong_Kong_EPI_ISL_2423556_B.1.351|Beta|_2021-03-17
Hungary_EPI_ISL_1172027_B.1.22|20A|_2020-05-17
Hungary_EPI_ISL_1039980_B.1.22|20A|_2020-06-04
Hungary_EPI_ISL_1039836_C.35|20D|_2020-06-26
Hungary_EPI_ISL_1095627_B.1|20A|_2020-03-24
Hungary_EPI_ISL_1195207_B.1.160|20A|_2020-12-08
Hungary_EPI_ISL_1447296_B.1.160|20A|_2021-01-17
Hungary_EPI_ISL_1447295_B.1.160|20A|_2021-01-22
Hungary_EPI_ISL_1447311_B.1.258|20A|_2021-02-03
Hungary_EPI_ISL_1447310_B.1.160|20A|_2021-02-04
Hungary_EPI_ISL_1447307_B.1.258|20A|_2021-02-09
Hungary_EPI_ISL_1447316_B.1.258|20A|_2021-02-11
Hungary_EPI_ISL_1447298_B.1.258.17|20A|_2021-02-12
Hungary_EPI_ISL_1447317_B.1.160|20A|_2021-02-12
Hungary_EPI_ISL_1041200_B.1.160|20A|_2021-01-21
Hungary_EPI_ISL_1041210_B.1.160|20A|_2021-02-01
Hungary_EPI_ISL_435420_B.1|20A|_2020-03-23
Hungary_EPI_ISL_526235_B.1.1.87|20B|_2020-04-21
Hungary_EPI_ISL_526232_B.1|20A|_2020-04-16
Hungary_EPI_ISL_526233_B.1.1.87|20B|_2020-04-16
Hungary_EPI_ISL_671443_B.1.1|20B|_2020-09-02
Hungary_EPI_ISL_477618_B.1|20A|_2020-03-22
Hungary_EPI_ISL_677738_B.1.1.198|20B|_2020-08-31
Hungary_EPI_ISL_677746_B.1.1.70|20B|_2020-09-02
Iceland_EPI_ISL_417682_B.1|20C|_2020-03-10
Iceland_EPI_ISL_417765_B|19A|_2020-02-27
Iceland_EPI_ISL_1586287_B.35|19A|_2020-04-02
Iceland_EPI_ISL_417689_B|19A|_2020-03-13
Iceland_EPI_ISL_826693_B.1.1.232|20B|_2020-07-28
Iceland_EPI_ISL_826740_B.1.221|20A|_2021-01-01
Iceland_EPI_ISL_826854_B.1|20A|_2020-08-08
Iceland_EPI_ISL_827313_B.1.1.153|20B|_2020-12-05
Iceland_EPI_ISL_827551_B.1.1.232|20B|_2020-08-27
Iceland_EPI_ISL_827612_B.1.177.45|20E.EU1|_2020-09-26
Iceland_EPI_ISL_827737_B.1.1.232|20B|_2020-08-03
Iceland_EPI_ISL_828237_B.1.258|20A|_2020-10-01
Iceland_EPI_ISL_828403_B.1|20A|_2020-11-11
Iceland_EPI_ISL_828425_B.1.177.45|20E.EU1|_2020-09-29
Iceland_EPI_ISL_829026_B.1.177.45|20E.EU1|_2020-09-17
Iceland_EPI_ISL_829059_B.1.1.232|20B|_2020-08-18
Iceland_EPI_ISL_829821_B.1.1.232|20B|_2020-08-23
Iceland_EPI_ISL_829972_B.1.258|20A|_2021-01-04
Iceland_EPI_ISL_829982_B.1.177.45|20E.EU1|_2021-01-05
Iceland_EPI_ISL_830380_B.1.1|20B|_2020-08-29
Iceland_EPI_ISL_1586750_B|19A|_2020-03-27
Iceland_EPI_ISL_1585996_B|19A|_2020-04-01
Iceland_EPI_ISL_1586460_B.1|20A|_2020-04-17
India_EPI_ISL_1838400_C.36|20D|_2021-03-15
India_EPI_ISL_1838452_C.36|20D|_2021-03-17
India_EPI_ISL_1838522_C.36|20D|_2021-03-24
India_EPI_ISL_2373228_B.1.617.2|Delta|_2021-05-06
India_EPI_ISL_2441742_B.1.617.2|Delta|_2021-05-11
India_EPI_ISL_435089_B.6.6|19A|_2020-03-29
India_EPI_ISL_413522_B|19A|_2020-01-27
India_EPI_ISL_413523_B|19B|_2020-01-31
India_EPI_ISL_508429_B.1.1.306|20B|_2020-05-21
India_EPI_ISL_454537_A|19B|_2020-03-26
India_EPI_ISL_454555_B.6|19A|_2020-04-07
India_EPI_ISL_2373380_B.1.617.2|Delta|_2021-05-05
India_EPI_ISL_2373400_B.1.617.2|Delta|_2021-05-06
India_EPI_ISL_2373457_B.1.617.2|Delta|_2021-05-07
India_EPI_ISL_2373479_B.1.617.2|Delta|_2021-05-08
Iran_EPI_ISL_1061417_B.4|19A|_2020-03-10
India_EPI_ISL_581449_B.1.1|20B|_2020-08-04
Indonesia_EPI_ISL_1915556_B.1.214.2|20A|_2021-01-19
Indonesia_EPI_ISL_1915569_B.1.214.2|20A|_2021-03-15
Indonesia_EPI_ISL_1117590_B.1.1.398|20B|_2020-11-30
Indonesia_EPI_ISL_560991_B.6|19A|_2020-04-14
Indonesia_EPI_ISL_1469254_B.1.214.2|20A|_2021-03-01
Indonesia_EPI_ISL_1300661_B.1.1.398|20B|_2020-11-27
Indonesia_EPI_ISL_2434161_B.1|Delta|_2021-06-02
Indonesia_EPI_ISL_2434988_B.1.617.2|Delta|_2021-06-02
Indonesia_EPI_ISL_2434973_B.1.466.2|20A|_2021-06-02
Indonesia_EPI_ISL_2434173_B.1.466.2|20A|_2021-06-02
Indonesia_EPI_ISL_2434991_B.1.617.2|Delta|_2021-06-02
Indonesia_EPI_ISL_1915547_B.1.214.2|20A|_2021-04-17
Indonesia_EPI_ISL_1824610_B.1.214.2|20A|_2021-02-25
Indonesia_EPI_ISL_1915513_B.1.214.2|20A|_2021-02-26
Indonesia_EPI_ISL_1915515_B.1.214.2|20A|_2021-02-26
Indonesia_EPI_ISL_1915523_B.1.214.2|20A|_2021-03-16
Indonesia_EPI_ISL_1915535_B.1.214.2|20A|_2021-03-31
Indonesia_EPI_ISL_2382406_B.1.525|Eta|_2021-03-11
Indonesia_EPI_ISL_1915576_B.1.214.2|20A|_2021-04-09
Iran_EPI_ISL_1398925_B.4|19A|_2020-06-15
Iran_EPI_ISL_2360256_B.1.617.2|Delta|_2021-04-28
Iran_EPI_ISL_1014678_B.4.8|19A|_2020-08-22
Iran_EPI_ISL_959275_B.4|19A|_2020-04-06
Iran_EPI_ISL_445088_B.4|19A|_2020-03-26
Iran_EPI_ISL_637102_B.4|19A|_2020-03-10
Iran_EPI_ISL_2227268_B.1.617.2|Delta|_2021-05-11
Iran_EPI_ISL_2360252_B.1.617.2|Delta|_2021-04-28
Iran_EPI_ISL_2254498_B.1.1.51|20B|_2021-02-07
Iran_EPI_ISL_2254723_B.1.1.7|20B|_2021-02-07
Iraq_EPI_ISL_1524381_B.1.351|Beta|_2021-01-20
Iraq_EPI_ISL_812271_B.1.428.1|20C|_2020-06-16
Ireland_EPI_ISL_1191275_B.1.525|Eta|_2021-02-17
Ireland_EPI_ISL_1093044_B.1.177.67|20E.EU1|_2021-02-03
Ireland_EPI_ISL_528480_B.1.177|20E.EU1|_2020-08-13
Ireland_EPI_ISL_501261_B.1|20B|_2020-06-12
Ireland_EPI_ISL_2246819_B.1.1.318|20B|_2021-05-03
Ireland_EPI_ISL_500580_B.1.1|20B|_2020-07-06
Ireland_EPI_ISL_525362_B.1.258.2|20A|_2020-07-30
Ireland_EPI_ISL_671893_B.1.177.39|20E.EU1|_2020-10-13
Ireland_EPI_ISL_837352_B.1.258|20A|_2020-12-28
Ireland_EPI_ISL_644252_B.1.1.267|20B|_2020-06-09
Ireland_EPI_ISL_732520_B.1.177.52|20E.EU1|_2020-10-18
Ireland_EPI_ISL_512106_B.1.258.2|20A|_2020-07-25
Ireland_EPI_ISL_525395_B.1.258.2|20A|_2020-08-03
Ireland_EPI_ISL_1093041_A|19B|_2021-02-02
Ireland_EPI_ISL_1696521_B.1.177.56|20E.EU1|_2020-11-09
Ireland_EPI_ISL_1696497_B.1.177.54|20E.EU1|_2021-01-11
Ireland_EPI_ISL_767724_B.1|20C|_2020-06-12
Ireland_EPI_ISL_525361_B.1.258.2|20A|_2020-07-30
Ireland_EPI_ISL_578202_B.1.177|20E.EU1|_2020-09-16
Ireland_EPI_ISL_500576_B.1.36|20A|_2020-07-04
Ireland_EPI_ISL_1092948_B.1.36|20A|_2021-02-01
Ireland_EPI_ISL_752584_B.1.177.55|20E.EU1|_2020-11-24
Ireland_EPI_ISL_981235_B.1|20C|_2020-05-03
Israel_EPI_ISL_2085509_B.1.351.2|Beta|_2021-03-30
Israel_EPI_ISL_2085777_B.1.525|Eta|_2021-04-02
Israel_EPI_ISL_2183296_B.1.525|Eta|_2021-04-26
Israel_EPI_ISL_2183479_B.1.1.523|20B|_2021-04-29
Israel_EPI_ISL_2183727_B.1.617.2|Delta|_2021-05-09
Israel_EPI_ISL_2183806_B.1.1.523|20B|_2021-05-10
Israel_EPI_ISL_516921_B.1.1.50|20B|_2020-06-28
Israel_EPI_ISL_944226_B.1.466.1|20A|_2020-12-24
Israel_EPI_ISL_1240650_B.1.1.50|20B|_2020-08-17
Israel_EPI_ISL_514293_B.1.1.50|20B|_2020-07-20
Israel_EPI_ISL_649094_B.1.1|20B|_2020-02-27
Israel_EPI_ISL_575334_B.1.362|20C|_2020-09-01
Israel_EPI_ISL_2096775_B.1.1.50|20B|_2020-09-16
Israel_EPI_ISL_2096776_B.1.1.50|20B|_2020-10-13
Israel_EPI_ISL_419211_B|19A|_2020-02-23
Italy_EPI_ISL_806802_B.1.177.75|20E.EU1|_2020-12-18
Italy_EPI_ISL_529024_B.1|20A|_2020-05-14
Italy_EPI_ISL_722856_B.1.1.305|20B|_2020-07-18
Italy_EPI_ISL_722917_B.1.177.75|20E.EU1|_2020-10-16
Italy_EPI_ISL_722919_B.1.177.33|20E.EU1|_2020-10-17
Italy_EPI_ISL_722883_B.1.177.83|20E.EU1|_2020-10-26
Italy_EPI_ISL_477197_B.1.1|20B|_2020-04-03
Italy_EPI_ISL_1167368_B.1.177.44|20E.EU1|_2021-02-25
Italy_EPI_ISL_1169113_B.1.177.44|20E.EU1|_2021-02-28
Italy_EPI_ISL_837275_B.1.1|20B|_2020-09-03
Italy_EPI_ISL_837443_B.1.177|20E.EU1|_2020-11-25
Italy_EPI_ISL_960535_B.1.1|20B|_2020-12-16
Italy_EPI_ISL_776906_B.1.177.75|20E.EU1|_2020-10-26
Italy_EPI_ISL_778759_B.1.1.187|20B|_2020-06-30
Italy_EPI_ISL_833559_B.1|20A|_2020-04-24
Italy_EPI_ISL_1792926_P.1.1|Gamma|_2021-04-20
Italy_EPI_ISL_1632796_B.1.177.75|20E.EU1|_2021-02-12
Italy_EPI_ISL_1633063_B.1.177|20E.EU1|_2021-02-23
Italy_EPI_ISL_1692789_C.18|20D|_2020-09-14
Italy_EPI_ISL_2438751_C.37|20D|_2021-06-03
Italy_EPI_ISL_977650_B.1.258.24|20A|_2021-02-03
Italy_EPI_ISL_1855062_B.1.221|20A|_2020-09-21
Italy_EPI_ISL_603162_B.1.1|20B|_2020-06-04
Italy_EPI_ISL_603185_B.1.1.202|20B|_2020-05-22
Italy_EPI_ISL_2450761_B.1.177|20E.EU1|_2020-11-02
Italy_EPI_ISL_1015535_B.1.258|20A|_2021-02-03
Italy_EPI_ISL_1110311_B.1.177|20E.EU1|_2021-02-12
Italy_EPI_ISL_2372806_B.1.617.2|Delta|_2021-05-18
Italy_EPI_ISL_1416317_P.1.1|Gamma|_2021-03-11
Italy_EPI_ISL_1336843_B.1.177|20E.EU1|_2021-03-09
Italy_EPI_ISL_763323_B.1.160|20A|_2020-10-19
Italy_EPI_ISL_1260934_B.1.160|20A|_2021-02-03
Italy_EPI_ISL_1181813_B.1|20A|_2020-05-13
Italy_EPI_ISL_1181816_B.1|20A|_2020-09-03
Italy_EPI_ISL_1064075_B|19A|_2020-02-27
Japan_EPI_ISL_1046778_C.36|20D|_2021-02-02
Japan_EPI_ISL_1198812_C.36|20D|_2021-02-18
Japan_EPI_ISL_2131739_B.1.617.2|Delta|_2021-05-05
Japan_EPI_ISL_2131778_B.1.617.2|Delta|_2021-05-09
Japan_EPI_ISL_2131784_B.1.617.2|Delta|_2021-05-09
Philippines_EPI_ISL_2253117_B.1.351|Beta|_2021-05-12
Philippines_EPI_ISL_2253124_B.1.351|Beta|_2021-05-16
Japan_EPI_ISL_684112_B.12|19A|_2020-02-29
Japan_EPI_ISL_901108_B.1.1.284|20B|_2020-08-12
Japan_EPI_ISL_901251_B.1.1.48|20B|_2020-05-02
Jordan_EPI_ISL_635778_B.1.466|20A|_2020-07-04
Jordan_EPI_ISL_1406179_P.1|Gamma|_2021-03-09
Jordan_EPI_ISL_1406189_B.1.351.3|Beta|_2021-03-07
Jordan_EPI_ISL_1406195_B.1.351.3|Beta|_2021-03-09
Jordan_EPI_ISL_1406239_A.28|19B|_2021-03-20
Jordan_EPI_ISL_1824717_B.1.351|Beta|_2021-04-18
Jordan_EPI_ISL_1824718_A.29|19B|_2021-04-18
Jordan_EPI_ISL_1822601_B.1.617.1|Kappa|_2021-04-21
Jordan_EPI_ISL_1823177_B.1.617.1|Kappa|_2021-04-25
Jordan_EPI_ISL_1823202_B.1.351|Beta|_2021-04-16
Jordan_EPI_ISL_1970827_B.1.1.312|20B|_2021-02-10
Jordan_EPI_ISL_1970830_A.28|19B|_2021-02-09
Jordan_EPI_ISL_2105673_B.1.617.2|Delta|_2021-04-26
Jordan_EPI_ISL_755128_B.1.1.312|20B|_2020-09-14
China_EPI_ISL_850950_B.1.9|20A|_2020-10-30
Kazakhstan_EPI_ISL_454497_A.2|19B|_2020-05-14
Kazakhstan_EPI_ISL_1448018_B.1.1.141|20B|_2021-02-24
Kazakhstan_EPI_ISL_1448020_B.1.177.53|20E.EU1|_2021-02-26
Kazakhstan_EPI_ISL_2438661_B.1.1.7|20B|_2021-03-18
Kenya_EPI_ISL_968955_B.1|20C|_2020-11-28
Kenya_EPI_ISL_969018_B.1.351|Beta|_2021-01-28
Kenya_EPI_ISL_1440115_B.1.351|Beta|_2021-02-25
Kenya_EPI_ISL_1440118_B.1.351|Beta|_2021-02-25
Kosovo_EPI_ISL_1027653_B.1.177.75|20E.EU1|_2021-01-04
Kosovo_EPI_ISL_1027648_B.1.177|20E.EU1|_2021-01-05
Kosovo_EPI_ISL_904008_C.35|20D|_2020-12-09
Latvia_EPI_ISL_450518_B.1.1|20B|_2020-04-18
Latvia_EPI_ISL_450523_B.1|20A|_2020-04-28
Latvia_EPI_ISL_486390_B.1.1.350|20B|_2020-05-09
Latvia_EPI_ISL_486410_B.1|20A|_2020-05-09
Latvia_EPI_ISL_486411_B.1.1|20B|_2020-05-07
Latvia_EPI_ISL_486424_B.1|20A|_2020-03-22
Latvia_EPI_ISL_486430_B.1|20A|_2020-03-22
Latvia_EPI_ISL_486437_B.1.1|20B|_2020-04-30
Latvia_EPI_ISL_492999_B.1.1|20B|_2020-07-09
Latvia_EPI_ISL_426287_B.59|20B|_2020-03-30
Latvia_EPI_ISL_501808_B.1.164|20A|_2020-07-06
Latvia_EPI_ISL_512313_B.1.1.162|20B|_2020-06-17
Latvia_EPI_ISL_515188_B.1.164|20A|_2020-08-04
Latvia_EPI_ISL_1312522_B.1.177|20E.EU1|_2020-10-02
Latvia_EPI_ISL_534199_B.1.164|20A|_2020-08-06
Latvia_EPI_ISL_1312667_B.1.177|20E.EU1|_2020-10-05
Latvia_EPI_ISL_1312683_B.1|20B|_2020-11-19
Latvia_EPI_ISL_1613504_B.1.1.141|20B|_2021-03-16
Latvia_EPI_ISL_1613863_B.1.177.79|20E.EU1|_2021-03-30
Latvia_EPI_ISL_1590634_B.1.1.141|20B|_2021-02-09
Latvia_EPI_ISL_1590654_B.1.177.79|20E.EU1|_2021-02-15
Latvia_EPI_ISL_1590656_B.1.177.79|20E.EU1|_2021-02-15
Latvia_EPI_ISL_1970707_B.1.1.141|20B|_2021-02-15
Latvia_EPI_ISL_1590724_B.1.1.429|20B|_2021-02-25
Latvia_EPI_ISL_1590078_B.1.177.79|20E.EU1|_2021-02-25
Latvia_EPI_ISL_1590782_B.1.177.79|20E.EU1|_2021-02-26
Latvia_EPI_ISL_1590808_B.1.177.79|20E.EU1|_2021-03-03
Latvia_EPI_ISL_1590842_B.1.1.374|20B|_2021-03-10
Latvia_EPI_ISL_1590870_B.1.177.60|20E.EU1|_2021-03-09
Latvia_EPI_ISL_1590458_B.1.177.79|20E.EU1|_2021-03-15
Latvia_EPI_ISL_1590945_U.3|20E.EU1|_2021-03-15
Latvia_EPI_ISL_770047_B.1.131|20A|_2020-09-02
Latvia_EPI_ISL_770035_S.1|20B|_2020-09-16
Latvia_EPI_ISL_2141781_B.1.1.374|20B|_2021-04-12
Latvia_EPI_ISL_2141841_B.1.177.60|20E.EU1|_2021-04-05
Latvia_EPI_ISL_2141916_B.1.1.374|20B|_2021-04-20
Latvia_EPI_ISL_2141992_B.1.177.79|20E.EU1|_2021-04-20
Latvia_EPI_ISL_961829_B.1.177|20E.EU1|_2021-01-21
Latvia_EPI_ISL_1219224_B.1.177|20E.EU1|_2021-02-03
Latvia_EPI_ISL_1219229_B.1.177.79|20E.EU1|_2021-02-03
Latvia_EPI_ISL_1219403_B.1.1.141|20B|_2021-02-12
Latvia_EPI_ISL_1219480_B.1.177.79|20E.EU1|_2021-02-02
Latvia_EPI_ISL_1219633_B.1.1.141|20B|_2021-02-19
Latvia_EPI_ISL_1219683_B.1.1.141|20B|_2021-02-22
Latvia_EPI_ISL_1312400_B.1.1.280|20B|_2020-09-28
Latvia_EPI_ISL_1312415_B.1.1.429|20B|_2020-10-01
Latvia_EPI_ISL_1312431_B.1.1.429|20B|_2020-09-30
Latvia_EPI_ISL_1312437_S.1|20B|_2020-09-28
Latvia_EPI_ISL_1312459_B.1.1|20B|_2020-09-30
Lebanon_EPI_ISL_637113_B.1.398|20A|_2020-08-14
Lebanon_EPI_ISL_1009160_B.1.398|20A|_2020-10-01
Lebanon_EPI_ISL_450515_B.4|19A|_2020-03-11
China_EPI_ISL_498694_B.1.1.317|20B|_2020-07-22
Liechtenstein_EPI_ISL_1233628_B.1.258|20A|_2020-10-23
Liechtenstein_EPI_ISL_1233663_B.1.258.17|20A|_2020-11-16
Liechtenstein_EPI_ISL_1036069_B.1.258|20A|_2020-12-18
Liechtenstein_EPI_ISL_1299916_B.1.258|20A|_2020-12-31
Liechtenstein_EPI_ISL_1036126_B.1.258|20A|_2020-12-15
Liechtenstein_EPI_ISL_1036070_B.1.258|20A|_2020-12-19
Lithuania_EPI_ISL_560393_B.1.1|20B|_2020-05-23
Lithuania_EPI_ISL_560396_B.1.1.30|20B|_2020-05-25
Lithuania_EPI_ISL_560405_B.1.1.30|20B|_2020-06-03
Lithuania_EPI_ISL_933997_B.1.177.60|20E.EU1|_2020-12-07
Lithuania_EPI_ISL_934307_B.1.177.60|20E.EU1|_2021-01-16
Lithuania_EPI_ISL_1302597_B.1.1.280|20B|_2021-02-16
Lithuania_EPI_ISL_1302622_B.1.177.60|20E.EU1|_2021-02-15
Lithuania_EPI_ISL_1654719_B.1.177.79|20E.EU1|_2021-02-22
Lithuania_EPI_ISL_1654806_B.1.177.60|20E.EU1|_2021-02-22
Lithuania_EPI_ISL_1579919_B.1.177.60|20E.EU1|_2021-02-25
Lithuania_EPI_ISL_1657149_B.1.177.79|20E.EU1|_2021-02-03
Lithuania_EPI_ISL_1654965_B.1.177.79|20E.EU1|_2021-02-20
Lithuania_EPI_ISL_1580235_B.1.416|20A|_2021-03-06
Lithuania_EPI_ISL_2428034_C.36|20D|_2021-05-10
Lithuania_EPI_ISL_1579860_B.1.177.60|20E.EU1|_2021-03-22
Lithuania_EPI_ISL_636842_B.1.1|20B|_2020-07-28
Lithuania_EPI_ISL_603092_B.53|19A|_2020-04-07
Lithuania_EPI_ISL_636878_B.1.1.280|20B|_2020-08-31
Lithuania_EPI_ISL_636886_B.1.1.277|20B|_2020-09-04
Lithuania_EPI_ISL_603109_B.53|19A|_2020-04-19
Lithuania_EPI_ISL_603110_B.53|19A|_2020-04-19
Lithuania_EPI_ISL_1252745_B.1.177.60|20E.EU1|_2021-02-21
Lithuania_EPI_ISL_1252705_B.1.177|20E.EU1|_2021-02-02
Lithuania_EPI_ISL_1315227_B.1.177.60|20E.EU1|_2021-03-01
Lithuania_EPI_ISL_1315250_B.1.177.79|20E.EU1|_2021-02-26
Lithuania_EPI_ISL_1315261_B.1.177.60|20E.EU1|_2021-03-02
Lithuania_EPI_ISL_1324625_B.1.177.60|20E.EU1|_2021-02-15
Lithuania_EPI_ISL_914886_B.1.258|20A|_2020-10-31
Luxembourg_EPI_ISL_419562_B.1|20A|_2020-02-29
Luxembourg_EPI_ISL_739733_B.1.1.297|20B|_2020-08-27
Luxembourg_EPI_ISL_2401633_B.1.617.2|Delta|_2021-05-15
Luxembourg_EPI_ISL_910970_B.1.160|20A|_2020-12-13
Luxembourg_EPI_ISL_1383584_B.1.160|20A|_2021-02-15
Luxembourg_EPI_ISL_1383624_B.1.160|20A|_2021-02-18
Luxembourg_EPI_ISL_910501_B.1.177|20E.EU1|_2020-12-19
Luxembourg_EPI_ISL_2401375_P.1.1|Gamma|_2021-05-03
Luxembourg_EPI_ISL_910406_B.1.221.4|20A|_2020-12-05
Luxembourg_EPI_ISL_445066_B.1|20A|_2020-04-24
Luxembourg_EPI_ISL_1523316_B.1.351|Beta|_2021-03-17
Luxembourg_EPI_ISL_910531_B.1.160|20A|_2020-12-20
Luxembourg_EPI_ISL_1917941_B.1.351|Beta|_2021-03-31
Luxembourg_EPI_ISL_1523319_B.1.351|Beta|_2021-03-19
Luxembourg_EPI_ISL_428941_B.1.211|20A|_2020-04-03
Luxembourg_EPI_ISL_744169_B.1.221|20A|_2020-11-06
Luxembourg_EPI_ISL_771011_B.1.160.21|20A|_2020-12-02
Luxembourg_EPI_ISL_1498605_B.1.1|20B|_2021-02-23
Luxembourg_EPI_ISL_1498381_B.1.221|20A|_2021-01-26
Luxembourg_EPI_ISL_744500_B.1.1|20B|_2020-07-06
Luxembourg_EPI_ISL_445076_B.1.94|20A|_2020-04-22
Luxembourg_EPI_ISL_1498502_B.1.351|Beta|_2021-02-04
Luxembourg_EPI_ISL_771134_B.1.177.52|20E.EU1|_2020-12-28
Luxembourg_EPI_ISL_744724_B.1.1|20B|_2020-06-28
Luxembourg_EPI_ISL_419599_B.1.12|20C|_2020-03-16
Luxembourg_EPI_ISL_1498456_B.1.221|20A|_2021-02-04
Luxembourg_EPI_ISL_1523336_B.1.351|Beta|_2021-03-23
Luxembourg_EPI_ISL_413593_B.1|20A|_2020-02-29
Madagascar_EPI_ISL_1660241_B.1|20B|_2021-01-12
Madagascar_EPI_ISL_1660303_B.1.1|20B|_2021-01-12
Madagascar_EPI_ISL_1660272_B.1.351.2|Beta|_2021-02-15
Madagascar_EPI_ISL_1660273_B.1.351.2|Beta|_2021-02-15
Madagascar_EPI_ISL_1660274_B.1.351.2|Beta|_2021-02-15
Madagascar_EPI_ISL_1660279_B.1.351.2|Beta|_2021-02-23
Madagascar_EPI_ISL_1660286_B.1.351.2|Beta|_2021-02-22
Madagascar_EPI_ISL_1660288_B.1.351.2|Beta|_2021-03-01
Madagascar_EPI_ISL_1660289_B.1.351.2|Beta|_2021-03-01
Madagascar_EPI_ISL_1660290_B.1.351.2|Beta|_2021-03-01
Madagascar_EPI_ISL_1660291_B.1.1|20B|_2020-08-11
Madagascar_EPI_ISL_1660225_B.1.1|20B|_2020-10-28
Madagascar_EPI_ISL_1672387_B.1.1|20B|_2020-10-27
Madagascar_EPI_ISL_677635_B.6|19A|_2020-03-26
Malaysia_EPI_ISL_506999_B.6.1|19A|_2020-03-26
Malaysia_EPI_ISL_2233382_B.1.617.2|Delta|_2021-05-04
Malaysia_EPI_ISL_1263458_B.1.351|Beta|_2021-02-28
Malaysia_EPI_ISL_1424143_B.1.351|Beta|_2021-02-26
Malaysia_EPI_ISL_1696746_B.1.351|Beta|_2021-03-08
Malaysia_EPI_ISL_1696747_B.1.351|Beta|_2021-03-09
Malaysia_EPI_ISL_1673332_B.1.351|Beta|_2021-03-10
Malaysia_EPI_ISL_1673341_B.1.351|Beta|_2021-03-17
Malaysia_EPI_ISL_1787317_C.36|20D|_2021-04-10
Malaysia_EPI_ISL_2090890_B.1.351|Beta|_2021-05-03
Malaysia_EPI_ISL_2090886_B.1.351|Beta|_2021-05-03
Malaysia_EPI_ISL_490094_B.6.2|19A|_2020-05-23
Malaysia_EPI_ISL_490096_B.6.2|19A|_2020-05-23
Malaysia_EPI_ISL_490099_B.6.2|19A|_2020-05-23
Malaysia_EPI_ISL_2379433_B.1.617.2|Delta|_2021-05-04
Malaysia_EPI_ISL_728161_B.1.524|20A|_2020-09-30
Malaysia_EPI_ISL_718279_B.1.1.354|20B|_2020-08-16
Malaysia_EPI_ISL_2342548_B.1.351|Beta|_2021-04-01
Malaysia_EPI_ISL_2342550_B.1.351|Beta|_2021-04-03
Malaysia_EPI_ISL_718143_B.6|19A|_2020-07-08
Mali_EPI_ISL_683835_B.1|20A|_2020-06-10
Malta_EPI_ISL_2102070_B.1.351|Beta|_2021-04-21
Malta_EPI_ISL_2105949_P.1|Gamma|_2021-05-01
Malta_EPI_ISL_2105951_P.1|Gamma|_2021-05-01
Malta_EPI_ISL_2105952_P.1|Gamma|_2021-05-01
Malta_EPI_ISL_2107888_P.1|Gamma|_2021-05-09
Malta_EPI_ISL_2107892_P.1.1|Gamma|_2021-05-09
Malta_EPI_ISL_2399457_C.36.3|20D|_2021-05-20
Malta_EPI_ISL_2399546_C.36.3|20D|_2021-05-26
Mauritius_EPI_ISL_1827689_B.1.1|20B|_2021-03-13
Mauritius_EPI_ISL_1827696_B.1.1|20B|_2021-03-14
Mexico_EPI_ISL_933709_B.1.1.222|20B|_2020-12-16
Mexico_EPI_ISL_1302240_B.1.1.222|20B|_2021-02-02
Mexico_EPI_ISL_1558829_P.2|20B|_2021-02-28
Mexico_EPI_ISL_1558831_P.2|20B|_2021-02-18
Mexico_EPI_ISL_2391681_P.1|Gamma|_2021-05-03
Mexico_EPI_ISL_2401975_P.4|Gamma|_2021-04-28
Mexico_EPI_ISL_2401979_P.4|Gamma|_2021-04-27
Mexico_EPI_ISL_1279275_A.2.5|19B|_2021-02-19
Mexico_EPI_ISL_961773_B.1.1.432|20B|_2020-07-11
Mexico_EPI_ISL_1279419_B.1.1.222|20B|_2021-02-16
Mexico_EPI_ISL_1351471_B.1.1|20B|_2021-02-23
Mexico_EPI_ISL_1091259_B.1.558|20A|_2020-10-16
Mexico_EPI_ISL_1060685_B.1.1.222|20B|_2020-07-27
Mexico_EPI_ISL_1279301_B.1.1|20B|_2021-02-17
Latvia_EPI_ISL_2141680_B.1.177.79|20E.EU1|_2021-04-08
Latvia_EPI_ISL_2141910_B.1.177.79|20E.EU1|_2021-04-28
Netherlands_EPI_ISL_523012_B.1.8|20A|_2020-06-14
Netherlands_EPI_ISL_523035_B.1.22|20A|_2020-07-02
Netherlands_EPI_ISL_523048_B.11|19A|_2020-07-05
Poland_EPI_ISL_732951_B.1.1|20B|_2020-11-17
Poland_EPI_ISL_732952_B.1.1|20B|_2020-11-17
Poland_EPI_ISL_732953_B.1.1|20B|_2020-11-17
Poland_EPI_ISL_732949_B.1.1|20B|_2020-11-17
Moldova_EPI_ISL_523968_B.1|20A|_2020-03-11
Moldova_EPI_ISL_516938_B.1.1|20B|_2020-06-17
Moldova_EPI_ISL_516936_B.1.1|20B|_2020-06-17
Monaco_EPI_ISL_1336649_B.1.177.51|20E.EU1|_2021-01-21
Monaco_EPI_ISL_1201507_B.1.1.176|20B|_2021-02-22
Monaco_EPI_ISL_1219962_B.1.160|20A|_2021-02-22
Monaco_EPI_ISL_1219949_B.1.351.2|Beta|_2021-02-22
Monaco_EPI_ISL_1219963_B.1.160|20A|_2021-02-22
Mongolia_EPI_ISL_1805958_B.1.1.46|20B|_2021-02-16
Mongolia_EPI_ISL_1805959_B.1.1.46|20B|_2021-02-20
Mongolia_EPI_ISL_1805960_B.1.1.46|20B|_2021-02-22
Mongolia_EPI_ISL_1805961_B.1.1.46|20B|_2021-02-26
Mongolia_EPI_ISL_1805962_B.1.1.46|20B|_2021-03-09
Mongolia_EPI_ISL_1805744_B.1.1.46|20B|_2020-12-26
Mongolia_EPI_ISL_1805651_B.40|19A|_2020-03-18
Mongolia_EPI_ISL_626627_B.1|20A|_2020-04-15
Montenegro_EPI_ISL_516924_B.1|20A|_2020-03-19
Montenegro_EPI_ISL_516927_C.35|20D|_2020-07-17
Montenegro_EPI_ISL_516931_C.35|20D|_2020-07-19
Montenegro_EPI_ISL_516933_C.35|20D|_2020-07-19
Morocco_EPI_ISL_966940_B.1|20A|_2020-07-01
Morocco_EPI_ISL_476559_B.1|20A|_2020-02-27
Mozambique_EPI_ISL_887495_B.1.36.31|20A|_2020-12-24
Mozambique_EPI_ISL_1132841_B.1.351|Beta|_2021-01-16
Mozambique_EPI_ISL_2442086_B.1.351|Beta|_2021-03-03
Mozambique_EPI_ISL_2442087_B.1.351|Beta|_2021-03-03
Mozambique_EPI_ISL_2442088_B.1.351|Beta|_2021-02-01
Mozambique_EPI_ISL_2442091_B.1.351|Beta|_2021-03-04
Mozambique_EPI_ISL_2442100_B.1.351|Beta|_2021-02-12
Mozambique_EPI_ISL_2442159_B.1.351|Beta|_2021-01-21
Nepal_EPI_ISL_754068_B.1.1.216|20B|_2020-07-30
Nepal_EPI_ISL_410301_B|19A|_2020-01-13
Nepal_EPI_ISL_2171267_B.1.617.2|Delta|_2021-05-08
Netherlands_EPI_ISL_2145088_B.1.221|20A|_2021-03-02
Netherlands_EPI_ISL_460992_B.1.1.282|20B|_2020-05-23
Netherlands_EPI_ISL_723451_B.1.177|20E.EU1|_2020-11-20
Netherlands_EPI_ISL_904449_B.1|20A|_2020-10-23
Netherlands_EPI_ISL_904446_B.1.177.81|20E.EU1|_2020-10-22
Netherlands_EPI_ISL_904451_B.1.177|20E.EU1|_2020-10-25
Netherlands_EPI_ISL_547478_B.3|19A|_2020-07-14
Netherlands_EPI_ISL_422734_B|19A|_2020-03-25
Netherlands_EPI_ISL_415489_B.55|19A|_2020-03-13
Netherlands_EPI_ISL_455147_B.1.1.71|20B|_2020-04-04
Netherlands_EPI_ISL_455231_L.2|20B|_2020-04-06
Netherlands_EPI_ISL_523402_B.1.8|20A|_2020-05-01
Netherlands_EPI_ISL_722524_B.1.221|20A|_2020-10-21
Netherlands_EPI_ISL_1310898_B.1.221|20A|_2020-11-14
Netherlands_EPI_ISL_636504_B.11|19A|_2020-02-27
Netherlands_EPI_ISL_1371689_B.1.351|Beta|_2021-03-13
Netherlands_EPI_ISL_454752_B.11|19A|_2020-02-28
Netherlands_EPI_ISL_763175_B.1.177.81|20E.EU1|_2020-12-10
Netherlands_EPI_ISL_632625_B.1.221|20A|_2020-10-07
Netherlands_EPI_ISL_791016_B.1.221|20A|_2020-12-22
Netherlands_EPI_ISL_1165634_B.1.221|20A|_2021-02-13
Netherlands_EPI_ISL_1371576_B.1.160|20A|_2021-03-12
Netherlands_EPI_ISL_1310974_B.1.160|20A|_2021-02-06
Netherlands_EPI_ISL_2145424_P.1|Gamma|_2021-04-02
Netherlands_EPI_ISL_2145754_B.1.221|20A|_2020-10-08
Netherlands_EPI_ISL_523730_B.1.22|20A|_2020-08-02
Netherlands_EPI_ISL_523735_B.1.1.232|20B|_2020-07-26
Netherlands_EPI_ISL_523797_B.1.221|20A|_2020-08-12
New_Zealand_EPI_ISL_707804_B.1.177|20E.EU1|_2020-12-06
New_Zealand_EPI_ISL_413490_B.4|19A|_2020-02-27
New_Zealand_EPI_ISL_579493_B.31|19A|_2020-04-01
New_Zealand_EPI_ISL_548138_B.1.1.317|20B|_2020-07-07
New_Zealand_EPI_ISL_1250696_B.1.1.317|20B|_2021-03-06
New_Zealand_EPI_ISL_1016873_B.1.351|Beta|_2021-02-05
New_Zealand_EPI_ISL_1016872_B.1.351|Beta|_2021-02-07
New_Zealand_EPI_ISL_1172030_B.1.36.31|20A|_2021-02-21
New_Zealand_EPI_ISL_1172028_B.1.1.317|20B|_2021-02-21
New_Zealand_EPI_ISL_1172031_C.36|20D|_2021-02-22
New_Zealand_EPI_ISL_1469107_B.1.351|Beta|_2021-03-19
New_Zealand_EPI_ISL_1469089_B.1.351|Beta|_2021-03-26
New_Zealand_EPI_ISL_1904853_C.36.3|20D|_2021-04-20
New_Zealand_EPI_ISL_2103200_A.2.5|19B|_2021-05-06
New_Zealand_EPI_ISL_2406490_B.1.617.2|Delta|_2021-05-18
New_Zealand_EPI_ISL_2406487_R.1|20B|_2021-05-23
New_Zealand_EPI_ISL_2406495_B.1.617.2|Delta|_2021-05-17
Niger_EPI_ISL_2188485_B.1.525|Eta|_2021-04-01
Niger_EPI_ISL_2188486_B.1.525|Eta|_2021-04-01
Niger_EPI_ISL_2188487_B.1.525|Eta|_2021-04-01
Niger_EPI_ISL_2188488_B.1.525|Eta|_2021-04-01
Nigeria_EPI_ISL_2285320_B.1.525|Eta|_2021-02-13
Nigeria_EPI_ISL_1715365_L.3|20B|_2021-01-03
Nigeria_EPI_ISL_872604_L.3|20B|_2020-09-05
Nigeria_EPI_ISL_2243550_A|19B|_2020-07-22
Nigeria_EPI_ISL_2242183_L.3|20B|_2020-12-22
Nigeria_EPI_ISL_2432953_B.1.525|Eta|_2021-05-17
Nigeria_EPI_ISL_1915793_B.1.525|Eta|_2021-04-02
Nigeria_EPI_ISL_455427_A|19B|_2020-03-29
UK_EPI_ISL_531357_B.1.258|20A|_2020-08-17
North_Macedonia_EPI_ISL_910326_B.1.1.70|20B|_2020-10-13
North_Macedonia_EPI_ISL_910327_B.1.1.70|20B|_2020-10-14
North_Macedonia_EPI_ISL_942962_B.1.1.58|20B|_2020-12-06
North_Macedonia_EPI_ISL_942970_B.1.1.70|20B|_2020-12-14
North_Macedonia_EPI_ISL_944777_B.1.1.428|20B|_2020-12-21
North_Macedonia_EPI_ISL_954301_B.1.1.70|20B|_2020-12-24
North_Macedonia_EPI_ISL_1137611_B.1.1.70|20B|_2021-01-03
North_Macedonia_EPI_ISL_1137614_B.1.36|20A|_2021-01-07
North_Macedonia_EPI_ISL_2392162_B.1.1|20B|_2020-04-08
North_Macedonia_EPI_ISL_1138744_B.1.258.17|20A|_2021-02-01
North_Macedonia_EPI_ISL_1138754_B.1.258.17|20A|_2021-02-04
North_Macedonia_EPI_ISL_1138760_B.1.258.17|20A|_2021-02-05
North_Macedonia_EPI_ISL_1141320_B.1|20A|_2021-02-12
North_Macedonia_EPI_ISL_1142575_B.1.1.70|20B|_2021-02-12
North_Macedonia_EPI_ISL_2392161_B.1.1|20B|_2020-03-10
North_Macedonia_EPI_ISL_949176_B.1|20A|_2021-01-23
North_Macedonia_EPI_ISL_1191769_B.1.258.17|20A|_2021-02-20
North_Macedonia_EPI_ISL_677717_B.1.1|20B|_2020-07-20
North_Macedonia_EPI_ISL_1191746_B.1.1.70|20B|_2021-02-04
North_Macedonia_EPI_ISL_1191745_B.1|20A|_2021-02-06
North_Macedonia_EPI_ISL_1180157_B.1.258.17|20A|_2021-02-08
North_Macedonia_EPI_ISL_677674_B.1.1|20B|_2020-05-20
North_Macedonia_EPI_ISL_677723_B.1.1|20B|_2020-08-04
North_Macedonia_EPI_ISL_678250_B.1|20A|_2020-08-10
North_Macedonia_EPI_ISL_492084_B.1.1|20B|_2020-06-25
North_Macedonia_EPI_ISL_933568_B.1.1.70|20B|_2020-10-24
Norway_EPI_ISL_1919387_C.36|20D|_2021-04-06
Norway_EPI_ISL_1897582_B.1.177.60|20E.EU1|_2021-04-23
Norway_EPI_ISL_2225891_C.36|20D|_2021-04-19
Norway_EPI_ISL_2357868_B.1.525|Eta|_2021-05-09
Norway_EPI_ISL_417484_B.4|19A|_2020-02-26
Norway_EPI_ISL_420134_B.1|20A|_2020-02-28
Norway_EPI_ISL_2226155_B.1.1|20B|_2020-02-29
Norway_EPI_ISL_447839_B.1|20A|_2020-03-24
Norway_EPI_ISL_2425854_B.1|20A|_2020-05-08
Norway_EPI_ISL_2333114_B.1|20C|_2020-04-04
Norway_EPI_ISL_2425930_B.1|20A|_2020-06-22
Norway_EPI_ISL_493356_B.1.242|20A|_2020-06-26
Norway_EPI_ISL_1317878_B.1.177|20E.EU1|_2021-01-31
Norway_EPI_ISL_500773_B.1.1.277|20B|_2020-07-02
Norway_EPI_ISL_500785_B.1.242|20A|_2020-07-06
Norway_EPI_ISL_500787_B.1.242|20A|_2020-07-07
Norway_EPI_ISL_500799_B.1.236|20A|_2020-07-13
Norway_EPI_ISL_1317906_B.1.1.333|20B|_2021-02-03
Norway_EPI_ISL_549103_B.1.1.39|20B|_2020-07-26
Norway_EPI_ISL_2426028_B.1.1.302|20B|_2020-08-04
Norway_EPI_ISL_1040163_B.1.160|20A|_2021-02-06
Norway_EPI_ISL_635117_B.1.36|20A|_2020-07-31
Norway_EPI_ISL_1192244_B.1.258|20A|_2021-02-03
Norway_EPI_ISL_1192232_B.1.351|Beta|_2021-02-09
Norway_EPI_ISL_1186085_B.1.351|Beta|_2021-02-15
Norway_EPI_ISL_1186090_B.1.351|Beta|_2021-02-15
Norway_EPI_ISL_590973_B.1.160|20A|_2020-09-21
Norway_EPI_ISL_1317628_B.1.351|Beta|_2021-02-16
Norway_EPI_ISL_1254532_B.1.177|20E.EU1|_2021-02-12
Norway_EPI_ISL_1254569_B.1.351|Beta|_2021-02-26
Norway_EPI_ISL_708038_B.1.1.277|20B|_2020-10-27
Norway_EPI_ISL_1820804_K.3|20B|_2020-11-13
Norway_EPI_ISL_450349_B.1.439|20A|_2020-03-29
Norway_EPI_ISL_450346_B.1|20C|_2020-03-25
Oman_EPI_ISL_491986_B.6|19A|_2020-05-19
Oman_EPI_ISL_1532300_B.1.1.27|20B|_2020-09-27
Oman_EPI_ISL_457706_B.4|19A|_2020-03-02
Oman_EPI_ISL_457937_B.4|19A|_2020-03-15
Oman_EPI_ISL_457701_B.4|19A|_2020-02-23
Oman_EPI_ISL_457704_B.4|19A|_2020-02-24
Pakistan_EPI_ISL_417444_B.4|19A|_2020-03-04
Pakistan_EPI_ISL_2151345_B.1.36.31|20A|_2020-12-10
Pakistan_EPI_ISL_779276_B|19A|_2020-07-02
Pakistan_EPI_ISL_779263_B.6.6|19A|_2020-05-03
Pakistan_EPI_ISL_451958_B|19A|_2020-03-16
Pakistan_EPI_ISL_632908_B.6|19A|_2020-04-01
Pakistan_EPI_ISL_709542_B.1.36.31|20A|_2020-10-15
Pakistan_EPI_ISL_1697282_B.1.36.31|20A|_2020-11-26
Pakistan_EPI_ISL_1710510_B.1.36.31|20A|_2021-01-05
Pakistan_EPI_ISL_1732172_B.1.36|20A|_2021-02-09
Pakistan_EPI_ISL_2313084_B.1.351|Beta|_2021-05-16
Pakistan_EPI_ISL_2434174_B.1.617.2|Delta|_2021-05-22
Pakistan_EPI_ISL_2100471_B.1.351|Beta|_2021-04-09
Pakistan_EPI_ISL_2100503_B.1.351|Beta|_2021-04-11
Palestine_EPI_ISL_596509_B.35|19A|_2020-03-21
Palestine_EPI_ISL_596558_B.1.1.50|20B|_2020-06-22
Palestine_EPI_ISL_596560_B.1.1.50|20B|_2020-06-22
Palestine_EPI_ISL_596561_B.1.1.50|20B|_2020-06-22
Palestine_EPI_ISL_596567_B.1.1.50|20B|_2020-07-17
Palestine_EPI_ISL_1273102_B.1.1.50|20B|_2021-01-04
Palestine_EPI_ISL_1502572_B.1.1.50|20B|_2021-02-05
Palestine_EPI_ISL_1502575_B.1.1.50|20B|_2021-02-06
Palestine_EPI_ISL_1502580_B.1.1.50|20B|_2021-02-06
Panama_EPI_ISL_496615_B|19A|_2020-02-15
Panama_EPI_ISL_1503064_A.2.5|19B|_2021-02-06
Panama_EPI_ISL_1503088_A.2.5.2|19B|_2021-02-11
Panama_EPI_ISL_1503101_A.2.5.2|19B|_2021-02-17
Panama_EPI_ISL_1503119_A.2.5.2|19B|_2021-02-28
Papua_New_Guinea_EPI_ISL_693483_B.6.8|19A|_2020-10-06
Papua_New_Guinea_EPI_ISL_1322330_B.6.8|19A|_2021-01-09
Papua_New_Guinea_EPI_ISL_1307659_B.6|19A|_2020-12-05
Papua_New_Guinea_EPI_ISL_693475_B.6.8|19A|_2020-07-20
Papua_New_Guinea_EPI_ISL_1307677_B.6.8|19A|_2021-02-22
Papua_New_Guinea_EPI_ISL_1424584_AU.1|20A|_2021-02-26
Papua_New_Guinea_EPI_ISL_1424616_B.6|19A|_2021-03-03
Papua_New_Guinea_EPI_ISL_1424618_B.6.8|19A|_2021-03-03
Papua_New_Guinea_EPI_ISL_2283748_AU.3|20A|_2021-04-01
Papua_New_Guinea_EPI_ISL_2283753_AU.3|20A|_2021-04-01
Papua_New_Guinea_EPI_ISL_2283755_B.1|20A|_2021-04-01
Papua_New_Guinea_EPI_ISL_2283758_AU.3|20A|_2021-04-01
Papua_New_Guinea_EPI_ISL_2283762_AU.3|20A|_2021-04-01
Paraguay_EPI_ISL_1340751_B.1.1.28|20B|_2020-11-06
Paraguay_EPI_ISL_1340750_B.1.1.33|20B|_2020-11-13
Paraguay_EPI_ISL_1340761_B.1.1.28|20B|_2020-06-24
Paraguay_EPI_ISL_1340760_B.1|20A|_2020-06-25
Paraguay_EPI_ISL_1340754_B.1.1.28|20B|_2020-10-06
Paraguay_EPI_ISL_2444797_P.2|20B|_2021-03-07
Paraguay_EPI_ISL_2444833_A.2.5.2|19B|_2021-03-07
Paraguay_EPI_ISL_2444792_P.2|20B|_2021-03-14
Paraguay_EPI_ISL_2444803_A.2.5.2|19B|_2021-03-25
Paraguay_EPI_ISL_2444802_A.2.5.2|19B|_2021-03-25
Paraguay_EPI_ISL_2444836_A.2.5.2|19B|_2021-04-12
Paraguay_EPI_ISL_2444835_A.2.5.2|19B|_2021-04-12
Paraguay_EPI_ISL_2444821_P.1|Gamma|_2021-05-02
Paraguay_EPI_ISL_2444819_P.1|Gamma|_2021-05-03
Paraguay_EPI_ISL_2444817_P.1.2|Gamma|_2021-05-02
Paraguay_EPI_ISL_2444814_P.1|Gamma|_2021-05-01
Paraguay_EPI_ISL_1492670_P.1|Gamma|_2021-02-21
Paraguay_EPI_ISL_1492672_A.2.5.2|19B|_2021-02-22
Peru_EPI_ISL_729916_C.14|20D|_2020-09-21
Peru_EPI_ISL_491429_A.2|19B|_2020-03-25
Peru_EPI_ISL_1111223_A|19B|_2020-03-12
Peru_EPI_ISL_1137488_C.32|20D|_2020-11-18
Peru_EPI_ISL_1664258_C.13|20D|_2020-05-20
Peru_EPI_ISL_1629792_C.37|20D|_2021-02-13
Peru_EPI_ISL_1629796_C.37|20D|_2021-02-13
Peru_EPI_ISL_1629801_C.37|20D|_2021-02-26
Peru_EPI_ISL_1629802_C.37|20D|_2021-03-08
Peru_EPI_ISL_1629804_C.37|20D|_2021-03-13
Peru_EPI_ISL_1629805_C.37|20D|_2021-03-10
Peru_EPI_ISL_1591097_C.37|20D|_2021-02-20
Philippines_EPI_ISL_2090614_B.1.351|Beta|_2021-04-07
Philippines_EPI_ISL_2090616_B.1.351|Beta|_2021-04-08
Philippines_EPI_ISL_2090615_B.1.351|Beta|_2021-04-08
Philippines_EPI_ISL_434557_B.6|19A|_2020-03-27
Philippines_EPI_ISL_2105424_B.1.1.28|20B|_2021-02-03
Philippines_EPI_ISL_2156201_B.1.525|Eta|_2021-02-11
Philippines_EPI_ISL_2155921_L.3|20B|_2021-02-16
Poland_EPI_ISL_2350914_B.1.617.2|Delta|_2021-05-11
Poland_EPI_ISL_512300_B.1.1|20B|_2020-06-07
Poland_EPI_ISL_1495045_B.1.1|20B|_2020-05-22
Poland_EPI_ISL_1007950_B.1.258|20A|_2021-02-02
Poland_EPI_ISL_1008732_B.1.1|20B|_2021-01-29
Poland_EPI_ISL_754906_B.1.1.277|20B|_2020-08-28
Poland_EPI_ISL_1084642_B.1.177|20E.EU1|_2021-01-21
Poland_EPI_ISL_1273770_B.1.221|20A|_2021-02-01
Poland_EPI_ISL_2161263_B.1.351|Beta|_2021-04-15
Poland_EPI_ISL_882960_B.1.1|20B|_2020-10-29
Poland_EPI_ISL_645000_B.1.187|20A|_2020-04-23
Poland_EPI_ISL_645061_B.1.213|20A|_2020-06-06
Poland_EPI_ISL_645063_B.1.1.277|20B|_2020-06-06
Poland_EPI_ISL_645065_B.1.1.277|20B|_2020-06-06
Poland_EPI_ISL_645075_B.1.1|20B|_2020-04-28
Poland_EPI_ISL_645084_B.1.213|20A|_2020-05-10
Poland_EPI_ISL_451649_B.1.1.1|20D|_2020-04-27
Poland_EPI_ISL_1239047_B.1.221|20A|_2021-03-02
Poland_EPI_ISL_906752_B.1|20C|_2020-08-30
Poland_EPI_ISL_451663_B.1.1|20B|_2020-05-05
Portugal_EPI_ISL_453982_B.1|20A|_2020-04-04
Portugal_EPI_ISL_454296_B.1|20A|_2020-04-11
Portugal_EPI_ISL_511728_B.1|20C|_2020-03-25
Portugal_EPI_ISL_693568_B.1.1|20B|_2020-06-26
Portugal_EPI_ISL_693585_B.1.1.421|20B|_2020-06-30
Portugal_EPI_ISL_693595_B.1.1|20B|_2020-07-02
Portugal_EPI_ISL_693601_B.1|20B|_2020-07-05
Portugal_EPI_ISL_693531_B.1.1.198|20B|_2020-07-06
Portugal_EPI_ISL_731946_B.1.1|20B|_2020-05-13
Portugal_EPI_ISL_731967_AD.2|20B|_2020-11-12
Portugal_EPI_ISL_693640_B.1.1.394|20B|_2020-08-24
Portugal_EPI_ISL_1164255_B.1.177|20E.EU1|_2021-01-07
Portugal_EPI_ISL_1164281_B.1.177|20E.EU1|_2021-01-08
Portugal_EPI_ISL_1164314_B.1.177.85|20E.EU1|_2021-01-25
Portugal_EPI_ISL_1117230_C.16|20D|_2021-02-14
Portugal_EPI_ISL_1117252_B.1.177.52|20E.EU1|_2021-02-08
Portugal_EPI_ISL_1117302_B.1.177.72|20E.EU1|_2021-02-08
Portugal_EPI_ISL_1171987_P.2|20B|_2021-02-22
Portugal_EPI_ISL_1399460_B.1.160|20A|_2021-03-01
Portugal_EPI_ISL_1399418_A.21|19B|_2021-03-02
Portugal_EPI_ISL_1399583_B.1.177|20E.EU1|_2021-03-06
Portugal_EPI_ISL_1399519_B.1.160.26|20A|_2021-03-07
Portugal_EPI_ISL_1399528_B.1.177.6|20E.EU1|_2021-03-07
Portugal_EPI_ISL_1399607_B.1.351|Beta|_2021-03-08
Portugal_EPI_ISL_1399422_A.21|19B|_2021-03-11
Portugal_EPI_ISL_1399575_B.1.177.53|20E.EU1|_2021-03-09
Portugal_EPI_ISL_1494894_B.1.177.32|20E.EU1|_2021-02-09
Portugal_EPI_ISL_491281_B.1|20A|_2020-05-21
Portugal_EPI_ISL_491284_B.1.1.410|20B|_2020-05-25
Qatar_EPI_ISL_2408309_B.1.351|Beta|_2021-04-25
Qatar_EPI_ISL_2408330_B.1.617.2|Delta|_2021-05-18
Qatar_EPI_ISL_2408340_B.1.617.2|Delta|_2021-05-15
Qatar_EPI_ISL_2408365_C.36|20D|_2021-05-06
Qatar_EPI_ISL_2274424_B.1.351|Beta|_2021-04-08
Qatar_EPI_ISL_2274429_B.1.351|Beta|_2021-04-08
Qatar_EPI_ISL_1712899_B.1.411|19A|_2020-06-23
Qatar_EPI_ISL_1713194_C.36|20D|_2020-10-20
Qatar_EPI_ISL_1713207_B.1.428|20C|_2020-10-25
Qatar_EPI_ISL_1713234_B.1.428|20C|_2020-10-20
Qatar_EPI_ISL_1713592_B.1.351|Beta|_2021-02-15
Qatar_EPI_ISL_1713609_B.1.351|Beta|_2021-02-19
Qatar_EPI_ISL_1713635_B.1.351|Beta|_2021-02-20
Qatar_EPI_ISL_1713694_B.1.351|Beta|_2021-02-23
Qatar_EPI_ISL_1713776_B.1.351|Beta|_2021-03-13
Qatar_EPI_ISL_1714408_B|19A|_2020-08-11
China_EPI_ISL_850949_B.1.1|20B|_2020-08-16
China_EPI_ISL_591270_B.1.1|20B|_2020-09-24
France_EPI_ISL_1265837_B.1.351.2|Beta|_2021-02-23
France_EPI_ISL_2373827_B.1.351|Beta|_2021-05-11
France_EPI_ISL_1628896_B.1.177|20E.EU1|_2021-02-12
Romania_EPI_ISL_455476_B.1|20A|_2020-05-17
Romania_EPI_ISL_807154_B.1.258|20A|_2020-12-24
Romania_EPI_ISL_1969990_C.36|20D|_2021-04-22
Romania_EPI_ISL_2099851_P.1|Gamma|_2021-04-27
Romania_EPI_ISL_2099876_B.1.153|20D|_2021-05-05
Romania_EPI_ISL_2190108_B.1.351|Beta|_2021-05-10
Romania_EPI_ISL_2308249_B.1.617.2|Delta|_2021-05-18
Romania_EPI_ISL_1114771_B.1.1.317|20B|_2021-02-21
Romania_EPI_ISL_1116435_B.1.258|20A|_2021-02-20
Romania_EPI_ISL_1186113_B.1.258|20A|_2021-02-24
Romania_EPI_ISL_1186119_B.1.177|20E.EU1|_2021-02-25
Romania_EPI_ISL_1279947_B.1.1|20B|_2020-08-10
Romania_EPI_ISL_1279954_B.1.258|20A|_2020-09-21
Romania_EPI_ISL_1279956_B.1.258|20A|_2020-09-22
Romania_EPI_ISL_1279958_B.1.408|20A|_2020-09-30
Romania_EPI_ISL_639739_B.1.1|20B|_2020-07-20
Romania_EPI_ISL_1381315_B.1.258|20A|_2021-02-04
Romania_EPI_ISL_1381336_B.1.258.3|20A|_2021-02-07
Romania_EPI_ISL_1381358_B.1.258|20A|_2021-02-23
Romania_EPI_ISL_910029_B.1.177|20E.EU1|_2021-01-05
Romania_EPI_ISL_815390_B.1|20A|_2020-08-19
Romania_EPI_ISL_896375_B.1.258|20A|_2020-10-31
Romania_EPI_ISL_891227_B.1.258|20A|_2020-07-17
Romania_EPI_ISL_491047_B.1.180|20A|_2020-06-09
Romania_EPI_ISL_491048_B.1.180|20A|_2020-06-10
Romania_EPI_ISL_491055_B.1|20A|_2020-04-11
Romania_EPI_ISL_491061_B.1.180|20A|_2020-04-17
Romania_EPI_ISL_1508848_B.1.258|20A|_2020-10-07
Romania_EPI_ISL_2402317_B.1.526.2|Iota|_2021-04-17
Romania_EPI_ISL_2402318_B.1.526.2|Iota|_2021-04-17
Russia_EPI_ISL_2450580_B.1.1.317|20B|_2021-03-25
Russia_EPI_ISL_733220_B.1.1|20B|_2020-09-30
Russia_EPI_ISL_1039077_B.1.1.317|20B|_2020-11-27
Russia_EPI_ISL_1039108_B.1.1|20B|_2020-11-30
Russia_EPI_ISL_2385337_B.1.351|20B|_2021-04-06
Russia_EPI_ISL_2385342_B.1.351|20B|_2021-04-07
Russia_EPI_ISL_2385401_B.1.351|20B|_2021-04-28
Russia_EPI_ISL_2385419_B.1.351|20B|_2021-05-07
Russia_EPI_ISL_479624_B.1.1|20B|_2020-03-30
Russia_EPI_ISL_872914_B.1.1.397|20B|_2020-12-05
Russia_EPI_ISL_2031930_B.1.351|Beta|_2021-04-07
Russia_EPI_ISL_1363118_B.1.351|Beta|_2021-02-15
Russia_EPI_ISL_2035728_B.1.351|Beta|_2021-03-30
Russia_EPI_ISL_1710864_B.1.1.317|20B|_2021-02-03
Russia_EPI_ISL_1652669_B.1.1.317|20B|_2021-03-09
Russia_EPI_ISL_1712282_B.1.1.294|20B|_2020-05-31
Russia_EPI_ISL_2385224_B.1.526.1|20C|_2021-04-13
Russia_EPI_ISL_733352_B.1.1|20B|_2020-11-06
Russia_EPI_ISL_569787_B.1.1.506|20B|_2020-07-13
Russia_EPI_ISL_569831_B.1.1|20B|_2020-07-22
Russia_EPI_ISL_524025_B.1.1|20B|_2020-06-03
Russia_EPI_ISL_2245639_B.1.1|20B|_2021-02-24
Russia_EPI_ISL_2245671_B.1.1.317|20B|_2021-04-23
Russia_EPI_ISL_2385141_AT.1|20B|_2021-05-13
Russia_EPI_ISL_2385156_B.1.1.317|20B|_2021-05-17
Russia_EPI_ISL_2385202_B.1.1.523|20B|_2021-05-20
Russia_EPI_ISL_2450465_B.1.617.2|Delta|_2021-05-22
Russia_EPI_ISL_2450509_B.1.617.2|Delta|_2021-05-25
Russia_EPI_ISL_596247_B.1.1.407|20B|_2020-09-28
Russia_EPI_ISL_2450523_B.1.617.2|Delta|_2021-05-27
Russia_EPI_ISL_873026_B.1.1|20B|_2020-12-27
Russia_EPI_ISL_1372381_B.1.1.51|20B|_2021-01-13
Russia_EPI_ISL_1491681_B.1.1|20B|_2021-02-11
Russia_EPI_ISL_1491615_B.1.1.397|20B|_2021-02-14
Russia_EPI_ISL_1491699_B.1.1.317|20B|_2021-02-16
Russia_EPI_ISL_1491705_B.1.1.317|20B|_2021-02-25
Russia_EPI_ISL_1491724_B.1.1.317|20B|_2021-02-24
Russia_EPI_ISL_1664649_B.1.1.317|20B|_2021-02-11
Russia_EPI_ISL_1664727_B.1.1|20B|_2021-02-17
Russia_EPI_ISL_596289_B.1.1|20B|_2020-09-12
Russia_EPI_ISL_1652542_B.1.1|20B|_2021-03-17
Russia_EPI_ISL_1652627_B.1.1|20B|_2021-03-12
Russia_EPI_ISL_2245764_B.1.1.523|20B|_2021-04-22
Russia_EPI_ISL_2385273_B.1.1.317|20B|_2021-05-02
Russia_EPI_ISL_2385289_B.1.1.317|20B|_2021-05-06
Russia_EPI_ISL_2385336_B.1.1.523|20B|_2021-05-10
Russia_EPI_ISL_2450544_B.1.617.2|Delta|_2021-05-12
Russia_EPI_ISL_1919482_B.1.1.274|20B|_2021-02-19
Russia_EPI_ISL_450241_B.1.1.129|20B|_2020-04-15
Russia_EPI_ISL_1664755_B.1.1.397|20B|_2021-02-15
Russia_EPI_ISL_1652680_B.1|20B|_2021-03-14
Russia_EPI_ISL_602387_B.1.1.424|20B|_2020-09-21
Russia_EPI_ISL_732994_B.1.1.274|20B|_2020-07-23
Russia_EPI_ISL_733001_B.1.1|20B|_2020-08-08
Ukraine_EPI_ISL_2031957_B.1|20B|_2021-04-02
Rwanda_EPI_ISL_1063900_B.1.393|20A|_2020-10-18
Rwanda_EPI_ISL_735444_B.1|20A|_2020-10-19
Rwanda_EPI_ISL_925883_A.23.1|19B|_2020-10-21
Rwanda_EPI_ISL_925902_B.1.380|20A|_2020-11-03
Rwanda_EPI_ISL_1020288_A.27|19B|_2020-12-17
Rwanda_EPI_ISL_960228_B.1.380|20A|_2020-06-10
Rwanda_EPI_ISL_960301_B.1.380|20A|_2020-07-24
Rwanda_EPI_ISL_1302679_B.1.351|Beta|_2021-02-02
Rwanda_EPI_ISL_1302680_B.1.351.3|Beta|_2021-02-13
Rwanda_EPI_ISL_2362490_B.1.214.2|20A|_2021-03-08
Rwanda_EPI_ISL_2362493_B.1.351|Beta|_2021-02-26
Rwanda_EPI_ISL_2362496_B.1.351|Beta|_2021-02-26
Rwanda_EPI_ISL_2362502_B.1.351|Beta|_2021-02-05
Rwanda_EPI_ISL_2362507_B.1.351|Beta|_2021-02-18
Rwanda_EPI_ISL_2362512_B.1.351|Beta|_2021-02-22
Rwanda_EPI_ISL_2362515_B.1.351|Beta|_2021-03-23
Rwanda_EPI_ISL_2362518_B.1.351|Beta|_2021-03-23
Rwanda_EPI_ISL_2362520_A.23.1|19B|_2021-03-23
Rwanda_EPI_ISL_2362522_A.23.1|19B|_2021-03-25
Rwanda_EPI_ISL_2365914_B.1.214.2|20A|_2021-04-03
Saint_Barthlemy_EPI_ISL_613429_B.1|20A|_2020-03-13
Saudi_Arabia_EPI_ISL_512923_A|19B|_2020-08-04
Saudi_Arabia_EPI_ISL_751220_B.1.533|20B|_2020-05-24
Saudi_Arabia_EPI_ISL_2151337_B.1.351|Beta|_2021-04-15
UK_EPI_ISL_487899_B.1.93|20A|_2020-05-05
UK_EPI_ISL_2354115_B.1.617.2|Delta|_2021-05-22
Senegal_EPI_ISL_418216_A.2|19B|_2020-03-13
Senegal_EPI_ISL_498239_B.1.1|20B|_2020-05-27
Senegal_EPI_ISL_1167181_B.1|20B|_2021-02-02
Senegal_EPI_ISL_1167149_B.1.1.420|20B|_2021-01-14
Serbia_EPI_ISL_1017685_C.35|20D|_2020-12-13
Serbia_EPI_ISL_1017693_C.16|20D|_2021-01-26
Serbia_EPI_ISL_1654810_C.36|20D|_2021-01-29
Serbia_EPI_ISL_1654814_B.1.258|20A|_2021-02-05
Serbia_EPI_ISL_1654813_B.1.160|20A|_2021-02-04
Serbia_EPI_ISL_1654839_B.1.221|20A|_2021-02-21
Serbia_EPI_ISL_1654835_B.1.258.17|20A|_2021-03-08
Serbia_EPI_ISL_955164_C.16|20D|_2020-10-22
Serbia_EPI_ISL_661189_B.1.1|20B|_2020-03-12
Serbia_EPI_ISL_582532_B.1.1.70|20B|_2020-07-24
Serbia_EPI_ISL_644577_C.35|20D|_2020-07-24
Serbia_EPI_ISL_514426_B.1|20A|_2020-05-11
Serbia_EPI_ISL_462438_B.1|20A|_2020-04-22
Serbia_EPI_ISL_891267_C.35|20D|_2020-09-10
Serbia_EPI_ISL_833514_B.1.1.70|20B|_2020-07-23
Kosovo_EPI_ISL_904010_B.1.1|20B|_2020-11-09
Serbia_EPI_ISL_891268_C.16|20D|_2020-10-02
Serbia_EPI_ISL_661180_B.1.1.70|20B|_2020-06-15
Serbia_EPI_ISL_676576_B.1|20A|_2020-03-31
Serbia_EPI_ISL_676581_B.1|20A|_2020-04-08
Serbia_EPI_ISL_676589_B.1|20A|_2020-05-16
Serbia_EPI_ISL_644583_B.1.1.1|20D|_2020-04-05
China_EPI_ISL_850947_B.1.1|20B|_2020-04-19
Sierra_Leone_EPI_ISL_512816_A.12|19B|_2020-04-10
Sierra_Leone_EPI_ISL_512821_A.12|19B|_2020-04-27
Singapore_EPI_ISL_574541_B.6|19A|_2020-04-01
Singapore_EPI_ISL_596458_B.1.1.397|20B|_2020-10-05
Singapore_EPI_ISL_981023_B.1.177|20E.EU1|_2021-02-07
Singapore_EPI_ISL_995300_B.1.1.397|20B|_2021-02-08
Singapore_EPI_ISL_475999_B.6|19A|_2020-02-14
Singapore_EPI_ISL_1620154_B.1.351|Beta|_2021-04-08
Singapore_EPI_ISL_1704837_B.1.617.2|Delta|_2021-04-15
Singapore_EPI_ISL_803993_L.3|20B|_2021-01-01
Singapore_EPI_ISL_498599_B.6.6|19A|_2020-07-16
Singapore_EPI_ISL_500570_B.6.6|19A|_2020-06-05
Singapore_EPI_ISL_518003_B.6.6|19A|_2020-07-26
Singapore_EPI_ISL_2349765_B.1.617.2|Delta|_2021-04-30
Singapore_EPI_ISL_2349843_B.1.617.2|Delta|_2021-05-12
Singapore_EPI_ISL_2349866_B.1.617.2|Delta|_2021-05-12
Singapore_EPI_ISL_2349869_B.1.617.2|Delta|_2021-05-12
Sint_Maarten_EPI_ISL_1090255_B.1.575|20C|_2021-02-16
Sint_Maarten_EPI_ISL_1089591_P.2|20B|_2021-02-16
Sint_Maarten_EPI_ISL_1595933_B.1.526|Iota|_2021-02-22
Sint_Maarten_EPI_ISL_1595963_A.2.5|19B|_2021-02-27
Sint_Maarten_EPI_ISL_1595971_B.1.617.1|Kappa|_2021-03-19
Sint_Maarten_EPI_ISL_1595983_A.2.5|19B|_2021-02-27
Sint_Maarten_EPI_ISL_1596090_B.1.351|Beta|_2021-03-24
Sint_Maarten_EPI_ISL_1703572_B.1.526|Iota|_2021-03-29
Sint_Maarten_EPI_ISL_2220460_B.1.621|20A|_2021-05-10
Sint_Maarten_EPI_ISL_2303978_B.1.617.2|Delta|_2021-04-30
Sint_Maarten_EPI_ISL_2303979_B.1.617.1|Delta|_2021-05-06
Slovakia_EPI_ISL_2276072_C.35|20D|_2020-07-30
Slovakia_EPI_ISL_2276074_B.1.258|20A|_2020-08-11
Slovakia_EPI_ISL_2254726_B.1.1|20B|_2020-04-24
Slovakia_EPI_ISL_1180679_B.1.258|20A|_2020-12-22
Slovakia_EPI_ISL_1495228_B.1.160|20A|_2021-02-03
Slovakia_EPI_ISL_417877_B.1|20A|_2020-03-06
Slovakia_EPI_ISL_417878_B.1|20A|_2020-03-07
Slovakia_EPI_ISL_417880_B.11|19A|_2020-03-08
Slovakia_EPI_ISL_577734_B.1.1.266|20B|_2020-07-09
Slovakia_EPI_ISL_577741_B.1.131|20A|_2020-06-30
Slovakia_EPI_ISL_583484_B.1.160|20A|_2020-09-10
Slovakia_EPI_ISL_875535_B.1.1.170|20B|_2020-11-11
Slovakia_EPI_ISL_875538_B.1.1.170|20B|_2020-10-10
Slovakia_EPI_ISL_2227286_B.1.1.170|20B|_2020-10-20
Slovakia_EPI_ISL_2227287_B.1.1.170|20B|_2020-10-27
Slovenia_EPI_ISL_1056331_B.1.258.17|20A|_2021-02-03
Slovenia_EPI_ISL_1056578_B.1.1.70|20B|_2021-02-03
Slovenia_EPI_ISL_1112192_B.1.177.44|20E.EU1|_2021-02-10
Slovenia_EPI_ISL_1240383_B.1.258.17|20A|_2021-02-20
Slovenia_EPI_ISL_1499067_B.1.160|20A|_2020-09-22
Slovenia_EPI_ISL_1403438_B.1.258.17|20A|_2021-02-26
Slovenia_EPI_ISL_1403441_B.1.258.17|20A|_2021-02-26
Slovenia_EPI_ISL_1403370_B.1.258.17|20A|_2021-03-02
Slovenia_EPI_ISL_1403477_B.1.258.17|20A|_2021-03-02
Slovenia_EPI_ISL_1499100_B.1.160|20A|_2020-09-30
Slovenia_EPI_ISL_1098758_B.1.258.17|20A|_2020-10-13
Slovenia_EPI_ISL_1098781_B.1.258.17|20A|_2020-10-26
Slovenia_EPI_ISL_1065018_B.1.258.17|20A|_2021-02-10
Slovenia_EPI_ISL_1111933_B.1.258.17|20A|_2021-02-17
Slovenia_EPI_ISL_1267002_B.1.258.17|20A|_2021-03-05
Slovenia_EPI_ISL_1989084_B.1.258.17|20A|_2021-04-11
Slovenia_EPI_ISL_1964528_B.1.1.70|20B|_2020-11-10
Slovenia_EPI_ISL_1034298_B.1.258.17|20A|_2021-02-01
Slovenia_EPI_ISL_1654263_B.1.258.17|20A|_2021-03-18
Slovenia_EPI_ISL_1402222_B.1.258.17|20A|_2021-03-08
Slovenia_EPI_ISL_1964240_B.1.1.70|20B|_2020-12-02
Slovenia_EPI_ISL_1964385_B.1.258.17|20A|_2020-12-04
Slovenia_EPI_ISL_1964460_B.1.258.17|20A|_2020-12-11
Slovenia_EPI_ISL_635210_B.1|20A|_2020-03-08
Slovenia_EPI_ISL_1510945_C.35|20D|_2020-07-07
Slovenia_EPI_ISL_1250833_B.1.258.17|20A|_2021-01-29
Slovenia_EPI_ISL_1511094_B.1.1|20B|_2020-07-22
Slovenia_EPI_ISL_1266615_B.1.258.17|20A|_2021-01-22
Slovenia_EPI_ISL_1111811_B.1.258.17|20A|_2021-02-12
Slovenia_EPI_ISL_1112184_B.1.1.7|20A|_2021-02-18
Slovenia_EPI_ISL_1240298_B.1.258.17|20A|_2021-02-23
Slovenia_EPI_ISL_1491242_B.1.258.17|20A|_2021-03-18
Slovenia_EPI_ISL_1498926_B.1.258|20A|_2020-08-06
Slovenia_EPI_ISL_635241_B.1|20A|_2020-03-14
Slovenia_EPI_ISL_1265315_B.1.258.17|20A|_2021-02-18
Slovenia_EPI_ISL_1112098_B.1.258.17|20A|_2021-02-11
Slovenia_EPI_ISL_960304_B.1|20A|_2020-05-05
Slovenia_EPI_ISL_852616_B.1.236|20A|_2020-12-15
Slovenia_EPI_ISL_635279_B.1|20A|_2020-05-10
Somalia_EPI_ISL_2308255_B.1.1.326|20B|_2020-06-08
South_Africa_EPI_ISL_1817783_B.1.351|Beta|_2021-01-18
South_Africa_EPI_ISL_1914930_B.1.351|Beta|_2021-04-02
South_Africa_EPI_ISL_1914933_B.1.351|Beta|_2021-04-02
South_Africa_EPI_ISL_1817719_B.1.351|Beta|_2021-03-02
South_Africa_EPI_ISL_1817721_B.1.351|Beta|_2021-03-01
South_Africa_EPI_ISL_1817722_B.1.351|Beta|_2021-03-04
South_Africa_EPI_ISL_1817723_B.1.351|Beta|_2021-02-19
South_Africa_EPI_ISL_1817725_B.1.351|Beta|_2021-02-17
South_Africa_EPI_ISL_1817726_B.1.351|Beta|_2021-03-01
South_Africa_EPI_ISL_1817730_B.1.351|Beta|_2021-03-05
South_Africa_EPI_ISL_1817732_B.1.351|Beta|_2021-02-16
South_Africa_EPI_ISL_2375927_B.1.351|Beta|_2021-05-04
South_Africa_EPI_ISL_640041_B|19A|_2020-03-25
South_Africa_EPI_ISL_1817714_C.11|20D|_2020-05-04
South_Africa_EPI_ISL_700481_A|19B|_2020-05-09
South_Africa_EPI_ISL_1534261_B.1.351|Beta|_2021-02-08
South_Africa_EPI_ISL_1534275_B.1.351|Beta|_2021-02-18
South_Africa_EPI_ISL_1534301_B.1.351|Beta|_2021-02-19
South_Africa_EPI_ISL_1817691_B.1.351|Beta|_2021-03-04
South_Africa_EPI_ISL_2375995_B.1.351|Beta|_2021-05-05
South_Africa_EPI_ISL_2382266_B.1.351|Beta|_2021-05-11
South_Africa_EPI_ISL_1591396_B.1.351|Beta|_2021-02-05
South_Africa_EPI_ISL_1591441_B.1.351|Beta|_2021-02-12
South_Africa_EPI_ISL_1502154_B.1.351|Beta|_2021-03-11
South_Africa_EPI_ISL_1502170_B.1.351|Beta|_2021-03-10
South_Africa_EPI_ISL_1502190_B.1.351|Beta|_2021-03-10
South_Africa_EPI_ISL_1818917_B.1.351|Beta|_2021-02-10
South_Africa_EPI_ISL_2162315_B.1.351|Beta|_2021-05-04
South_Africa_EPI_ISL_2162318_B.1.351|Beta|_2021-05-03
South_Africa_EPI_ISL_2162359_B.1.351|Beta|_2021-04-24
South_Korea_EPI_ISL_591070_A|19B|_2020-05-20
South_Korea_EPI_ISL_426187_A|19B|_2020-02-12
South_Korea_EPI_ISL_497970_B.41|19A|_2020-02-21
South_Korea_EPI_ISL_760146_B.1.221|20A|_2020-10-24
South_Korea_EPI_ISL_760156_B.1.258|20A|_2020-09-20
South_Korea_EPI_ISL_1063589_B.1.160|20A|_2020-09-15
South_Korea_EPI_ISL_2161069_A.24|19B|_2020-09-25
South_Sudan_EPI_ISL_2450791_B.1|Eta|_2021-04-03
South_Sudan_EPI_ISL_2450788_B.1.525|Eta|_2021-03-15
South_Sudan_EPI_ISL_2450795_B.1|Eta|_2021-03-09
South_Sudan_EPI_ISL_2450805_B.1.525|Eta|_2021-02-06
South_Sudan_EPI_ISL_2450807_B.1.525|Eta|_2021-03-10
Spain_EPI_ISL_452564_B.1|20A|_2020-03-25
Spain_EPI_ISL_2271301_B.1.177|20E.EU1|_2020-11-03
Spain_EPI_ISL_2271313_B.1.177|20E.EU1|_2020-12-07
Spain_EPI_ISL_2099971_B.1.177|20E.EU1|_2020-09-25
Spain_EPI_ISL_500366_B.1|20A|_2020-05-04
Spain_EPI_ISL_1510069_B.1.1.420|20B|_2021-02-17
Spain_EPI_ISL_537307_B.1.182|20A|_2020-04-05
Spain_EPI_ISL_2323105_B.1.177|20E.EU1|_2020-10-09
Spain_EPI_ISL_418247_B.1|20A|_2020-02-26
Spain_EPI_ISL_1000990_A.28|19B|_2021-01-22
Spain_EPI_ISL_1939363_B.1.177.53|20E.EU1|_2020-08-26
Spain_EPI_ISL_1208712_B.1|20A|_2021-02-10
Spain_EPI_ISL_2140625_P.1|Gamma|_2021-05-06
Spain_EPI_ISL_824463_B.1.600|20A|_2020-08-11
Spain_EPI_ISL_2080878_B.1.621|20A|_2021-04-30
Spain_EPI_ISL_671812_B.1.177|20A|_2020-08-30
Spain_EPI_ISL_683637_B.1.177|20E.EU1|_2020-11-12
Spain_EPI_ISL_871928_B.1.177|20E.EU1|_2020-12-18
Spain_EPI_ISL_660308_B.1.177|20E.EU1|_2020-08-10
Spain_EPI_ISL_1647189_Z.1|20E.EU1|_2021-02-02
Spain_EPI_ISL_2020181_B.1.351|Beta|_2021-03-31
Spain_EPI_ISL_2179715_B.1.351|Beta|_2021-03-06
Spain_EPI_ISL_530086_B.1|20A|_2020-05-02
Spain_EPI_ISL_654320_B.1|20A|_2020-10-20
Spain_EPI_ISL_654344_B.1.177|20E.EU1|_2020-10-27
Spain_EPI_ISL_831197_B.1.177|20E.EU1|_2020-10-03
Spain_EPI_ISL_1272593_B.1.177|20E.EU1|_2021-02-10
Spain_EPI_ISL_691700_B.1.177|20E.EU1|_2020-08-19
Spain_EPI_ISL_1588756_B.1.160|20A|_2021-02-03
Spain_EPI_ISL_1588943_B.1.221|20A|_2021-02-05
Spain_EPI_ISL_1786632_B.1.1.519|20B|_2021-03-06
Spain_EPI_ISL_1093137_B.1.177|20E.EU1|_2021-01-11
Spain_EPI_ISL_1369311_B.1.221|20A|_2021-02-25
Sri_Lanka_EPI_ISL_668452_B.1.411|20A|_2020-11-09
Sri_Lanka_EPI_ISL_525474_B.4|19A|_2020-04-19
Sri_Lanka_EPI_ISL_525488_B.1|20C|_2020-07-21
Sri_Lanka_EPI_ISL_1717072_B.1.411|20A|_2021-01-18
Sri_Lanka_EPI_ISL_1717092_B.1.411|20C|_2020-12-30
Sri_Lanka_EPI_ISL_1970416_B.1.351|Beta|_2021-03-26
Suriname_EPI_ISL_517616_B.1.219|20A|_2020-05-07
Suriname_EPI_ISL_517662_B.1.219|20A|_2020-08-07
Suriname_EPI_ISL_1522177_P.2|20B|_2021-02-26
Suriname_EPI_ISL_1522075_A.2.5|19B|_2021-03-19
Suriname_EPI_ISL_1522076_A.2.5|19B|_2021-03-20
Suriname_EPI_ISL_1520447_A.2.5|19B|_2021-03-25
Suriname_EPI_ISL_1522224_P.2|20B|_2021-02-04
Sweden_EPI_ISL_1313192_B.1.177.82|20E.EU1|_2021-02-19
Sweden_EPI_ISL_2212354_B.1.351|Beta|_2021-02-23
Sweden_EPI_ISL_476139_B|19A|_2020-01-31
Sweden_EPI_ISL_475547_B.4|19A|_2020-02-28
Sweden_EPI_ISL_454442_B.1.510|20C|_2020-03-09
Sweden_EPI_ISL_510814_B.1|20C|_2020-05-28
Sweden_EPI_ISL_534227_B.1.1.261|20B|_2020-07-14
Sweden_EPI_ISL_648183_B.1.342|20C|_2020-08-04
Sweden_EPI_ISL_789004_B.1.258.22|20A|_2020-12-29
Sweden_EPI_ISL_623076_B.1.1|20B|_2020-06-03
Sweden_EPI_ISL_660383_B.1|20C|_2020-04-01
Sweden_EPI_ISL_648186_B.1.441|20A|_2020-10-06
Sweden_EPI_ISL_2418301_B.1.351|Beta|_2021-05-14
Sweden_EPI_ISL_455901_B.1|20A|_2020-03-10
Sweden_EPI_ISL_510856_B.1.1.261|20B|_2020-06-01
Sweden_EPI_ISL_1659710_B.1|20C|_2020-06-16
Sweden_EPI_ISL_510874_B.1.614|20C|_2020-06-15
Sweden_EPI_ISL_654951_B.1.1.302|20B|_2020-08-17
Sweden_EPI_ISL_1659718_B.1.177.38|20E.EU1|_2020-09-18
Sweden_EPI_ISL_831960_B.1.1.277|20B|_2020-08-17
Sweden_EPI_ISL_934334_B.1.1|20B|_2020-08-28
Sweden_EPI_ISL_913352_B.1.406|20A|_2020-10-30
Sweden_EPI_ISL_1168053_B.1.177.21|20E.EU1|_2021-02-10
Sweden_EPI_ISL_1832192_B.1.351|Beta|_2021-02-12
Sweden_EPI_ISL_1363829_B.1.351|Beta|_2021-02-18
Sweden_EPI_ISL_1618224_B.1.474|20A|_2020-12-25
Sweden_EPI_ISL_1619543_B.1.258|20A|_2020-12-11
Sweden_EPI_ISL_1198861_B.1|20D|_2021-01-27
Switzerland_EPI_ISL_535589_B.1.1.433|20B|_2020-08-17
Switzerland_EPI_ISL_729186_B.1.160.12|20A|_2020-12-09
Switzerland_EPI_ISL_1129723_B.1.221|20A|_2021-02-06
Switzerland_EPI_ISL_451857_B.1.356|20C|_2020-04-07
Switzerland_EPI_ISL_512033_B.1.1.70|20B|_2020-07-25
Switzerland_EPI_ISL_581926_B.1|20C|_2020-05-05
Switzerland_EPI_ISL_581897_B.1|20A|_2020-07-06
Switzerland_EPI_ISL_467012_B.1.1|20B|_2020-05-08
Switzerland_EPI_ISL_528332_B.1|20A|_2020-03-22
Switzerland_EPI_ISL_1748725_B.1.258.17|20A|_2021-03-28
Switzerland_EPI_ISL_2403790_B.1.1.420|20B|_2021-05-20
Switzerland_EPI_ISL_1059649_L.3|20B|_2021-02-09
Switzerland_EPI_ISL_1260227_B.1.160|20A|_2020-12-02
Switzerland_EPI_ISL_831006_B.1.160.16|20A|_2020-10-13
Switzerland_EPI_ISL_2226754_B.1.525|Eta|_2021-04-30
Switzerland_EPI_ISL_2375325_B.1.1.318|20B|_2021-05-19
Switzerland_EPI_ISL_466997_B.1|20A|_2020-05-05
Switzerland_EPI_ISL_498619_B.1.1.70|20B|_2020-07-03
Switzerland_EPI_ISL_728825_B.1.160|20A|_2020-11-06
Switzerland_EPI_ISL_486479_B.1.1|20B|_2020-04-01
Switzerland_EPI_ISL_489983_C.35|20D|_2020-06-29
Switzerland_EPI_ISL_1496289_AN.1|20B|_2020-10-21
Switzerland_EPI_ISL_1003898_B.1.160|20A|_2021-01-30
Switzerland_EPI_ISL_1131114_B.1.177.43|20E.EU1|_2021-02-03
Switzerland_EPI_ISL_1130814_B.1.160.12|20A|_2021-02-05
Switzerland_EPI_ISL_1119424_B.1.1|20B|_2021-02-12
Switzerland_EPI_ISL_1361396_A|19B|_2021-03-09
Switzerland_EPI_ISL_413021_B.1.1|20B|_2020-02-29
Taiwan_EPI_ISL_406031_B|19A|_2020-01-23
Taiwan_EPI_ISL_415742_B.4|19A|_2020-02-27
Taiwan_EPI_ISL_660543_B.1.1|20B|_2020-07-31
Taiwan_EPI_ISL_956317_B.1.1.222|20B|_2020-10-27
Taiwan_EPI_ISL_2249653_B.1.351.3|Beta|_2021-03-30
Taiwan_EPI_ISL_2250152_B.1.438.1|20A|_2021-04-13
Taiwan_EPI_ISL_493203_A.3|19B|_2020-03-23
Taiwan_EPI_ISL_738065_B.1.1.398|20B|_2020-11-26
Taiwan_EPI_ISL_1667469_B.1.177.81|20E.EU1|_2021-02-10
Taiwan_EPI_ISL_1667471_B.1.177.81|20E.EU1|_2021-02-10
Taiwan_EPI_ISL_1667472_B.1.1.28|20B|_2021-03-12
Taiwan_EPI_ISL_447252_B.4|19A|_2020-02-25
Thailand_EPI_ISL_447029_A.6|19B|_2020-04-07
Thailand_EPI_ISL_1138828_B.1.160|20A|_2020-11-09
Thailand_EPI_ISL_1138829_B.1.160|20A|_2020-11-03
Thailand_EPI_ISL_1491538_B.1.36.16|20A|_2021-03-11
Thailand_EPI_ISL_1278371_B.1.351|Beta|_2021-02-05
Thailand_EPI_ISL_437613_A.6|19B|_2020-02-25
Togo_EPI_ISL_1435763_B.1.1|20B|_2020-07-10
Togo_EPI_ISL_2279498_A|19B|_2020-09-21
Togo_EPI_ISL_1321604_A|19B|_2020-03-31
Togo_EPI_ISL_2278010_C.11|20D|_2021-03-20
Togo_EPI_ISL_1810924_A.27|19B|_2021-02-03
Togo_EPI_ISL_1508894_A.27|19B|_2021-02-04
Togo_EPI_ISL_1508916_A.27|19B|_2021-02-04
Togo_EPI_ISL_1508959_A.27|19B|_2021-02-05
Togo_EPI_ISL_1508990_A.27|19B|_2021-02-08
Togo_EPI_ISL_1509102_A.27|19B|_2021-02-11
Togo_EPI_ISL_1524717_A.27|19B|_2021-02-15
Togo_EPI_ISL_1508949_A.27|19B|_2021-02-17
Trinidad_and_Tobago_EPI_ISL_1490228_B.1.111|20A|_2020-08-22
Trinidad_and_Tobago_EPI_ISL_1591351_R.1|20B|_2021-02-18
Trinidad_and_Tobago_EPI_ISL_1591459_R.1|20B|_2021-04-06
Tunisia_EPI_ISL_2154331_B.1.351.2|Beta|_2021-04-26
Tunisia_EPI_ISL_2153433_B.1.351|Beta|_2021-04-24
Tunisia_EPI_ISL_2035940_B.1.160|20A|_2021-02-01
Tunisia_EPI_ISL_2035941_A.27|19B|_2021-02-07
Tunisia_EPI_ISL_2035942_A.27|19B|_2021-02-07
Tunisia_EPI_ISL_2035943_B.1.160|20A|_2021-02-10
Tunisia_EPI_ISL_2035944_B.1.177|20E.EU1|_2021-02-10
Tunisia_EPI_ISL_2035946_A.27|19B|_2021-03-03
Tunisia_EPI_ISL_2035947_B.1.525|Eta|_2021-03-05
Tunisia_EPI_ISL_2035948_B.1.177|20E.EU1|_2021-03-04
Tunisia_EPI_ISL_2035988_B.1.160|20A|_2021-03-08
Turkey_EPI_ISL_984982_B.1|20A|_2020-11-18
Turkey_EPI_ISL_984986_B.1.1|20B|_2020-11-20
Turkey_EPI_ISL_984992_B.1.1|20B|_2020-11-21
Turkey_EPI_ISL_984741_B.1.36|20A|_2020-11-21
Turkey_EPI_ISL_2290161_B.1.36|20A|_2021-02-03
Turkey_EPI_ISL_1061413_P.1|Gamma|_2021-02-03
Turkey_EPI_ISL_1662620_B.1.351|Beta|_2021-04-05
Turkey_EPI_ISL_1663061_B.1.351|Beta|_2021-04-07
Turkey_EPI_ISL_1663579_B.1.351|Beta|_2021-04-08
Turkey_EPI_ISL_707938_B.1.1|20B|_2020-07-26
Turkey_EPI_ISL_707939_B.1.9.4|20A|_2020-07-28
Turkey_EPI_ISL_708185_B.1.1|20B|_2020-07-29
Turkey_EPI_ISL_707936_B.1.1|20B|_2020-08-05
Turkey_EPI_ISL_1790203_B.1.177|20E.EU1|_2021-03-09
Turkey_EPI_ISL_1922075_B.1.469|20A|_2021-03-12
Turkey_EPI_ISL_1922111_B.1.351|20B|_2021-03-12
Turkey_EPI_ISL_1922119_B.1.351|Beta|_2021-03-12
Turkey_EPI_ISL_983437_B.1.1.189|20B|_2021-01-21
Turkey_EPI_ISL_812875_B.1.1|20B|_2020-12-29
Turkey_EPI_ISL_1170002_B.1|20A|_2021-02-12
Turkey_EPI_ISL_1171949_B.1|20A|_2021-02-17
Turkey_EPI_ISL_1171951_B.1.36.1|20A|_2021-02-17
Turkey_EPI_ISL_1183665_B.1.1.189|20B|_2021-02-18
Turkey_EPI_ISL_1183640_B.1.1|20B|_2021-02-19
Turkey_EPI_ISL_1196131_B.1.1|20B|_2021-02-22
Turkey_EPI_ISL_1214040_B.1.36|20A|_2021-02-23
Turkey_EPI_ISL_1229471_B.1.177|20E.EU1|_2021-02-25
Turkey_EPI_ISL_1272122_B.1.1|20B|_2021-02-26
Turkey_EPI_ISL_1278200_B.1.525|Eta|_2021-02-26
Turkey_EPI_ISL_1278219_B.1.1.521|20B|_2021-02-26
Turkey_EPI_ISL_1278262_B.1.235|20A|_2021-02-26
Turkey_EPI_ISL_1403703_B.1.524|Beta|_2021-03-03
Turkey_EPI_ISL_1583184_B.1.1|20B|_2021-03-05
Turkey_EPI_ISL_1620490_B.1.1|20B|_2021-03-04
Turkey_EPI_ISL_1534493_B.1.177|20E.EU1|_2021-03-29
Turkey_EPI_ISL_812892_B.1.1.174|20B|_2020-12-21
Turkey_EPI_ISL_2363598_B.1.1.282|20B|_2021-04-26
Turkey_EPI_ISL_2363586_B.1|20A|_2021-04-26
Turkey_EPI_ISL_2363592_B.1.1.198|20B|_2021-04-26
Turkey_EPI_ISL_2363766_B.1.351|Beta|_2021-05-05
Turkey_EPI_ISL_2158060_B.1.177|20E.EU1|_2021-04-28
Turkey_EPI_ISL_2363633_B.1.1|20B|_2021-04-26
Turkey_EPI_ISL_2363607_B.1.408|20A|_2021-04-26
Turkey_EPI_ISL_2363744_B.1.1|20B|_2021-05-05
Turkey_EPI_ISL_2158051_B.1.1|20B|_2021-04-28
Turkey_EPI_ISL_2158019_B.1|20A|_2021-04-28
Turkey_EPI_ISL_2403319_B.1|20B|_2021-05-04
Turkey_EPI_ISL_2403343_B.1.1.232|20B|_2021-05-04
Turkey_EPI_ISL_2363688_B.1.1|20B|_2021-05-05
Turkey_EPI_ISL_2232684_B.1|20A|_2021-05-07
Turkey_EPI_ISL_2363768_B.1.1|20B|_2021-05-05
Turkey_EPI_ISL_2232693_B.1.438|20A|_2021-05-07
Turkey_EPI_ISL_2403347_B.1.351|Beta|_2021-05-24
Turkey_EPI_ISL_2403370_B.1.617.2|Delta|_2021-05-24
Turkey_EPI_ISL_1678499_B.1.351|Beta|_2021-03-29
Turkey_EPI_ISL_1097291_B.1|20A|_2021-02-11
Turkey_EPI_ISL_1073657_B.1|20A|_2021-02-08
Turkey_EPI_ISL_2232648_B.1.351|20C|_2021-05-07
Turkey_EPI_ISL_2232694_B.1|20A|_2021-05-07
Turkey_EPI_ISL_812902_B.1.1|20B|_2020-12-21
Turkey_EPI_ISL_2232675_C.36|20D|_2021-05-07
Turkey_EPI_ISL_2365881_B.1.1|20B|_2021-02-28
Turkey_EPI_ISL_480236_B.1.1|20B|_2020-04-22
Turkey_EPI_ISL_735268_B.1.1|20B|_2020-04-30
Turkey_EPI_ISL_735348_B.1.1|20B|_2020-06-19
Turkey_EPI_ISL_735352_B.1.9.5|20A|_2020-06-23
Turkey_EPI_ISL_2004075_B.1.1|20B|_2021-05-03
Turkey_EPI_ISL_495436_B.1.1.181|20B|_2020-06-03
Uganda_EPI_ISL_737939_A.25|19B|_2020-07-15
Uganda_EPI_ISL_737970_A|19B|_2020-05-11
Uganda_EPI_ISL_737931_A.25|19B|_2020-07-24
Uganda_EPI_ISL_954252_A.23|19B|_2020-09-01
Uganda_EPI_ISL_954234_A.23|19B|_2020-08-15
Uganda_EPI_ISL_954279_A.23.1|19B|_2020-12-28
Uganda_EPI_ISL_1469414_A.23|19B|_2020-10-29
Uganda_EPI_ISL_2346385_B.1.1.318|20B|_2021-02-23
Uganda_EPI_ISL_2346386_B.1.351|20B|_2021-02-23
Uganda_EPI_ISL_2346387_B.1.1.318|20B|_2021-02-23
Uganda_EPI_ISL_2346389_A.25|19B|_2020-09-12
Uganda_EPI_ISL_2348639_B.1.351|Beta|_2021-03-09
Uganda_EPI_ISL_2348641_B.1.351|Beta|_2021-02-13
Uganda_EPI_ISL_2348646_B.1.351|Beta|_2021-02-16
Uganda_EPI_ISL_2346410_B.1|Eta|_2021-02-15
Uganda_EPI_ISL_2346411_B.1.1|Eta|_2021-02-15
Uganda_EPI_ISL_2346416_B.1.525|Eta|_2021-03-28
Uganda_EPI_ISL_2346417_B.1.525|Eta|_2021-03-28
Uganda_EPI_ISL_2346430_B.1.351|Beta|_2021-04-02
Uganda_EPI_ISL_2346431_B.1.351|Beta|_2021-04-01
Uganda_EPI_ISL_2346432_B.1.351|Beta|_2021-04-02
Uganda_EPI_ISL_1970567_B.1.617.1|Delta|_2021-04-20
Uganda_EPI_ISL_1970568_B.1.617.2|Delta|_2021-04-21
Ukraine_EPI_ISL_512617_B.1.1|20B|_2020-07-10
Ukraine_EPI_ISL_512639_B.1.1|20B|_2020-04-24
Ukraine_EPI_ISL_512644_B.1|20A|_2020-05-16
Ukraine_EPI_ISL_1112753_B.1.1.351|20B|_2020-12-28
Ukraine_EPI_ISL_1112310_B.1.1.351|20B|_2021-01-11
Ukraine_EPI_ISL_1112311_B.1.131|20A|_2021-01-12
Ukraine_EPI_ISL_1112328_B.1.1.39|20B|_2021-01-05
Ukraine_EPI_ISL_1112330_B.1.527|20A|_2021-01-05
United_Arab_Emirates_EPI_ISL_859623_B.1.1|20B|_2020-07-05
United_Arab_Emirates_EPI_ISL_859646_A|19B|_2020-07-05
United_Arab_Emirates_EPI_ISL_860055_B.1.466.1|20A|_2020-12-27
United_Arab_Emirates_EPI_ISL_520680_B.4.7|19A|_2020-04-08
United_Arab_Emirates_EPI_ISL_582675_A|19B|_2020-09-17
United_Arab_Emirates_EPI_ISL_582125_A|19B|_2020-01-28
Uruguay_EPI_ISL_429257_B.31|19A|_2020-03-19
Uruguay_EPI_ISL_480346_B.1.1.33|20B|_2020-05-25
Uruguay_EPI_ISL_2427515_P.1|Gamma|_2021-03-21
Uruguay_EPI_ISL_2427547_P.1|Gamma|_2021-03-21
Uruguay_EPI_ISL_2427556_P.1|Gamma|_2021-03-06
Uruguay_EPI_ISL_2427581_P.1|Gamma|_2021-04-06
Uruguay_EPI_ISL_2427611_P.1|Gamma|_2021-02-27
Uruguay_EPI_ISL_2427704_P.1|Gamma|_2021-04-05
Uruguay_EPI_ISL_2427746_P.1|Gamma|_2021-04-10
Uruguay_EPI_ISL_2427747_P.1|Gamma|_2021-04-06
Uruguay_EPI_ISL_2427754_P.1|Gamma|_2021-04-10
USA_EPI_ISL_1296933_R.1|20B|_2020-10-24
USA_EPI_ISL_2181554_P.1|Gamma|_2021-05-11
USA_EPI_ISL_2443134_B.1.617.2|Delta|_2021-06-01
USA_EPI_ISL_1324175_B.1.1.135|20B|_2020-09-08
USA_EPI_ISL_2306521_B.1.617.2|Delta|_2021-05-13
USA_EPI_ISL_1009305_B.1.1.513|20B|_2020-04-03
USA_EPI_ISL_2181560_P.1|Gamma|_2021-05-11
USA_EPI_ISL_2270203_P.1|Gamma|_2021-05-06
USA_EPI_ISL_785147_B.1.36.31|20A|_2020-11-27
USA_EPI_ISL_2216015_B.1.1|20B|_2020-08-14
USA_EPI_ISL_2224089_B.1.1.7|20B|_2020-07-22
USA_EPI_ISL_781161_B.1.1.210|20B|_2020-07-03
USA_EPI_ISL_1483173_B.1|20B|_2020-05-12
USA_EPI_ISL_2442343_B.1.617.2|Delta|_2021-06-01
Venezuela_EPI_ISL_1577798_B.1.1|20B|_2020-05-23
Venezuela_EPI_ISL_1577817_A.2|19B|_2020-03-16
Venezuela_EPI_ISL_1576833_B.1.111|20A|_2020-05-25
Venezuela_EPI_ISL_1577815_B.1.1|20B|_2020-03-18
Venezuela_EPI_ISL_476702_B.1.1|20B|_2020-04-02
Vietnam_EPI_ISL_416429_A|19B|_2020-02-11
Vietnam_EPI_ISL_1366742_A.23.1|19B|_2021-02-07
Vietnam_EPI_ISL_1366743_A.23.1|19B|_2021-02-09
Vietnam_EPI_ISL_1366745_A.23.1|19B|_2021-02-10
Vietnam_EPI_ISL_2372266_B.1.617.2|Delta|_2021-05-21
Vietnam_EPI_ISL_2372267_B.1.617.2|Delta|_2021-05-19
Vietnam_EPI_ISL_2434158_B.1.617.2|Delta|_2021-05-04
Ukraine_EPI_ISL_472580_B.1.44|20C|_2020-05-07
UK_EPI_ISL_472696_B.1.1|20B|_2020-05-09
UK_EPI_ISL_474262_B.1|20A|_2020-04-02
UK_EPI_ISL_726218_B.1.177.15|20E.EU1|_2020-11-21
China_EPI_ISL_402125_B|19A|_2019-12-26
China_EPI_ISL_406798_B|19A|_2019-12-26
China_EPI_ISL_1595852_B.1.36.16|20A|_2021-03-31
Zambia_EPI_ISL_977402_B.1.1|20B|_2020-07-03
Zambia_EPI_ISL_977421_AE.5|20B|_2020-10-27
Zambia_EPI_ISL_977260_B.1.1.448|20B|_2020-07-28
Zambia_EPI_ISL_977255_AE.5|20B|_2020-08-07
Zambia_EPI_ISL_977256_AE.1|20B|_2020-08-05
Zambia_EPI_ISL_977340_B.1.351|Beta|_2020-12-18
[truncated: 4,141 more rows]
